# Supplementary material for: Carbon negative biochar systems contribute to sustainable urban green infrastructure: a critical review
Source: Royal Society of Chemistry journal article supplement (doi:10.1039/d4gc03071k), 2024-01-01
Supplement: d4gc03071k1.zip [file 20240311_Green_Chem_Biochar_in_green_infrastructure_SI.xlsx]

## Sheet: 2023-08-18_Full record_1897
Publication Type	Authors	Book Authors	Book Editors	Book Group Authors	Author Full Names	Book Author Full Names	Group Authors	Article Title	Source Title	Book Series Title	Book Series Subtitle	Language	Document Type	Conference Title	Conference Date	Conference Location	Conference Sponsor	Conference Host	Author Keywords	Keywords Plus	Abstract	Addresses	Affiliations	Reprint Addresses	Email Addresses	Researcher Ids	ORCIDs	Funding Orgs	Funding Name Preferred	Funding Text	Cited References	Cited Reference Count	Times Cited, WoS Core	Times Cited, All Databases	180 Day Usage Count	Since 2013 Usage Count	Publisher	Publisher City	Publisher Address	ISSN	eISSN	ISBN	Journal Abbreviation	Journal ISO Abbreviation	Publication Date	Publication Year	Volume	Issue	Part Number
J	Boano, F; Costamagna, E; Caruso, A; Fiore, S; Chiappero, M; Galvao, A; Pisoeiro, J; Rizzo, A; Masi, F				Boano, Fulvio; Costamagna, Elisa; Caruso, Alice; Fiore, Silvia; Chiappero, Marco; Galvao, Ana; Pisoeiro, Joana; Rizzo, Anacleto; Masi, Fabio			Evaluation of the influence of filter medium composition on treatment performances in an open-air green wall fed with greywater	JOURNAL OF ENVIRONMENTAL MANAGEMENT			English	Article						Green wall; Greywater; Reuse; Nature-based solution; Treatment; Filter media	WASTE-WATER; GRAYWATER; FACADES	According to the European Research and Innovation Policy Agenda, nature-based solutions (NBSs) are key technologies to improve the sustainability of urban areas. Among NBSs, green walls have been recently studied for several applications, among the others the treatment of lowly polluted wastewater flows as greywater (GW, e. g. domestic wastewater excluding toilet flushes). This work is aimed at t…	[Boano, Fulvio; Costamagna, Elisa; Caruso, Alice; Fiore, Silvia; Chiappero, Marco] Politecn Torino, DIATI Dept Environm Land & Infrastruct Engn, Corso Duca Abruzzi 24, I-10129 Turin, Italy; [Boano, Fulvio; Fiore, Silvia] Politecn Torino, CleanWaterCtr PoliTo, Corso Duca Abruzzi 24, I-10129 Turin, Italy; [Galvao, Ana; Pisoeiro, Joana] Univ Lisbon, Inst Super Tecn, CERIS, Av Rovisco Pais, P-1049001…	Polytechnic University of Turin; Polytechnic University of Turin; Universidade de Lisboa; Instituto Superior Tecnico	Boano, F (corresponding author), Politecn Torino, DIATI Dept Environm Land & Infrastruct Engn, Corso Duca Abruzzi 24, I-10129 Turin, Italy.	fulvio.boano@polito.it	Costamagna, Elisa/HJA-6956-2022; Galvão, Ana/M-6997-2013; Boano, Fulvio/AAC-6739-2019; Masi, Fabio/H-3643-2019; Pisoeiro, Joana/N-9098-2016	Costamagna, Elisa/0000-0002-0264-2707; Galvão, Ana/0000-0003-1513-4522; Boano, Fulvio/0000-0003-4785-3126; Masi, Fabio/0000-0002-2305-9035; Pisoeiro, Joana/0000-0001-8042-752X; CHIAPPERO, MARCO/0000-0002-1149-2640	Compagnia di San Paolo	Compagnia di San Paolo(Compagnia di San Paolo)	The authors declare no competing financial interest. The authors acknowledge funding support provided by Compagnia di San Paolo through the project SuperGreen -SUstainable Purification of wastewatER with GREEN walls. The authors gratefully acknowledge AgriNewTech (www.agrinewtech.com/en/) for providing the compost and the biochar.		41	8	8	3	45	ACADEMIC PRESS LTD- ELSEVIER SCIENCE LTD	LONDON	24-28 OVAL RD, LONDON NW1 7DX, ENGLAND	0301-4797	1095-8630		J ENVIRON MANAGE	J. Environ. Manage.	DEC 15	2021	300
J	Costamagna, E; Caruso, A; Galvao, A; Rizzo, A; Masi, F; Fiore, S; Boano, F				Costamagna, Elisa; Caruso, Alice; Galvao, Ana; Rizzo, Anacleto; Masi, Fabio; Fiore, Silvia; Boano, Fulvio			Impact of Biochar and Graphene as Additives on the Treatment Performances of a Green Wall Fed with Greywater	WATER			English	Article						green wall; greywater; biochar; graphene; nature-based solutions; wastewater treatment	WASTE-WATER; REUSE; FACADES	The treatment of greywater (GW, wastewater share excluding toilet flush) through green walls can be beneficial for urban areas, favouring the diffusion of urban vegetation and reducing potable water consumption. Multiple challenges hinder the treatment performance of green walls, including the composition of the filtering material, the number of levels-i.e., rows-and the age of the system. This s…	[Costamagna, Elisa; Caruso, Alice; Fiore, Silvia; Boano, Fulvio] Politecn Torino, DIATI, Dept Environm Land & Infrastruct Engn, Corso Duca Abruzzi 24, I-10129 Turin, Italy; [Galvao, Ana] Univ Lisbon, CERIS, Inst Super Tecn, Ave Rovisco Pais, P-1049001 Lisbon, Portugal; [Rizzo, Anacleto; Masi, Fabio] IRIDRA Srl, Via Marmora 51, I-50121 Florence, Italy; [Fiore, Silvia; Boano, Fulvio] Politecn Torin…	Polytechnic University of Turin; Universidade de Lisboa; Instituto Superior Tecnico; Polytechnic University of Turin	Costamagna, E (corresponding author), Politecn Torino, DIATI, Dept Environm Land & Infrastruct Engn, Corso Duca Abruzzi 24, I-10129 Turin, Italy.	elisa.costamagna@polito.it	Costamagna, Elisa/HJA-6956-2022; Boano, Fulvio/AAC-6739-2019; Galvão, Ana/M-6997-2013; Rizzo, Anacleto/A-1879-2011	Costamagna, Elisa/0000-0002-0264-2707; Boano, Fulvio/0000-0003-4785-3126; Galvão, Ana/0000-0003-1513-4522; Rizzo, Anacleto/0000-0001-7833-8915; fiore, silvia/0000-0001-5949-0559; Masi, Fabio/0000-0002-2305-9035					38	0	0	6	8	MDPI	BASEL	ST ALBAN-ANLAGE 66, CH-4052 BASEL, SWITZERLAND		2073-4441		WATER-SUI	Water	JAN	2023	15	1
J	Sami, M; Hedstrom, A; Kvarnstrom, E; McCarthy, DT; Herrmann, I				Sami, M.; Hedstrom, A.; Kvarnstrom, E.; McCarthy, D. T.; Herrmann, I.			Greywater treatment in a green wall using different filter materials and hydraulic loading rates	JOURNAL OF ENVIRONMENTAL MANAGEMENT			English	Article						Biochar; Graywater; Nature -based solutions; Surfactants; Vertical gardens	WATER-TREATMENT; SAND FILTERS; MEDIA; BIOCHAR; SOIL	Green walls in urban environments can be both an aesthetic feature and be of practical use in greywater treatment. This study evaluates the effect of different loading rates (4.5 l/d, 9 l/d, and 18 l/d) on the efficiency of treating actual greywater from a city district in a pilot-scale green wall with five different filter materials as substrates (biochar, pumice, hemp fiber, spent coffee ground…	[Sami, M.; Hedstrom, A.; Kvarnstrom, E.; Herrmann, I.] Lulea Univ Technol, Dept Civil Environm & Nat Resources Engn, S-97187 Lulea, Sweden; [McCarthy, D. T.] Queensland Univ Technol, Sch Civil & Environm Engn, S Block,Level 7,S727, Brisbane, Qld, Australia	Lulea University of Technology; Queensland University of Technology (QUT)	Sami, M (corresponding author), Lulea Univ Technol, Dept Civil Environm & Nat Resources Engn, S-97187 Lulea, Sweden.	mashreki.sami@ltu.se							49	0	0	2	2	ACADEMIC PRESS LTD- ELSEVIER SCIENCE LTD	LONDON	24-28 OVAL RD, LONDON NW1 7DX, ENGLAND	0301-4797	1095-8630		J ENVIRON MANAGE	J. Environ. Manage.	APR 28	2023	340
J	Vercruysse, W; Smeets, J; Haeldermans, T; Joos, B; Hardy, A; Samyn, P; Yperman, J; Vanreppelen, K; Carleer, R; Adriaensens, P; Marchal, W; Vandamme, D				Vercruysse, Willem; Smeets, Jolien; Haeldermans, Tom; Joos, Bjorn; Hardy, An; Samyn, Pieter; Yperman, Jan; Vanreppelen, Kenny; Carleer, Robert; Adriaensens, Peter; Marchal, Wouter; Vandamme, Dries			Biochar from raw and spent common ivy: Impact of preprocessing and pyrolysis temperature on biochar properties	JOURNAL OF ANALYTICAL AND APPLIED PYROLYSIS			English	Article						Common ivy; Slow pyrolysis; Biochar; Extraction; Pyrolysis temperature	HEDERA-HELIX; BIOMASS PYROLYSIS; STEAM DISTILLATION; PLANT; FTIR; TECHNOLOGY; SAPONINS; BEHAVIOR; SYSTEMS; LEAVES	Hedera helix L., the common ivy, is an excellent evergreen climbing plant to be applied in vertical green walls to improve urban ecosystems. These green walls need to be trimmed regularly, yielding a biomass stream, which could be promising as a renewable feedstock for biochar production and the extraction of valuable chemicals. The potential of raw and spent (extracted) common ivy as a biochar f…	[Vercruysse, Willem; Smeets, Jolien; Haeldermans, Tom; Samyn, Pieter; Yperman, Jan; Vanreppelen, Kenny; Carleer, Robert; Adriaensens, Peter; Marchal, Wouter; Vandamme, Dries] UHasselt Hasselt Univ, Ctr Environm Sci CMK, Inst Mat Res IMO IMOMEC, Analyt & Circular Chem, Agoralaan, B-3590 Diepenbeek, Belgium; [Haeldermans, Tom; Vanreppelen, Kenny] Act & Sorb BV, Geleenlaan 31, B-3600 Genk, Belgium; …	Hasselt University; Hasselt University	Vandamme, D (corresponding author), UHasselt Hasselt Univ, Ctr Environm Sci CMK, Inst Mat Res IMO IMOMEC, Analyt & Circular Chem, Agoralaan, B-3590 Diepenbeek, Belgium.	dries.vandamme@uhasselt.be	Adriaensens, Peter/F-3877-2017; Carleer, Robert/AAF-1986-2019; Joos, Bjorn/AGO-8121-2022; Vandamme, Dries/I-7553-2015	Adriaensens, Peter/0000-0003-4183-0150; Carleer, Robert/0000-0002-9708-0347; JOOS, Bjorn/0000-0001-8697-8330; Vercruysse, Willem/0000-0002-0838-1616; Haeldermans, Tom/0000-0003-0036-5248; Samyn, Pieter/0000-0002-2180-7925; Vandamme, Dries/0000-0003-0941-2434	Research Foundation Flan-ders [1S92020N, AUHL/15/2-GOH3816N]; UHasselt BOF [R-10512]	Research Foundation Flan-ders(FWO); UHasselt BOF	This work was financially supported by Research Foundation Flan-ders (FWO SB - 1S92020N and Hercules project AUHL/15/2-GOH3816N) and UHasselt BOF (R-10512) ) . We would like to acknowledge the technicians that have supported and executed the an-alyses in this study: Gunter Reekmans for the 13C solid state NMR analysis and Martine Vanhamel for FTIR analysis. We would like to acknowledge GGGreen bv…		65	8	8	9	35	ELSEVIER	AMSTERDAM	RADARWEG 29, 1043 NX AMSTERDAM, NETHERLANDS	0165-2370	1873-250X		J ANAL APPL PYROL	J. Anal. Appl. Pyrolysis	OCT	2021	159
J	Lakho, FH; Vergote, J; Khan, HIUH; Depuydt, V; Depreeuw, T; Van Hulle, SWH; Rousseau, DPL				Lakho, Fida Hussain; Vergote, Jarne; Khan, Hafiz Ihsan-Ul-Haq; Depuydt, Veerle; Depreeuw, Teun; Van Hulle, Stijn W. H.; Rousseau, Diederik P. L.			Total value wall: Full scale demonstration of a green wall for grey water treatment and recycling	JOURNAL OF ENVIRONMENTAL MANAGEMENT			English	Article						Decentralized water treatment; Green infrastructure; Greywater treatment; Nature-based solutions; Total value wall; Water reuse	FLOW CONSTRUCTED WETLAND; GREYWATER TREATMENT; LIVING WALLS; URBAN; BIOCHAR; REMOVAL; REUSE; BUILDINGS; RETENTION; EFFLUENT	Greywater treatment and reuse for non-potable purposes in urban areas has become a widely researched topic to reduce the burden on fresh water resources. This study reports on the use of a green wall for treating grey water and reusing the effluent for toilet flushing, called Total Value Wall (TVW). Initially, the effectiveness of (mixtures of) different substrates, i.e. lava, lightweight expande…	[Lakho, Fida Hussain; Vergote, Jarne; Khan, Hafiz Ihsan-Ul-Haq; Van Hulle, Stijn W. H.; Rousseau, Diederik P. L.] Univ Ghent, Dept Green Chem & Technol, Lab Ind Water & Ecotechnol LIWET, Campus Kortrijk,Sint Martens Latemlaan 2B, B-8500 Kortrijk, Belgium; [Depuydt, Veerle] Flanders Knowledge Ctr Water Vlakwa, Leiestr 22, B-8500 Kortrijk, Belgium; [Depreeuw, Teun] Muurtuin, Vandenpeereboomstr 16, …	Ghent University	Lakho, FH (corresponding author), Univ Ghent, Dept Green Chem & Technol, Lab Ind Water & Ecotechnol LIWET, Campus Kortrijk,Sint Martens Latemlaan 2B, B-8500 Kortrijk, Belgium.	fidahussain.lakho@ugent.be	Van Hulle, Stijn W.H./I-5086-2013	Van Hulle, Stijn W.H./0000-0001-5773-7773; Rousseau, Diederik/0000-0002-9492-3601; Khan, Hafiz Ihsan Ul Haq/0000-0001-5657-3156	Vlaanderen Circulair; Higher Education Commission, Pakistan [HRDIUESTP (BATCH-VI)]	Vlaanderen Circulair; Higher Education Commission, Pakistan [HRDIUESTP (BATCH-VI)]	The authors are grateful to 'Vlaanderen Circulair' that supported and financed the project of Total Value Wall (2019-2021). The first author (F.H.L) and third author (H.I.K) also would like to acknowledge the financial support of the Higher Education Commission, Pakistan [HRDIUESTP (BATCH-VI)].		62	7	7	3	26	ACADEMIC PRESS LTD- ELSEVIER SCIENCE LTD	LONDON	24-28 OVAL RD, LONDON NW1 7DX, ENGLAND	0301-4797	1095-8630		J ENVIRON MANAGE	J. Environ. Manage.	NOV 15	2021	298
J	Novotny, M; Markovic, M; Racek, J; Sipka, M; Chorazy, T; Tosic, I; Hlavinek, P				Novotny, Michal; Markovic, Mihajlo; Racek, Jakub; Sipka, Milan; Chorazy, Tomas; Tosic, Ivana; Hlavinek, Petr			The use of biochar made from biomass and biosolids as a substrate for green infrastructure: A review	SUSTAINABLE CHEMISTRY AND PHARMACY			English	Review						Green infrastructure; Green roof; Growing medium; Biomass; Biosolids; Pyrolysis; Biochar	SEWAGE-SLUDGE; WALNUT SHELL; PYROLYSIS TEMPERATURE; BLACK CARBON; PHYSICOCHEMICAL PROPERTIES; MICROWAVE PYROLYSIS; CROP PRODUCTION; AQUEOUS PB(II); SLOW PYROLYSIS; AMENDED SOILS	Biochar made from biomass and biosolids can be used in substrates suitable for urban green infra-structure, especially green roofs, green parking lots, and green walls. The properties of biochar depend on the feedstock and pyrolysis conditions. Biochar made from different feedstocks, e.g., sludges, biomass, food waste, wood, and plant residues, has different physicochemical properties that affect…	[Novotny, Michal; Racek, Jakub; Chorazy, Tomas; Hlavinek, Petr] Brno Univ Technol, Fac Civil Engn, AdMaS Res Ctr, Purkynova 651-139, Brno 61200, Czech Republic; [Markovic, Mihajlo; Sipka, Milan] Univ Banja Luka, Fac Agr, Bulevar Vojvode Petra Bojov 1A, Banja Luka 78000, RS, Bosnia & Herceg; [Tosic, Ivana] Agr Inst Republ Srpska, Knjaza Milosa 17, Banja Luka 78000, Bosnia & Herceg	Brno University of Technology; University of Banja Luka (UNIBL)	Novotny, M (corresponding author), Brno Univ Technol, Fac Civil Engn, AdMaS Res Ctr, Purkynova 651-139, Brno 61200, Czech Republic.	Michal.Novotny7@vut.cz	Novotný, Michal/HLP-7849-2023	Novotný, Michal/0000-0002-8263-356X; Chorazy, Tomas/0000-0002-4778-0708	Ministry of Foreign Affairs of the Czech Republic-Department of Development Cooperation and Humanitarian Aid [22-PKVV-001]	Ministry of Foreign Affairs of the Czech Republic-Department of Development Cooperation and Humanitarian Aid	Funding This paper has been worked out with the financial support of the Ministry of Foreign Affairs of the Czech Republic-Department of Development Cooperation and Humanitarian Aid within the solution of project No. 22-PKVV-001 Use of biochar as materially trans- formed waste for extensive green roofs.		212	1	1	12	12	ELSEVIER	AMSTERDAM	RADARWEG 29, 1043 NX AMSTERDAM, NETHERLANDS		2352-5541		SUSTAIN CHEM PHARM	SUSTAIN. CHEM. PHARM.	MAY	2023	32
J	Jiang, CB; Li, JK; Li, HE; Li, YJ; Zhang, ZX				Jiang, Chunbo; Li, Jiake; Li, Huaien; Li, Yajiao; Zhang, Zhaoxin			Low-impact development facilities for stormwater runoff treatment: Field monitoring and assessment in Xi'an area, China	JOURNAL OF HYDROLOGY			English	Article						Low-impact development; Rainfall levels; Exceedance probability; Load reduction; Cost	NITROGEN REMOVAL; RAIN GARDEN; BIORETENTION; SCALE; BIOFILTERS; MANAGEMENT; DESIGN; URBANIZATION; RETENTION; BIOCHAR	Field studies are valuable because of the insufficient number of field performance data in low-impact development (LID)-related research. Four typical LID facilities in northwest China were built and monitored. These facilities differ in their impervious/pervious bottom, inflow underlying surface, media types, and combinations. The water volume reduction of impervious rain garden filled with nati…	[Jiang, Chunbo; Li, Jiake; Li, Huaien; Zhang, Zhaoxin] Xian Univ Technol, State Key Lab Ecohydraul Northwest Arid Reg China, Xian 710048, Peoples R China; [Li, Yajiao] Xian Univ Sci & Technol, Sch Architecture & Civil Engn, Xian 710054, Peoples R China	Xi'an University of Technology; Xi'an University of Science & Technology	Li, JK (corresponding author), Xian Univ Technol, State Key Lab Ecohydraul Northwest Arid Reg China, Xian 710048, Peoples R China.	xaut_ljk@163.com			Key Research and Development Project of Shaanxi Province [2017ZDXM-SF-073]; National Natural Science Foundation of China [51879215]; Natural Science Foundation of Shaanxi Province [2019JM-347]	Key Research and Development Project of Shaanxi Province; National Natural Science Foundation of China(National Natural Science Foundation of China (NSFC)); Natural Science Foundation of Shaanxi Province(Natural Science Foundation of Shaanxi Province)	This research was financially supported by the Key Research and Development Project of Shaanxi Province (2017ZDXM-SF-073), the National Natural Science Foundation of China (51879215) and the Natural Science Foundation of Shaanxi Province (2019JM-347).		39	17	18	6	50	ELSEVIER	AMSTERDAM	RADARWEG 29, 1043 NX AMSTERDAM, NETHERLANDS	0022-1694	1879-2707		J HYDROL	J. Hydrol.	JUN	2020	585
J	Yue, CY; Li, LY; Johnston, C				Yue, Chaoyang; Li, Loretta Y.; Johnston, Chris			Exploratory study on modification of sludge-based activated carbon for nutrient removal from stormwater runoff	JOURNAL OF ENVIRONMENTAL MANAGEMENT			English	Article						Adsorption; Nutrient removal; Sludge-based sorbent; Stormwater management	WASTE-WATER TREATMENT; SEWAGE-SLUDGE; AQUEOUS-SOLUTIONS; RECEIVING WATERS; AMENDED SOILS; PHOSPHATE; BIOCHAR; PHOSPHORUS; ADSORPTION; NITRATE	Nutrients (P, N) in stormwater runoff are a major cause of eutrophication and algal blooms. A promising solution to this problem is to amend the rain garden growing medium (RGGM) with sewage sludge-based activated carbon (SBAC). To optimize the SBAC production process, different metals, pyrolysis conditions (temperature, heating time, carrier gas), and post-treatments were explored. When pyrolyze…	[Yue, Chaoyang; Li, Loretta Y.] Univ British Columbia, Dept Civil Engn, 6250 Appl Sci Lane, Vancouver, BC V6T 1Z4, Canada; [Johnston, Chris] Kerr Wood Leidal Associates Ltd, 200-4185 Still Creek Dr, Burnaby, BC V5C 6G9, Canada	University of British Columbia	Li, LY (corresponding author), Univ British Columbia, Dept Civil Engn, 6250 Appl Sci Lane, Vancouver, BC V6T 1Z4, Canada.	lli@civil.ubc.ca			Kerr Wood Leidal Associates Ltd. through Mitacs Accelerate Program [IT08172]	Kerr Wood Leidal Associates Ltd. through Mitacs Accelerate Program	This work was sponsored by Kerr Wood Leidal Associates Ltd. through Mitacs Accelerate Program (Grant#: IT08172).		48	14	14	1	68	ACADEMIC PRESS LTD- ELSEVIER SCIENCE LTD	LONDON	24-28 OVAL RD, LONDON NW1 7DX, ENGLAND	0301-4797	1095-8630		J ENVIRON MANAGE	J. Environ. Manage.	NOV 15	2018	226
J	Fabian, PS; Lee, DH; Shin, SW; Kang, JH				Fabian, Pamela Sofia; Lee, Dong Hoon; Shin, Sang Wook; Kang, Joo-Hyon			Assessment of pyrene adsorption on biochars prepared from green infrastructure plants: Toward a closed-loop recycling in managing toxic stormwater pollutants	JOURNAL OF WATER PROCESS ENGINEERING			English	Article						Biochar; Green infrastructure; Polycyclic aromatic hydrocarbons; Stormwater runoff; Heavy metals	POLYCYCLIC AROMATIC-HYDROCARBONS; LOW-IMPACT DEVELOPMENT; PYROLYSIS TEMPERATURE; HEAVY-METAL; POTENTIAL APPLICATIONS; FEEDSTOCK TYPE; STRAW BIOCHAR; HEATING RATE; PAHS; REMOVAL	Recently biochar is receiving increased attention as an alternative filter medium for enhanced stormwater management. This study attempted to recycle plants harvested from the upper green infrastructure (GI) component for reuse in the lower GI component as a filter medium. Dawn redwood (DR) and bridal wreath (BW) were harvested and converted to biochar. Leaves and branches of each plant species w…	Dongguk Univ, Dept Civil & Environm Engn, Seoul 04620, South Korea; [Fabian, Pamela Sofia; Lee, Dong Hoon; Shin, Sang Wook; Kang, Joo-Hyon] Dongguk Univ Seoul, Dept Civil & Environm Engn, Seoul 04620, South Korea	Dongguk University; Dongguk University	Kang, JH (corresponding author), Dongguk Univ Seoul, Dept Civil & Environm Engn, Seoul 04620, South Korea.	joohyon@dongguk.edu			National Research Foundation of Korea [NRF-2018R1D1A1B07041093]	National Research Foundation of Korea(National Research Foundation of Korea)	This research was supported by the National Research Foundation of Korea (NRF-2018R1D1A1B07041093) .		82	2	2	3	7	ELSEVIER	AMSTERDAM	RADARWEG 29, 1043 NX AMSTERDAM, NETHERLANDS	2214-7144			J WATER PROCESS ENG	J. Water Process. Eng.	AUG	2022	48
J	Huang, S; Huang, DS; Garg, A; Jiang, MJ; Mei, GX; Pekkat, S				Huang, Shan; Huang, Disheng; Garg, Ankit; Jiang, Mingjie; Mei, Guoxiong; Pekkat, Sreeja			Stormwater management of biochar-amended green roofs: peak flow and hydraulic parameters using combined experimental and numerical investigation	BIOMASS CONVERSION AND BIOREFINERY			English	Article; Early Access						Green roof; Biochar; Substrate amendment; Stormwater management; Multilayer substrate	SOIL-WATER RETENTION; GAS-PERMEABILITY; INFILTRATION; RUNOFF; CLAY; CONDUCTIVITY; MACROPORES; AMENDMENT; QUANTITY; MOISTURE	Green roofs have been suggested as one solution to manage stormwater in cities. Soil amendments such as biochar appear to be very promising owing to its water retention capacity. Furthermore, biochar is more stable with time (expected half-life over 100 years) than other biomass (fibers), which is likely to degrade at higher rate upon microbial action. Rational utilization of biochar-amended soil…	[Huang, Shan; Huang, Disheng; Garg, Ankit; Jiang, Mingjie; Mei, Guoxiong] Guangxi Univ, Coll Civil Engn & Architecture, Nanning 530004, Peoples R China; [Huang, Shan; Huang, Disheng; Garg, Ankit; Jiang, Mingjie; Mei, Guoxiong] Guangxi Univ, Key Lab Disaster Prevent & Struct Safety, Minist Educ, Nanning 530004, Peoples R China; [Huang, Shan; Huang, Disheng; Garg, Ankit; Jiang, Mingjie; Mei, Guoxio…	Guangxi University; Guangxi University; Guangxi University; Indian Institute of Technology System (IIT System); Indian Institute of Technology (IIT) - Guwahati	Jiang, MJ; Mei, GX (corresponding author), Guangxi Univ, Coll Civil Engn & Architecture, Nanning 530004, Peoples R China.;Jiang, MJ; Mei, GX (corresponding author), Guangxi Univ, Key Lab Disaster Prevent & Struct Safety, Minist Educ, Nanning 530004, Peoples R China.;Jiang, MJ; Mei, GX (corresponding author), Guangxi Univ, Guangxi Key Lab Disaster Prevent & Struct Safety, Nanning 530004, Peoples R…	20180121@gxu.edu.cn; meiguox@163.com	garg, ankit/AAH-9210-2019; Pekkat, Sreeja/AAE-2512-2020	garg, ankit/0000-0001-5377-8519; Pekkat, Sreeja/0000-0001-9166-5590	National Natural Science Foundation of China [41672296, 51878185, 41867034]; Innovative Research Team Program of Guangxi Natural Science Foundation [2016GXNSFGA380008]; Bagui Scholars Program [2016A31]; China Scholarship Council (CSC) [201906660001, 201808455023]	National Natural Science Foundation of China(National Natural Science Foundation of China (NSFC)); Innovative Research Team Program of Guangxi Natural Science Foundation; Bagui Scholars Program; China Scholarship Council (CSC)(China Scholarship Council)	This work had been supported by the National Natural Science Foundation of China (grant no. 41672296, 51878185, 41867034), the Innovative Research Team Program of Guangxi Natural Science Foundation (grant no. 2016GXNSFGA380008), the Bagui Scholars Program (grant no. 2016A31), and the China Scholarship Council (CSC) (grant no. 201906660001, 201808455023).		60	3	3	4	48	SPRINGER HEIDELBERG	HEIDELBERG	TIERGARTENSTRASSE 17, D-69121 HEIDELBERG, GERMANY	2190-6815	2190-6823		BIOMASS CONVERS BIOR	Biomass Convers. Biorefinery	2020 NOV 3	2020
J	Kong, Z; Ma, HY; Song, YQ; Wang, XY; Li, LQ; Yuan, YS; Shao, ZY; Chai, HX				Kong, Zheng; Ma, Haiyuan; Song, Yunqian; Wang, Xinyue; Li, Liqing; Yuan, Yunsong; Shao, Zhiyu; Chai, Hongxiang			A long term study elucidates the relationship between media amendment and pollutant treatment in the stormwater bioretention system: Stability or efficiency?	WATER RESEARCH			English	Article						Stormwater runoff; Green infrastructure; Stormwater biofilter; Stormwater management; Low impact development; Rain garden	REMOVAL; BIOFILTERS; SCALE	Media amendment has been more and more frequently tested in stormwater bioretention systems for enhanced runoff pollutant treatment. However, few studies systematically evaluated the amended system over a long time span, which hindered the further optimization of the proposed amended media. In this study, biochar-pyrite system (PB), conventional sand system (SB), and biochar-woodchip system (WB) …	[Kong, Zheng; Ma, Haiyuan; Song, Yunqian; Wang, Xinyue; Yuan, Yunsong; Shao, Zhiyu; Chai, Hongxiang] Chongqing Univ, Coll Environm & Ecol, Key Lab Ecoenvironm Three Gorges Reservoir Reg, Minist Educ, Chongqing 400045, Peoples R China; [Li, Liqing] China Univ Geosci, Sch Environm Sci, Wuhan 430074, Peoples R China	Chongqing University; China University of Geosciences	Shao, ZY; Chai, HX (corresponding author), Chongqing Univ, Coll Environm & Ecol, Key Lab Ecoenvironm Three Gorges Reservoir Reg, Minist Educ, Chongqing 400045, Peoples R China.	shaozhiyu@cqu.edu.cn; chaihx@cqu.edu.cn	MA, Haiyuan/X-9248-2019; Shao, Zhiyu/HCI-2889-2022	MA, Haiyuan/0000-0002-4913-4128; Shao, Zhiyu/0000-0002-5565-1578; Chai, Hongxiang/0000-0001-7163-6055; Kong, Zheng/0000-0002-1008-5912; Song, Yunqian/0000-0003-0225-1690	National Natural Sci-ence Foundation of China; Creative Research Groups in Colleges and Universities of Chongqing; Water Environment Protection and Management in Mountainous; [51878094]; [CXQT21001]	National Natural Sci-ence Foundation of China(National Natural Science Foundation of China (NSFC)); Creative Research Groups in Colleges and Universities of Chongqing; Water Environment Protection and Management in Mountainous; ;	Acknowledgements We acknowledge the financial support of the National Natural Sci-ence Foundation of China (No. 51878094) and the support of Creative Research Groups in Colleges and Universities of Chongqing (No. CXQT21001, Water Environment Protection and Management in Mountainous		38	2	2	33	79	PERGAMON-ELSEVIER SCIENCE LTD	OXFORD	THE BOULEVARD, LANGFORD LANE, KIDLINGTON, OXFORD OX5 1GB, ENGLAND	0043-1354	1879-2448		WATER RES	Water Res.	OCT 15	2022	225
J	Kuoppamaki, K				Kuoppamaki, Kirsi			Vegetated roofs for managing stormwater quantity in cold climate	ECOLOGICAL ENGINEERING			English	Article						Green roof; Urban runoff; Runoff reduction; Runoff volume; Urban flood; Biochar	EXTENSIVE GREEN ROOFS; HYDROLOGICAL PERFORMANCE; RUNOFF QUANTITY; WATER RUNOFF; RETENTION	Vegetated roofs, i.e. green roofs, were continuously measured for runoff to quantify their capacity to manage stormwater in a field experiment in southern Finland, with distinct seasonality and varying weather conditions. Attention was paid to heavy storms to study the potential in mitigating urban flooding. In addition, the impact of biochar amendment (10% v/v) on rainfall retention was studied.…	[Kuoppamaki, Kirsi] Univ Helsinki, Fac Biol & Environm Sci, Ecosyst & Environm Res Programme, Niemenkatu 73, FIN-15140 Lahti, Finland	University of Helsinki	Kuoppamaki, K (corresponding author), Univ Helsinki, Fac Biol & Environm Sci, Ecosyst & Environm Res Programme, Niemenkatu 73, FIN-15140 Lahti, Finland.	kirsi.kuoppamaki@helsinki.fi	Kuoppamaki, Kirsi/E-8699-2015	Kuoppamaki, Kirsi/0000-0002-6703-4024	Kone Foundation [201608812]; Academy of Finland [263308]; HelsinkiUusimaa Region; Academy of Finland (AKA) [263308, 263308] Funding Source: Academy of Finland (AKA)	Kone Foundation; Academy of Finland(Research Council of Finland); HelsinkiUusimaa Region(Region Auvergne-Rhone-AlpesRegion Bourgogne-Franche-ComteRegion Hauts-de-FranceRegion Nouvelle-Aquitaine); Academy of Finland (AKA)(Research Council of Finland)	This study was financed by Kone Foundation (grant number 201608812) and was also part of the project The quality and quantity of runoff water in relation to land use in urbanised catchments, URCA, financed by the Academy of Finland (project number 263308). HelsinkiUusimaa Region awarded funding to construct the experimental setup. Students in the Master's Degree Programme in Multidisciplinary Stu…		44	5	5	3	23	ELSEVIER	AMSTERDAM	RADARWEG 29, 1043 NX AMSTERDAM, NETHERLANDS	0925-8574	1872-6992		ECOL ENG	Ecol. Eng.	NOV	2021	171
J	Gan, L; Garg, A; Wang, H; Mei, GX; Liu, JQ				Gan, Lin; Garg, Ankit; Wang, Hao; Mei, Guoxiong; Liu, Jiaqin			Influence of biochar amendment on stormwater management in green roofs: experiment with numerical investigation	ACTA GEOPHYSICA			English	Article						Biochar; Green roof; Hydrological process; Numerical simulation; Rainwater management	GAS-PERMEABILITY; WATER-RETENTION; SOIL; INFILTRATION; RUNOFF; MODEL; VEGETATION; MECHANISM; RAINFALL; MOISTURE	Green roof is known to minimize urban waterlogging owing to its water retention capacity due to the presence of substrate soil layer. Biochar, which is a carbon-negative material, appears to be an essential soil amendment in green roof due to its water-holding capacity and stability. Recently, incentives are provided in developed countries to enhance commercial production of biochar for usage in …	[Gan, Lin; Wang, Hao; Mei, Guoxiong; Liu, Jiaqin] Guangxi Univ, Coll Civil Engn & Architecture, Nanning, Guangxi, Peoples R China; [Gan, Lin; Wang, Hao; Mei, Guoxiong; Liu, Jiaqin] Guangxi Univ, Key Lab Disaster Prevent & Struct Safety, Minist Educ, Nanning, Guangxi, Peoples R China; [Gan, Lin; Wang, Hao; Mei, Guoxiong; Liu, Jiaqin] Key Lab Disaster Prevent & Mitigat & Engn Safety, Nanning, Guang…	Guangxi University; Guangxi University; Shantou University	Mei, GX (corresponding author), Guangxi Univ, Coll Civil Engn & Architecture, Nanning, Guangxi, Peoples R China.;Mei, GX (corresponding author), Guangxi Univ, Key Lab Disaster Prevent & Struct Safety, Minist Educ, Nanning, Guangxi, Peoples R China.;Mei, GX (corresponding author), Key Lab Disaster Prevent & Mitigat & Engn Safety, Nanning, Guangxi, Peoples R China.	1910391017@st.gxu.edu.cn; ankit@stu.edu.cn; 1810301055@st.gxu.edu.cn; meiguox@163.com; 1361656074@qq.com	garg, ankit/AAH-9210-2019	garg, ankit/0000-0001-5377-8519	National Natural Science Foundation of China [51878185]; Innovative Research Team Program of Guangxi Natural Science Foundation [2016GXNSFGA380008]	National Natural Science Foundation of China(National Natural Science Foundation of China (NSFC)); Innovative Research Team Program of Guangxi Natural Science Foundation	This study was supported by the National Natural Science Foundation of China (Grant No. 51878185) and Innovative Research Team Program of Guangxi Natural Science Foundation (Grant No. 2016GXNSFGA380008).		49	8	9	6	35	SPRINGER INT PUBL AG	CHAM	GEWERBESTRASSE 11, CHAM, CH-6330, SWITZERLAND	1895-6572	1895-7455		ACTA GEOPHYS	Acta Geophys.	DEC	2021	69	6
J	Kuoppamaki, K; Hagner, M; Lehvavirta, S; Setala, H				Kuoppamaki, Kirsi; Hagner, Marleena; Lehvavirta, Susanna; Setala, Heikki			Biochar amendment in the green roof substrate affects runoff quality and quantity	ECOLOGICAL ENGINEERING			English	Article						Living roof; Stormwater; Water quality; Nutrients; Charcoal; Water pollution; Soil amendmenta	RAINWATER RUNOFF; WATER-QUALITY; PERFORMANCE; POLLUTION; SOILS	The utilisation of ecosystem services has been suggested as one solution to manage urban environmental problems, one of which is the excessive quantity or poor quality stormwater. As roofs contribute significantly to the amount of runoff, vegetated, i.e. green roofs have become an increasingly popular way to manage urban water in densely built areas. However, green roofs may introduce a new sourc…	[Kuoppamaki, Kirsi; Hagner, Marleena; Setala, Heikki] Univ Helsinki, Dept Environm Sci, Niemenkatu 73, FIN-15140 Lahti, Finland; [Lehvavirta, Susanna] Univ Helsinki, Bot Unit, POB 7 Unioninkatu 44, FIN-15140 Lahti, Finland	University of Helsinki; University of Helsinki	Kuoppamaki, K (corresponding author), Univ Helsinki, Dept Environm Sci, Niemenkatu 73, FIN-15140 Lahti, Finland.	kirsi.kuoppamaki@helsinki.fi	Kuoppamaki, Kirsi/E-8699-2015; Setälä, Heikki M/P-7354-2015; Lehvävirta, Susanna/L-3948-2014	Kuoppamaki, Kirsi/0000-0002-6703-4024; Lehvävirta, Susanna/0000-0002-8148-9981; Setala, Heikki Martti/0000-0002-5230-4001	Helsinki University Centre for Environment, HENVI; Helsinki-Uusimaa Region; Kone Foundation; Maj and Tor Nessling Foundation	Helsinki University Centre for Environment, HENVI; Helsinki-Uusimaa Region(Region Auvergne-Rhone-AlpesRegion Bourgogne-Franche-ComteRegion Hauts-de-FranceRegion Nouvelle-Aquitaine); Kone Foundation; Maj and Tor Nessling Foundation	This study was done in the Fifth Dimension-Green Roofs in Urban Areas research group as part of the project ENSURE, Enhancing Sustainable Urban Development through Ecosystem Services, funded by Helsinki University Centre for Environment, HENVI. The study was also financially supported by the Helsinki-Uusimaa Region, Kone Foundation as well as Maj and Tor Nessling Foundation. Students in the Maste…		36	52	59	3	159	ELSEVIER	AMSTERDAM	RADARWEG 29, 1043 NX AMSTERDAM, NETHERLANDS	0925-8574	1872-6992		ECOL ENG	Ecol. Eng.	MAR	2016	88
J	Teixido, M; Charbonnet, JA; LeFevre, GH; Luthy, RG; Sedlak, DL				Teixido, Marc; Charbonnet, Joseph A.; LeFevre, Gregory H.; Luthy, Richard G.; Sedlak, David L.			Use of pilot-scale geomedia-amended biofiltration system for removal of polar trace organic and inorganic contaminants from stormwater runoff	WATER RESEARCH			English	Article						Stormwater treatment; Biofilter; Biochar; Manganese oxide; Trace organic contaminants; Trace metals; Urban runoff	ACTIVATED CARBON; BLACK CARBON; AQUIFER RECHARGE; PARTICLE-SIZE; HEAVY-METALS; BIOCHAR; SOIL; CHEMICALS; PERFORMANCE; ADSORPTION	Stormwater runoff capture and groundwater recharge can provide a sustainable means of augmenting the local water resources in water-stressed cities while simultaneously mitigating flood risk, provided that these processes do not compromise groundwater quality. We developed and tested for one year an innovative pilot-scale stormwater treatment train that employs cost-effective engineered geomedia …	[Teixido, Marc; Charbonnet, Joseph A.; LeFevre, Gregory H.; Luthy, Richard G.; Sedlak, David L.] Re Inventing Nations Urban Water Infrastruct ReNU, Natl Sci Fdn Engn Res Ctr, Berkeley, CA USA; [Teixido, Marc; Charbonnet, Joseph A.; Sedlak, David L.] Univ Calif Berkeley, Dept Civil & Environm Engn, Berkeley, CA 94720 USA; [Teixido, Marc] Inst Environm Assessment & Water Res IDAEA CSIC, Dept Geosci…	National Science Foundation (NSF); University of California System; University of California Berkeley; Consejo Superior de Investigaciones Cientificas (CSIC); CSIC - Centro de Investigacion y Desarrollo Pascual Vila (CID-CSIC); CSIC - Instituto de Diagnostico Ambiental y Estudios del Agua (IDAEA); Iowa State University; Stanford University; University of Iowa	Sedlak, DL (corresponding author), Univ Calif Berkeley, Dept Civil & Environm Engn, Berkeley, CA 94720 USA.	sedlak@ce.berkeley.edu	Teixidó, Marc/HLV-9398-2023	Teixidó, Marc/0000-0002-1225-8047; Charbonnet, Joseph/0000-0001-8766-6072; LeFevre, Gregory/0000-0002-7746-0297; Luthy, Richard/0000-0003-0274-0240	Water Research Foundation [1028968]; National Science Foundation Engineering Research Center Program [1844720]; NSF; Sonoma County Water Agency; [4567]; Directorate For Engineering; Div Of Chem, Bioeng, Env, & Transp Sys [1844720] Funding Source: National Science Foundation	Water Research Foundation; National Science Foundation Engineering Research Center Program; NSF(National Science Foundation (NSF)); Sonoma County Water Agency; ; Directorate For Engineering; Div Of Chem, Bioeng, Env, & Transp Sys(National Science Foundation (NSF)NSF - Directorate for Engineering (ENG))	This work was supported by the Water Research Foundation (Project #4567) and the National Science Foundation Engineering Research Center Program for Reinventing the Nation's Urban Water Infrastructure (ReNUWIt NSF ERC 1028968) . GHL was supported by NSF grant 1844720. We thank Donald Dillard, Bryan Murray, and Dr. Brian Halaburka for their efforts in building the field setup and assistance inthe …		68	3	3	18	35	PERGAMON-ELSEVIER SCIENCE LTD	OXFORD	THE BOULEVARD, LANGFORD LANE, KIDLINGTON, OXFORD OX5 1GB, ENGLAND	0043-1354	1879-2448		WATER RES	Water Res.	NOV 1	2022	226
J	Graham, KE; Anderson, CE; Boehm, AB				Graham, Katherine E.; Anderson, Claire E.; Boehm, Alexandria B.			Viral pathogens in urban stormwater runoff: Occurrence and removal via vegetated biochar-amended biofilters	WATER RESEARCH			English	Article						stormwater; urban runoff; adenovirus; enterovirus; norovirus GII; MS2; pathogen; biofilter; vegetation	ESCHERICHIA-COLI REMOVAL; SANTA-MONICA BAY; ENTERIC VIRUSES; FECAL POLLUTION; PCR ASSAYS; LAND-COVER; INDICATOR ORGANISMS; HUMAN ADENOVIRUSES; COASTAL WATERS; ELUTION METHOD	Urban runoff is one of the greatest sources of microbial pollution to surface waters. Biofilters can limit the impact of stormwater runoff on surface water quality by diverting runoff from receiving waters. However, our understanding of how biofilter design choices, including the addition of vegetation and geomedia, may impact the removal of pathogens is lacking. In this study, we characterized v…	[Graham, Katherine E.; Anderson, Claire E.; Boehm, Alexandria B.] Stanford Univ, Dept Civil & Environm Engn, Stanford, CA 94305 USA	Stanford University	Boehm, AB (corresponding author), Stanford Univ, Dept Civil & Environm Engn, Stanford, CA 94305 USA.	aboehm@stanford.edu		Anderson, Claire/0000-0001-9626-4964; Graham, Katherine/0000-0002-4148-1395; Boehm, Alexandria/0000-0002-8162-5090	NSF [EEC-1028968]; UPS Endowment Fund	NSF(National Science Foundation (NSF)); UPS Endowment Fund	This work received funding from NSF through grant number EEC-1028968 (NSF: US National Science Foundationhttp://www.nsf.gov/) and the UPS Endowment Fund. The sponsor played no role in the study design, data collection and analysis, decision to publish or prep of the manuscript. We thank Ben Kranner, Rachel Portillo, Duncan Mactavish, and Jessica de la Paz for their help with fieldwork and/or biof…		74	9	9	14	47	PERGAMON-ELSEVIER SCIENCE LTD	OXFORD	THE BOULEVARD, LANGFORD LANE, KIDLINGTON, OXFORD OX5 1GB, ENGLAND	0043-1354	1879-2448		WATER RES	Water Res.	DEC 1	2021	207
J	Kuoppamaki, K; Lehvavirta, S				Kuoppamaki, Kirsi; Lehvavirta, Susanna			Mitigating nutrient leaching from green roofs with biochar	LANDSCAPE AND URBAN PLANNING			English	Article						Vegetated roofs; Urban runoff; Water quality; Nitrogen; Phosphorus; Stormwater management	RUNOFF WATER QUANTITY; RAINWATER RUNOFF; SUBSTRATE DEPTH; QUALITY; PERFORMANCE; POLLUTION; DYNAMICS	Green roofs may have great potential for managing urban runoff but their effects on the quality of infiltrating water are highly variable. At worst, it can contain high concentrations of nutrient pollutants, especially phosphorus. We made a survey in southern Finland and found much higher concentrations of phosphorus and nitrogen in runoff from existing green roofs than nearby non-vegetated bitum…	[Kuoppamaki, Kirsi] Univ Helsinki, Dept Environm Sci, Niemenkatu 73, FIN-15140 Lahti, Finland; [Lehvavirta, Susanna] Univ Helsinki, Finnish Museum Nat Hist, Bot Unit, POB 7,Unioninkatu 44, FIN-15140 Lahti, Finland	University of Helsinki; University of Helsinki	Kuoppamaki, K (corresponding author), Univ Helsinki, Dept Environm Sci, Niemenkatu 73, FIN-15140 Lahti, Finland.	kirsi.kuoppamaki@helsinki.fi; susanna.lehvavirta@helsinki.fi	Lehvävirta, Susanna/L-3948-2014; Kuoppamaki, Kirsi/E-8699-2015	Lehvävirta, Susanna/0000-0002-8148-9981; Kuoppamaki, Kirsi/0000-0002-6703-4024	Academy of Finland [263308]; Helsinki University Centre for Environment, HENVI; Kone Foundation; Helsinki-Uusimaa Region; Academy of Finland (AKA) [263308, 263308] Funding Source: Academy of Finland (AKA)	Academy of Finland(Research Council of Finland); Helsinki University Centre for Environment, HENVI; Kone Foundation; Helsinki-Uusimaa Region(Region Auvergne-Rhone-AlpesRegion Bourgogne-Franche-ComteRegion Hauts-de-FranceRegion Nouvelle-Aquitaine); Academy of Finland (AKA)(Research Council of Finland)	This study was done in the Fifth Dimension Green Roofs in Urban Areas research group. It was a part of two projects: The quality and quantity of runoff water in relation to land use in urbanised catchments, URCA, financed by the Academy of Finland (project number 263308), and Enhancing Sustainable Urban Development through Ecosystem Services, ENSURE, financed by the Helsinki University Centre for…		43	42	46	4	170	ELSEVIER SCIENCE BV	AMSTERDAM	PO BOX 211, 1000 AE AMSTERDAM, NETHERLANDS	0169-2046	1872-6062		LANDSCAPE URBAN PLAN	Landsc. Urban Plan.	AUG	2016	152
J	Liu, QS; Wu, LY; Gorring, M; Deng, Y				Liu, Qingsong; Wu, Laying; Gorring, Matthew; Deng, Yang			Aluminum-Impregnated Biochar for Adsorption of Arsenic(V) in Urban Stormwater Runoff	JOURNAL OF ENVIRONMENTAL ENGINEERING			English	Article						Urban stormwater runoff; Arsenic; Aluminum-impregnated Biochar; Adsorption; Surface modification	NATURAL ORGANIC-MATTER; ESCHERICHIA-COLI; MAGNETIC BIOCHAR; SURFACE RUNOFF; SOLID-WASTES; REMOVAL; WATER; ARSENATE; IRON; COMPLEXATION	Biochar has recently emerged for the alleviation of various pollutants in urban runoff. However, the adsorption of arsenate (a frequently identified pollutant in urban runoff) with biochar is typically poor. In this study, an aluminum-impregnated biochar was investigated for adsorption of arsenate. Results with synthetic arsenic-polluted urban runoff show that As(V) was bound to amorphous aluminu…	[Liu, Qingsong] China Univ Geosci, Sch Water Resources & Environm, Beijing 100083, Peoples R China; [Liu, Qingsong; Gorring, Matthew; Deng, Yang] Montclair State Univ, Dept Earth & Environm Studies, 1 Normal Ave, Montclair, NJ 07043 USA; [Wu, Laying] Montclair State Univ, Microscopy & Microanal Res Lab, 1 Normal Ave, Montclair, NJ 07043 USA	China University of Geosciences; Montclair State University; Montclair State University	Deng, Y (corresponding author), Montclair State Univ, Dept Earth & Environm Studies, 1 Normal Ave, Montclair, NJ 07043 USA.	liukingsong@163.com; wul@montclair.edu; gorringm@montclair.edu; dengy@montclair.edu	Deng, Yang/HLG-9800-2023; Deng, Yang/G-7914-2018	Deng, Yang/0000-0002-2908-3044; Liu, Qingsong/0000-0001-6012-5129	China Scholar Council; Natural Science Foundation of China [21407130]	China Scholar Council; Natural Science Foundation of China(National Natural Science Foundation of China (NSFC))	Dr. Q. Liu worked at Montclair State University under the Visiting Scholar Fellowship Program of China Scholar Council. He is grateful for the support from Natural Science Foundation of China (No. 21407130). The authors greatly appreciate the Global Education Center of Montclair State University.		50	23	24	6	113	ASCE-AMER SOC CIVIL ENGINEERS	RESTON	1801 ALEXANDER BELL DR, RESTON, VA 20191-4400 USA	0733-9372	1943-7870		J ENVIRON ENG	J. Environ. Eng.-ASCE	APR	2019	145	4
J	Zhang, QQ; Miao, LP; Wang, HW; Wang, L				Zhang Qianqian; Miao Liping; Wang Huiwei; Wang Long			Analysis of the effect of green roof substrate amended with biochar on water quality and quantity of rainfall runoff	ENVIRONMENTAL MONITORING AND ASSESSMENT			English	Article						Green roof; Biochar; Rainfall runoff; Water quality; Water quantity	HYDROLOGICAL PERFORMANCE; MANURE	Green roofs are becoming a popular ecological alternative in urban areas worldwide. In this study, we constructed two modular green roofs (commercial substrate green roof and biochar substrate green roof) and analyzed the effects that the green roof substrate amended with biochar on the runoff retention capacity, water quality, pollutants releasing characteristic, and pollution load by simulating…	[Zhang Qianqian; Wang Huiwei; Wang Long] Chinese Acad Geol Sci, Inst Hydrogeol & Environm Geol, Hebei & China Geol Survey Key Lab Groundwater Rem, Shijiazhuang 050061, Hebei, Peoples R China; [Miao Liping] Agr Reg Planning Off Hebei Prov, Shijiazhuang 050000, Hebei, Peoples R China	China Geological Survey; Chinese Academy of Geological Sciences; Institute of Hydrogeology & Environmental Geology, Chinese Academy of Geological Sciences	Zhang, QQ (corresponding author), Chinese Acad Geol Sci, Inst Hydrogeol & Environm Geol, Hebei & China Geol Survey Key Lab Groundwater Rem, Shijiazhuang 050061, Hebei, Peoples R China.	z_qqian@163.com	Zhang, Qianqian/C-6476-2015		Open Foundation of the State Key Laboratory of Urban and Regional Ecology of China [SKLURE2019-2-3]; National Natural Science Foundation of China [41401593]; National Key R&D Program of China [2017YFF0207303]; Fundamental Research Funds of the Institute of Hydrogeology and Environmental Geology, Chinese Academy of Geological Sciences [SK201707]	Open Foundation of the State Key Laboratory of Urban and Regional Ecology of China; National Natural Science Foundation of China(National Natural Science Foundation of China (NSFC)); National Key R&D Program of China; Fundamental Research Funds of the Institute of Hydrogeology and Environmental Geology, Chinese Academy of Geological Sciences	The study was supported by Open Foundation of the State Key Laboratory of Urban and Regional Ecology of China (No. SKLURE2019-2-3) and National Natural Science Foundation of China (No. 41401593), National Key R&D Program of China (2017YFF0207303), and the Fundamental Research Funds of the Institute of Hydrogeology and Environmental Geology, Chinese Academy of Geological Sciences (No. SK201707).		35	21	23	7	69	SPRINGER	DORDRECHT	VAN GODEWIJCKSTRAAT 30, 3311 GZ DORDRECHT, NETHERLANDS	0167-6369	1573-2959		ENVIRON MONIT ASSESS	Environ. Monit. Assess.	MAY	2019	191	5
J	Meng, RF; Zhang, QQ; Li, DS; Wang, HW				Meng, Ruifang; Zhang, Qianqian; Li, Dongsheng; Wang, Huiwei			Influence of Substrate Layer Thickness and Biochar on the Green Roof Capacity to Intercept Rainfall and Reduce Pollution in Runoff	POLISH JOURNAL OF ENVIRONMENTAL STUDIES			English	Article						green roof; substrate components; nonpoint source pollution; runoff retention; pollution source	WATER QUANTITY; QUALITY; PERFORMANCE; STRATEGIES; AREA; SOIL	Green roofs are a new measure to control city nonpoint source pollution. The objective of this study was to examine the effects of substrate depth and biochar on the capacity of green roofs to intercept rainfall and reduce pollution in runoff. The amount and water quality of rainfall and the runoff from asphalt roofs (AR) and green roofs with or without biochar substrate were measured for 93 rain…	[Meng, Ruifang; Zhang, Qianqian; Wang, Huiwei] Chinese Acad Geol Sci, Inst Hydrogeol & Environm Geol, Hebei & China Geol Survey Key Lab Groundwater Rem, Shijiazhuang 050061, Hebei, Peoples R China; [Li, Dongsheng] Hebei Acad Forestry & Grassland Invest & Planning, Shijiazhuang 050051, Hebei, Peoples R China	China Geological Survey; Chinese Academy of Geological Sciences; Institute of Hydrogeology & Environmental Geology, Chinese Academy of Geological Sciences	Zhang, QQ (corresponding author), Chinese Acad Geol Sci, Inst Hydrogeol & Environm Geol, Hebei & China Geol Survey Key Lab Groundwater Rem, Shijiazhuang 050061, Hebei, Peoples R China.	z_qqian@163.com			open funds of state key laboratory of urban and region ecology of China [SKLURE201923]; Projects of China Geological Survey, China [DD20190336, DD20190331]; Commissioned Projects Institute of Land Survey and Planning of China [B202012]	open funds of state key laboratory of urban and region ecology of China; Projects of China Geological Survey, China; Commissioned Projects Institute of Land Survey and Planning of China	The study was funded by the open funds of state key laboratory of urban and region ecology of China (No.SKLURE201923) , the Projects of China Geological Survey, China (No. DD20190336 and DD20190331) , and the Commissioned Projects Institute of Land Survey and Planning of China (No. B202012) .		40	4	4	10	53	HARD	OLSZTYN 5	POST-OFFICE BOX, 10-718 OLSZTYN 5, POLAND	1230-1485	2083-5906		POL J ENVIRON STUD	Pol. J. Environ. Stud.		2021	30	5
C	Valagussa, M; Gatt, A; Tosca, A; Martinetti, L		Pennisi, G; Cremonini, L; Orsini, F; Gianquinto, GP		Valagussa, M.; Gatt, A.; Tosca, A.; Martinetti, L.			Green roof flood mitigation in the Mediterranean region	INTERNATIONAL SYMPOSIUM ON GREENER CITIES FOR MORE EFFICIENT ECOSYSTEM SERVICES IN A CLIMATE CHANGING WORLD	Acta Horticulturae		English	Proceedings Paper	International Symposium on Greener Cities for More Efficient Ecosystem Services in a Climate Changing World	SEP 12, 2017	Bologna, ITALY	Int Soc Hort Sci		growing media; runoff; coefficient of discharge; biochar	PERFORMANCE	Many studies have shown that green roofs provide a number of benefits to urban areas. Flood mitigation is one of such benefits, due to the potential of green roofs to absorb and retain precipitation. The volume of water retained by the substrate influences runoff. The depth and water content of the substrate also contribute to the extent by which flooding is mitigated. This study presents the res…	[Valagussa, M.] Minoprio Anal & Certificaz Srl, Vertemate Con Minoprio, Italy; [Gatt, A.] Univ Malta, Fac Built Environm, Msida, Malta; [Tosca, A.] Fdn Minoprio, Vertemate Con Minoprio, Italy; [Martinetti, L.] Univ Milan, Dept Agr & Environm Sci, Milan, Italy	University of Malta; 4EU+; University of Milan	Martinetti, L (corresponding author), Univ Milan, Dept Agr & Environm Sci, Milan, Italy.	livia.martinetti@unimi.it	Tosca, Alberto/AAR-3043-2021	Tosca, Alberto/0000-0002-6775-7855	EU LIFE 'LifeMedGreenRoof' project [LIFE12 ENV/MT/000732]	EU LIFE 'LifeMedGreenRoof' project	This project was partially funded by the EU LIFE 'LifeMedGreenRoof' project (LIFE12 ENV/MT/000732).		6	0	0	0	13	INT SOC HORTICULTURAL SCIENCE	LEUVEN 1	PO BOX 500, 3001 LEUVEN 1, BELGIUM	0567-7572	2406-6168	978-94-62612-12-9	ACTA HORTIC			2018	1215
J	Wilfong, MT; Casey, RE; Ownby, DR				Wilfong, Matthew T.; Casey, Ryan E.; Ownby, David R.			Performance of commercially available soil amendments for enhanced Cu attenuation in bioretention media	JOURNAL OF ENVIRONMENTAL MANAGEMENT			English	Article						Stormwater; Cu; Bioretention; Soil amendments; Zeolite	URBAN STORMWATER RUNOFF; BIOTIC LIGAND MODEL; HEAVY-METALS; COHO SALMON; COPPER; REMOVAL; TOXICITY; TECHNOLOGY; INDICATORS; SORPTION	Bioretention structures such as planter boxes, swales and rain gardens are being increasingly utilized in built landscapes as a strategy to attenuate both stormwater flows and contaminant loads. Copper (Cu) roofing materials contribute significantly higher mass loads of dissolved Cu per unit area than other surfaces such as parking lots and roadways. While a recent study demonstrated that convent…	[Wilfong, Matthew T.; Casey, Ryan E.; Ownby, David R.] Towson Univ, Urban Environm Biogeochem Lab UEBL, Towson, MD 21252 USA; [Wilfong, Matthew T.] Univ Maryland, Environm Sci & Technol Dept, College Pk, MD 20740 USA	University System of Maryland; Towson University; University System of Maryland; University of Maryland College Park	Ownby, DR (corresponding author), Towson Univ, Dept Chem, Towson, MD 21252 USA.	downby@towson.edu	Ownby, David/B-7688-2008	Ownby, David/0000-0001-8517-2044; Wilfong, Matthew/0000-0002-4416-9735	Copper Development Association [10730]; International Copper Association [ENV-25686]; Towson University Urban Environmental Biogeochemistry Laboratory (UEBL)	Copper Development Association; International Copper Association; Towson University Urban Environmental Biogeochemistry Laboratory (UEBL)	The Copper Development Association (project number 10730) and the International Copper Association (project number ENV-25686) funded this project. Support was provided by the Towson University Urban Environmental Biogeochemistry Laboratory (UEBL), with additional recognition for the help of Karah Hauser, Mark Monk, and Jeff Klupt. Towson University provided teaching and research assistantship sup…		37	1	1	3	17	ACADEMIC PRESS LTD- ELSEVIER SCIENCE LTD	LONDON	24-28 OVAL RD, LONDON NW1 7DX, ENGLAND	0301-4797	1095-8630		J ENVIRON MANAGE	J. Environ. Manage.	OCT 1	2021	295
J	Koivusalo, H; Dubovik, M; Wendling, L; Assmuth, E; Sillanpaa, N; Kokkonen, T				Koivusalo, Harri; Dubovik, Maria; Wendling, Laura; Assmuth, Eero; Sillanpaa, Nora; Kokkonen, Teemu			Performance of Sand and Mixed Sand-Biochar Filters for Treatment of Road Runoff Quantity and Quality	WATER			English	Article						stormwater; runoff; filter; road; hydrograph; water quality	POLLUTANT REMOVAL PERFORMANCE; WATER-QUALITY; STORMWATER; MEDIA; BIORETENTION; HYDROLOGY; BIOFILTER; RAINFALL; IMPACTS; DESIGN	Nature-based solutions and similar natural water retention measures to manage urban runoff are often implemented by cities in order to reduce runoff peaks, catch pollutants, and improve sustainability. However, the performance of these stormwater management solutions is relatively rarely assessed in detail prior to their construction, or monitored and evaluated following implementation. The objec…	[Koivusalo, Harri; Sillanpaa, Nora; Kokkonen, Teemu] Aalto Univ, Dept Built Environm, Sch Engn, POB 15200, FI-00076 Aalto, Finland; [Dubovik, Maria; Wendling, Laura] VTT Tech Res Ctr Finland, POB 1000, FI-02044 Espoo, Finland; [Assmuth, Eero; Sillanpaa, Nora] Sitowise, Linnoitustie 6, FI-02600 Espoo, Finland	Aalto University; VTT Technical Research Center Finland	Koivusalo, H (corresponding author), Aalto Univ, Dept Built Environm, Sch Engn, POB 15200, FI-00076 Aalto, Finland.	harri.koivusalo@aalto.fi	Koivusalo, Harri J/I-5555-2012; Wendling, Laura A/C-3660-2011; Wendling, Laura/A-2745-2014	Koivusalo, Harri J/0000-0002-3713-1579; Wendling, Laura/0000-0002-5728-3684; Dubovik, Maria/0000-0003-3889-5092					51	0	0	3	3	MDPI	BASEL	ST ALBAN-ANLAGE 66, CH-4052 BASEL, SWITZERLAND		2073-4441		WATER-SUI	Water	APR	2023	15	8
J	Ouedraogo, AS; Fu, GY; Yunus, AI				Ouedraogo, Angelika S.; Fu, George Yuzhu; Yunus, Ahmed I.			Treatment of Highway Stormwater Runoff Using Sustainable Biochar: A Review	JOURNAL OF ENVIRONMENTAL ENGINEERING			English	Review						Biochar; Highway stormwater runoff; Removal of pollutants; Suspended solids; Heavy metals	WASTE-WATER TREATMENT; STRAW-DERIVED BIOCHAR; AQUEOUS-SOLUTION; MAGNETIC BIOCHAR; CADMIUM REMOVAL; PYROLYSIS TEMPERATURE; ACTIVATED CARBON; CU(II) REMOVAL; COPPER REMOVAL; LEAD REMOVAL	Human activities and atmospheric deposits on highways have led to an increase of pollutants in highway stormwater runoff. The reduction of these pollutants to a minimum acceptance level has been a great subject of concern for the US Department of Transportation and US Environment Protection Agency. Researchers have investigated several methods; however, biochar utilization, an environmentally and…	[Ouedraogo, Angelika S.] Oklahoma State Univ, Dept Biosyst & Agr Engn, Stillwater, OK 74078 USA; [Fu, George Yuzhu] Georgia Southern Univ, Dept Civil Engn & Construct, POB 8077, Statesboro, GA 30458 USA; [Yunus, Ahmed I.] Georgia Southern Univ, Dept Civil Engn & Construct, Sci, Statesboro, GA 30458 USA	Oklahoma State University System; Oklahoma State University - Stillwater; University System of Georgia; Georgia Southern University; University System of Georgia; Georgia Southern University	Fu, GY (corresponding author), Georgia Southern Univ, Dept Civil Engn & Construct, POB 8077, Statesboro, GA 30458 USA.	gfu@georgiasouthern.edu			Department of Civil Engineering and Construction; College of Graduate Studies at Georgia Southern University	Department of Civil Engineering and Construction; College of Graduate Studies at Georgia Southern University	The authors acknowledge the support of the Department of Civil Engineering and Construction and the College of Graduate Studies at Georgia Southern University.		98	1	1	11	18	ASCE-AMER SOC CIVIL ENGINEERS	RESTON	1801 ALEXANDER BELL DR, RESTON, VA 20191-4400 USA	0733-9372	1943-7870		J ENVIRON ENG	J. Environ. Eng.-ASCE	FEB 1	2023	149	2
J	Lunt, PH; Fuller, K; Fox, M; Goodhew, S; Murphy, TR				Lunt, Paul H.; Fuller, Kate; Fox, Matthew; Goodhew, Steve; Murphy, Thomas R.			Comparing the thermal conductivity of three artificial soils under differing moisture and density conditions for use in green infrastructure	SOIL USE AND MANAGEMENT			English	Article						artificial soils; biochar; building thermal performance; green infrastructure; soil moisture; soil organic matter	ENERGY PERFORMANCE; LIVING WALLS; ROOFS; COMPONENTS; BENEFITS; GROWTH; DEPTH	Soil-based green infrastructure has the potential to improve building thermal performance and contribute to sustainable buildings. This study compares thermal conductivity response to soil moisture of three peat-free artificial soils to evaluate their potential use within green roofs and living walls. Thermal conductivity was measured with changing soil moisture and density. All soils showed high…	[Lunt, Paul H.; Murphy, Thomas R.] Univ Plymouth, Sch Geog Earth & Environm Sci, Plymouth PL4 8AA, Devon, England; [Fuller, Kate] Royal HaskoningDHV, London, England; [Fox, Matthew; Goodhew, Steve] Univ Plymouth, Sch Art Design & Architecture, Plymouth, Devon, England	University of Plymouth; University of Plymouth	Lunt, PH (corresponding author), Univ Plymouth, Sch Geog Earth & Environm Sci, Plymouth PL4 8AA, Devon, England.	paul.lunt@plymouth.ac.uk		Goodhew, Steve/0000-0003-1227-217X	European Regional Development Fund; HM government	European Regional Development Fund(European Union (EU)); HM government	European Regional Development Fund; HM government		43	0	0	8	14	WILEY	HOBOKEN	111 RIVER ST, HOBOKEN 07030-5774, NJ USA	0266-0032	1475-2743		SOIL USE MANAGE	Soil Use Manage.	JAN	2023	39	1
J	Vu, CT; Wu, TT				Chi Thanh Vu; Wu, Tingting			Engineered multifunctional sand for enhanced removal of stormwater runoff contaminants in fixed-bed column systems	CHEMOSPHERE			English	Article						Multifunctional engineered sand; Stormwater management; Surface runoff; Multiple contaminants; Column flow-through experiments	ESCHERICHIA-COLI REMOVAL; GRAPHENE OXIDE; HEAVY-METALS; ORGANIC CONTAMINANTS; ADSORPTION; WATER; BIOCHAR; POLLUTANTS; PHOSPHATE; SORPTION	The degradation of surface water quality in the US is mostly contributed by nonpoint-source pollution, in which stormwater runoff plays a major role. Stormwater runoff pollution is difficult to control due to its diffuse and stochastic loading. In this study, multifunctional Al-Mg/GO engineered sand synthesized via a simple method was used to address four major categories of runoff contaminants, …	[Chi Thanh Vu; Wu, Tingting] Univ Alabama, Civil & Environm Engn Dept, Huntsville, AL 35899 USA	University of Alabama System; University of Alabama Huntsville	Wu, TT (corresponding author), Univ Alabama, Civil & Environm Engn Dept, Huntsville, AL 35899 USA.	Tingting.Wu@uah.edu		Vu, Chi-Thanh/0000-0003-1897-8931	Alabama Graduate Research Scholars Program (GRSP) through the Alabama Commission for Higher Education	Alabama Graduate Research Scholars Program (GRSP) through the Alabama Commission for Higher Education	C. T. Vu acknowledges financial support from the Alabama Graduate Research Scholars Program (GRSP) funded through the Alabama Commission for Higher Education and administered by the Alabama EPSCoR. The authors acknowledge the assistance of Mr. Amir Ahmadi in SEM-EDS analysis, of Mr. Zhuoran Gan and Dr. Yu Lei with BET analysis, and of Dr. Bernhard Vogler in FTIR measurement.		72	26	27	1	32	PERGAMON-ELSEVIER SCIENCE LTD	OXFORD	THE BOULEVARD, LANGFORD LANE, KIDLINGTON, OXFORD OX5 1GB, ENGLAND	0045-6535	1879-1298		CHEMOSPHERE	Chemosphere	JUN	2019	224
J	Cheng, Y; Vaccari, DA; Johannesson, BG; Fassman-Beck, E				Cheng, Yang; Vaccari, David A.; Johannesson, Birgitte G.; Fassman-Beck, Elizabeth			Multiyear Study on Phosphorus Discharge from Extensive Sedum Green Roofs with Substrate Amendments	JOURNAL OF SUSTAINABLE WATER IN THE BUILT ENVIRONMENT			English	Article						Green roof; Phosphorus; Zeolite; Biocher; Stormwater; Nonpoint-source pollution; Green infrastructure; Low impact development (LID)	RUNOFF WATER; STORMWATER RUNOFF; FILTER MATERIALS; AIR-POLLUTION; REMOVAL; SORPTION; QUALITY; AMMONIUM; PERFORMANCE; RETENTION	Green roofs are implemented for providing urban ecosystem services like stormwater management, but they have also been identified as a potentially significant source of phosphorus in the runoff, which may cause concern for downstream water quality. A multiyear evaluation of phosphorus in green roof discharge and alternatives for phosphorus mitigation was conducted using 32 pilot-scale experimenta…	[Cheng, Yang; Vaccari, David A.] Stevens Inst Technol, Dept Civil Environm & Ocean Engn, Hoboken, NJ 07030 USA; [Johannesson, Birgitte G.] Trondheim Municipal, Dept Municipal Engn, N-7004 Trondheim, Norway; [Fassman-Beck, Elizabeth] Southern Calif Coastal Water Res Project, Cross Dept Tech Support, 3535 Harbor Blvd,Suite 110, Costa Mesa, CA 92626 USA	Stevens Institute of Technology; Southern California Coastal Water Research Project	Cheng, Y (corresponding author), Stevens Inst Technol, Dept Civil Environm & Ocean Engn, Hoboken, NJ 07030 USA.	ycheng21@stevens.edu			Washington DC Department of Energy and Environment (DOEE); Emory Knoll Farms (Street, Maryland); St. Cloud Minerals (Winston, New Mexico); Stancill's Ltd. (Perryville, Maryland)	Washington DC Department of Energy and Environment (DOEE); Emory Knoll Farms (Street, Maryland); St. Cloud Minerals (Winston, New Mexico); Stancill's Ltd. (Perryville, Maryland)	The authors would like to thank Stevens Institute of Technology's Pinnacle Scholars program, particularly including undergraduate researchers Sarah Chan, Samantha Conte, Devin Dragon, Daniel Rosenberger, Katerina Slesarevich, and Dylan Walsh and Stevens Facilities Management, especially Robert Maffia and Richard Snyder. Likewise, gratitude is extended to Washington DC Department of Energy and Env…		64	1	1	5	11	ASCE-AMER SOC CIVIL ENGINEERS	RESTON	1801 ALEXANDER BELL DR, RESTON, VA 20191-4400 USA	2379-6111			J SUSTAIN WATER BUIL	J. Sustain. Water Built Environ.	NOV 1	2022	8	4
J	Liao, WX; Drake, J; Thomas, SC				Liao, Wenxi; Drake, Jennifer; Thomas, Sean C.			Biochar granulation, particle size, and vegetation effects on leachate water quality from a green roof substrate	JOURNAL OF ENVIRONMENTAL MANAGEMENT			English	Article						Charcoal; Post-processing; Stormwater management; Plant performance; Green infrastructure; Water quality index	DRUM GRANULATION; PLANT-GROWTH; RUNOFF; QUANTITY; AVAILABILITY; RETENTION; BENEFITS; IMPACTS; SOILS	Biochar, due to its favourable physiochemical properties, has been promoted as an ideal substrate additive on green roofs, with potential benefits to hydrological function. However, biochar is susceptible to water erosion, which may result in biochar loss and water pollution. The use of granulated biochars or biochars in large particle sizes could potentially alleviate biochar erosion loss, but e…	[Liao, Wenxi; Thomas, Sean C.] Univ Toronto, Inst Forestry & Conservat, John Daniels Fac Architecture Landscape & Design H, 33 Willcocks St, Toronto, ON 533, Canada; [Drake, Jennifer] Univ Toronto, Dept Civil & Mineral Engn, 35 St George St, Toronto, ON 514, Canada	University of Toronto; University of Toronto	Liao, WX (corresponding author), Univ Toronto, Inst Forestry & Conservat, John Daniels Fac Architecture Landscape & Design H, 33 Willcocks St, Toronto, ON 533, Canada.	wenxi.liao@mail.utoronto.ca	Liao, Wenxi/HYB-9872-2023	Liao, Wenxi/0000-0001-6600-4395	Natural Sciences and Engineering Research Council of Canada (NSERC) Collaborative Research and Training Experience Program (CREATE); NSERC Discovery Grants Program	Natural Sciences and Engineering Research Council of Canada (NSERC) Collaborative Research and Training Experience Program (CREATE)(Natural Sciences and Engineering Research Council of Canada (NSERC)); NSERC Discovery Grants Program(European Research Council (ERC)Natural Sciences and Engineering Research Council of Canada (NSERC))	We thank Tian Kong for assistance with data collection, and Titan Clean Energy Projects Co., GroBark Inc., and Bioroof Systems Inc. For providing experimental materials and relevant product information. This research was funded by Natural Sciences and Engineering Research Council of Canada (NSERC) Collaborative Research and Training Experience Program (CREATE) to Jennifer Drake and Sean C. Thomas…		53	4	4	11	25	ACADEMIC PRESS LTD- ELSEVIER SCIENCE LTD	LONDON	24-28 OVAL RD, LONDON NW1 7DX, ENGLAND	0301-4797	1095-8630		J ENVIRON MANAGE	J. Environ. Manage.	SEP 15	2022	318
J	Rukhaiyar, S; Huang, S; Song, HH; Lin, P; Garg, A; Bordoloi, S				Rukhaiyar, Saurav; Huang, Shan; Song, Haihong; Lin, Peng; Garg, Ankit; Bordoloi, Sanandam			A New Intelligent Model for Computing Crack in Compacted Soil-Biochar Mix: Application in Green Infrastructure	GEOTECHNICAL AND GEOLOGICAL ENGINEERING			English	Article						Biochar; Soil-biochar mix; ANN model; Green infrastructure; Cracking	ARTIFICIAL NEURAL-NETWORK; RICE-HUSK BIOCHAR; PHYSICAL-PROPERTIES; WATER-RETENTION; DESICCATION; REGRESSION; PREDICTION; BEHAVIOR; IMPACT; CLAY	There have been studies analysing water retention and cracking in soil-biochar mix, but there is lack of model for estimating cracking in these kind of mixture. These models can be useful as it can be directly inputted in governing equations of seepage analysis for further analysing stability of green infrastructure. The objective of this study is to develop a model for computing crack as functio…	[Rukhaiyar, Saurav; Huang, Shan] Guangxi Univ, Coll Civil Engn, Architecture, Nanning, Peoples R China; [Rukhaiyar, Saurav] Cent Inst Min, Rock Mech Lab, CSIR, Fuel Res, Dhanbad, India; [Song, Haihong; Lin, Peng; Garg, Ankit; Bordoloi, Sanandam] Shantou Univ, Guangdong Engn Ctr Struct Safety, Hlth Monitoring, Shantou, Peoples R China	Guangxi University; Council of Scientific & Industrial Research (CSIR) - India; Shantou University	Huang, S (corresponding author), Guangxi Univ, Coll Civil Engn, Architecture, Nanning, Peoples R China.	huangshan_hs@qq.com	garg, ankit/AAH-9210-2019; Bordoloi, Sanandam/AAQ-6130-2020	garg, ankit/0000-0001-5377-8519;					52	4	4	0	10	SPRINGER	DORDRECHT	VAN GODEWIJCKSTRAAT 30, 3311 GZ DORDRECHT, NETHERLANDS	0960-3182	1573-1529		GEOTECH GEOL ENG	Geotech. Geol. Eng.	JAN	2020	38	1
C	Farrell, C; Cao, CTN; Ang, XQ; Rayner, JP		Groening, G; Moore, GM; Rayner, JP; Moore, EEF		Farrell, C.; Cao, C. T. N.; Ang, X. Q.; Rayner, J. P.			Use of water-retention additives to improve performance of green roof substrates	XXIX INTERNATIONAL HORTICULTURAL CONGRESS ON HORTICULTURE: SUSTAINING LIVES, LIVELIHOODS AND LANDSCAPES(IHC2014): V INTERNATIONAL CONFERENCE ON LANDSCAPE AND URBAN HORTICULTURE AND INTERNATIONAL SYMPOSIUM ON SUSTAINABLE MANAGEMENT IN THE URBAN FOREST	Acta Horticulturae		English	Proceedings Paper	29th International Horticultural Congress on Horticulture - Sustaining Lives, Livelihoods and Landscapes (IHC) / 5th International Conference on Landscape and Urban Horticulture / International Symposium on Sustainable Management in the Urban Forest	AUG 17-22, 2014	Brisbane, AUSTRALIA	Int Soc Hort Sci		biochar; hydrogel; living roof; stormwater; moisture retention; matric potential; plant available	PHYSICAL-PROPERTIES; GROWTH; BIOCHAR; SOIL; AMENDMENT; DROUGHT; IMPACT	Green roofs provide an opportunity to make our cities more liveable by reducing the impact of urban stormwater runoff through the combined effects of substrates (growing media) absorbing rainfall and plants using water. Stormwater retention is determined by substrate's ability to absorb and store water (water holding capacity; WHC) and supply it to plants (plant available water; PAW). As green ro…	[Farrell, C.; Cao, C. T. N.; Ang, X. Q.; Rayner, J. P.] Univ Melbourne, Green Infrastruct Res Grp, Melbourne Sch Land & Environm, Melbourne, Vic, Australia; [Cao, C. T. N.] Nong Lam Univ, Linh Trung Ward, Sch Environm & Resources, Ho Chi Minh City, Vietnam; [Ang, X. Q.] Natl Pk Board,1 Cluny Rd, Singapore, Singapore	University of Melbourne; Nong Lam University	Farrell, C (corresponding author), Univ Melbourne, Green Infrastruct Res Grp, Melbourne Sch Land & Environm, Melbourne, Vic, Australia.	c.farrell@unimelb.edu.au		Rayner, John/0000-0002-8734-8725					29	7	7	3	30	INT SOC HORTICULTURAL SCIENCE	LEUVEN 1	PO BOX 500, 3001 LEUVEN 1, BELGIUM	0567-7572	2406-6168	978-94-62611-02-3	ACTA HORTIC			2016	1108
J	Zuniga-Estrada, MA; Vazquez-Rodriguez, GA; Ramirez-Cardona, M; Lizarraga-Mendiola, L				Antonio Zuniga-Estrada, Marcelino; Vazquez-Rodriguez, Gabriela A.; Ramirez-Cardona, Marius; Lizarraga-Mendiola, Liliana			Mineralogical evidence of unfavorable geochemical interactions between urban runoff pollutants and filter materials in low-impact systems	JOURNAL OF HAZARDOUS MATERIALS			English	Article						Urban runoff; Heavy metals; Bioretention; Low-impact development; Infiltration	WATER; REMOVAL; EQUILIBRIUM; MANAGEMENT; EFFICIENCY; AQUIFER; BIOCHAR; MEDIA; LEAD; SOIL	We report on the geochemical interactions between a synthetic urban runoff (SUR) and the minerals of materials used in a multi-layered column filter (soil, sand, gravel, and tezontle) at the laboratory scale, which mimicked an unvegetated low-impact development (LID) system. After five 8 h infiltration cycles using the SUR, the average concentrations of Pb and Mn decreased slightly at the column …	[Antonio Zuniga-Estrada, Marcelino; Vazquez-Rodriguez, Gabriela A.] Univ Autonoma Estado Hidalgo, Area Acad Quim, Km 4-5,Carr Pachuca Tulancingo, Mineral De La Reforma 42086, Hidalgo, Mexico; [Ramirez-Cardona, Marius] Area Acad Ciencias Tierra & Mat Address Asa, Guanajuato, Mexico; [Lizarraga-Mendiola, Liliana] Area Acad Ingn & Arquitectura Address Asa, Guanajuato, Mexico	Universidad Autonoma del Estado de Hidalgo	Lizarraga-Mendiola, L (corresponding author), Area Acad Ingn & Arquitectura Address Asa, Guanajuato, Mexico.	lililga.lm@gmail.com	Vázquez Rodríguez, Gabriela Alejandra/ISA-8551-2023; Vazquez, Gabriela/F-6446-2013; Vázquez-Rodríguez, Gabriela/AAQ-8471-2020; Ramirez-Cardona, Marius/H-5330-2019	Vazquez, Gabriela/0000-0001-8351-8451; Vázquez-Rodríguez, Gabriela/0000-0001-8351-8451; Ramirez-Cardona, Marius/0000-0003-4376-3377; Zuniga-Estrada, Marcelino Antonio/0000-0003-1040-9670; Lizarraga-Mendiola, Liliana/0000-0001-6320-8923	Consejo Nacional de Ciencia y Tecnologia (CONACYT-Mexico)	Consejo Nacional de Ciencia y Tecnologia (CONACYT-Mexico)(Consejo Nacional de Ciencia y Tecnologia (CONACyT))	Marcelino Antonio Zuniga-Estrada acknowledges the PhD scholarship provided by the Consejo Nacional de Ciencia y Tecnologia (CONACYT-Mexico). All the authors thank the insightful comments and help of Dr. Azdrubal Lobo-Guerrero concerning the interpretation of the PXRD results. The authors would like to thank the reviewers and editors for their comments which helped in improving the manuscript.		44	2	2	2	33	ELSEVIER	AMSTERDAM	RADARWEG 29, 1043 NX AMSTERDAM, NETHERLANDS	0304-3894	1873-3336		J HAZARD MATER	J. Hazard. Mater.	MAY 15	2020	390
J	Petreje, M; Snehota, M; Chorazy, T; Novotny, M; Rybova, B; Heckova, P				Petreje, Marek; Snehota, Michal; Chorazy, Tomas; Novotny, Michal; Rybova, Barbora; Heckova, Petra			Performance study of an innovative concept of hybrid constructed wetland-extensive green roof with growing media amended with recycled materials	JOURNAL OF ENVIRONMENTAL MANAGEMENT			English	Article						Green roof; Constructed wetland; Biochar; Demolition waste; Recycled material; Greywater; Evapotranspiration	WATER-RETENTION; PLANT-GROWTH; SUBSTRATE; BIOCHAR; RUNOFF; TEMPERATURE; GREYWATER; SOIL; MOISTURE; MODEL	Implementation of green roofs requires a large amount of primary material, especially for constructing the growing media layer. In addition, irrigation of green roofs with potable water is uneconomical and unsustainable. The novel hybrid green roof system proposed in this paper is in line with the principles of circular economy as it incorporates recycled materials into green roof growing media a…	[Petreje, Marek; Snehota, Michal; Heckova, Petra] Czech Tech Univ, Fac Civil Engn, Thakurova 7, Prague 6, Czech Republic; [Petreje, Marek; Snehota, Michal; Rybova, Barbora; Heckova, Petra] Czech Tech Univ, Univ Ctr Energy Efficient Bldg, Trinecka 1024, Bustehrad 27343, Czech Republic; [Chorazy, Tomas; Novotny, Michal] Brno Univ Technol, Fac Civil Engn, AdMaS Res Ctr, Purkynova 651-139, Brno 61200…	Czech Technical University Prague; Czech Technical University Prague; Brno University of Technology	Petreje, M (corresponding author), Czech Tech Univ, Fac Civil Engn, Thakurova 7, Prague 6, Czech Republic.	marek.petreje@fsv.cvut.cz	Novotný, Michal/HLP-7849-2023	Novotný, Michal/0000-0002-8263-356X; Heckova, Petra/0000-0003-4127-5855; Chorazy, Tomas/0000-0002-4778-0708; Snehota, Michal/0000-0001-8849-177X; Petreje, Marek/0000-0002-1990-9447	Technology Agency of the Czech Republic [TN01000056/03]; Czech Science Foundation of the Czech Republic [22-25673S]; Grant Agency of the Czech Technical University in Prague [SGS20/157/OHK1/3T/11]	Technology Agency of the Czech Republic; Czech Science Foundation of the Czech Republic(Grant Agency of the Czech Republic); Grant Agency of the Czech Technical University in Prague	The research has been conducted within the framework of the Centre for Advanced Materials and Efficient Buildings, project no. TN01000056/03, funded by Technology Agency of the Czech Republic. The study of the flow in the dual layer green roof was supported by Czech Science Foundation of the Czech Republic under grant no. 22-25673S. It was also supported by the Grant Agency of the Czech Technical…		95	2	2	8	8	ACADEMIC PRESS LTD- ELSEVIER SCIENCE LTD	LONDON	24-28 OVAL RD, LONDON NW1 7DX, ENGLAND	0301-4797	1095-8630		J ENVIRON MANAGE	J. Environ. Manage.	APR 1	2023	331
J	Cao, CTN; Farrell, C; Kristiansen, PE; Rayner, JP				Cao, Cuong T. N.; Farrell, Claire; Kristiansen, Paul E.; Rayner, John P.			Biochar makes green roof substrates lighter and improves water supply to plants	ECOLOGICAL ENGINEERING			English	Article						Substrate amendment; Water retention additive; Organic matter; Living roof; Stormwater; Scoria	PHYSICAL-PROPERTIES; SOIL; RUNOFF; GROWTH; CARBON; RETENTION; PRODUCTIVITY; PERFORMANCE; FERTILITY; INCREASES	Green roofs are increasingly being built to manage stormwater runoff in cities. Water-retention additives such as biochar could be a useful way of increasing substrate water holding capacity (WHC) and therefore stormwater retention without increasing substrate weight loading. If this also increases plant available water (PAW), plant selection could be expanded to species with higher water use, fu…	[Cao, Cuong T. N.; Farrell, Claire; Rayner, John P.] Univ Melbourne, Melbourne Sch Land & Environm, Richmond, Vic 3121, Australia; [Cao, Cuong T. N.] Nong Lam Univ, Sch Environm & Resources, Ho Chi Minh City, Vietnam; [Kristiansen, Paul E.] Univ New England, Sch Environm & Rural Sci, Armidale, NSW 2351, Australia	University of Melbourne; Nong Lam University; University of New England	Farrell, C (corresponding author), Univ Melbourne, Melbourne Sch Land & Environm, Burnley Campus,500 Yarra Blvd, Richmond, Vic 3121, Australia.	c.farrell@unimelb.edu.au	Kristiansen, Paul/X-6638-2019	Kristiansen, Paul/0000-0003-2116-0663; Rayner, John/0000-0002-8734-8725; Farrell, Claire/0000-0002-5822-7529	AusAID Australian Development Scholarship program; University of Melbourne	AusAID Australian Development Scholarship program; University of Melbourne(University of Melbourne)	We thank Susan Murphy, Sascha Andrusiak, Nick Osborne, and Rebecca White for technical assistance during the experiment. This research was funded by the AusAID Australian Development Scholarship program and the University of Melbourne.		72	97	107	5	159	ELSEVIER	AMSTERDAM	RADARWEG 29, 1043 NX AMSTERDAM, NETHERLANDS	0925-8574	1872-6992		ECOL ENG	Ecol. Eng.	OCT	2014	71
J	Wang, H; Zhang, KX; Gan, L; Liu, JQ; Mei, GX				Wang, Hao; Zhang, Kexin; Gan, Lin; Liu, Jiaqin; Mei, Guoxiong			Expansive soil-biochar-root-water-bacteria interaction: Investigation on crack development, water management and plant growth in green infrastructure	INTERNATIONAL JOURNAL OF DAMAGE MECHANICS			English	Article						Biochar; crack intensity factor; green infrastructure; green roof; expansive soil		The objectives of the study are to explore fundamental mechanism of expansive soil-biochar-root-water-bacteria interaction, and investigate crack development and hydraulic properties of biochar amended soils aiming at green infrastructures. The physical, chemical and biological effects of biochar on expansive soil have been comprehensively explored. Crack development is investigated quantificatio…	[Wang, Hao; Zhang, Kexin; Gan, Lin; Liu, Jiaqin; Mei, Guoxiong] Guangxi Univ, Coll Civil Engn & Architecture, Nanning, Peoples R China; [Wang, Hao; Zhang, Kexin; Gan, Lin; Liu, Jiaqin; Mei, Guoxiong] Guangxi Univ, Key Lab Disaster Prevent & Struct Safety, Minist Educ, Nanning, Peoples R China; [Wang, Hao; Zhang, Kexin; Gan, Lin; Liu, Jiaqin; Mei, Guoxiong] Key Lab Disaster Prevent & Mitigat & Eng…	Guangxi University; Guangxi University	Mei, GX (corresponding author), Guangxi Univ, Univ East Rd, Nanning 530004, Guangxi, Peoples R China.	meiguox@163.com		Wang, Hao/0000-0003-2130-3994					60	10	10	7	58	SAGE PUBLICATIONS LTD	LONDON	1 OLIVERS YARD, 55 CITY ROAD, LONDON EC1Y 1SP, ENGLAND	1056-7895	1530-7921		INT J DAMAGE MECH	Int. J. Damage Mech.	APR	2021	30	4
J	Kader, S; Chadalavada, S; Jaufer, L; Spalevic, V; Dudic, B				Kader, Shuraik; Chadalavada, Sreenivasulu; Jaufer, Lizny; Spalevic, Velibor; Dudic, Branislav			Green roof substrates-A literature review	FRONTIERS IN BUILT ENVIRONMENT			English	Review						green roof; substrates; physico-chemical properties; sustainable ecosystem; critical review; research gaps	THERMAL-CONDUCTIVITY; ELECTRICAL-CONDUCTIVITY; VEGETATION COMPOSITION; PLANT PERFORMANCE; DROUGHT TOLERANCE; WATER RUNOFF; SOIL; GROWTH; BIOCHAR; MOISTURE	Green roofs are becoming increasingly popular in urban construction due to their wide array of benefits for creating a sustainable ecosystem. Many stakeholders invest in green roofs in the 21st century to enhance the environmental quality and mitigate urban ecological pollution. The substrate layer is the most important and critical component of green roof systems. The objective of the review stu…	[Kader, Shuraik] Sri Lanka Inst Informat Technol, Dept Civil Engn, Malabe, Sri Lanka; [Chadalavada, Sreenivasulu] Univ Southern Queensland, Sch Engn, Toowoomba, Qld, Australia; [Jaufer, Lizny] Liverpool John Moores Univ, Sch Architecture, Liverpool, Merseyside, England; [Spalevic, Velibor] Univ Montenegro, Biotech Fac, Podgorica, Montenegro; [Dudic, Branislav] Comenius Univ, Fac Management, Brati…	Sri Lanka Institute of Information Technology (SLIIT); University of Southern Queensland; Liverpool John Moores University; University of Montenegro; Comenius University Bratislava	Dudic, B (corresponding author), Comenius Univ, Fac Management, Bratislava, Slovakia.;Dudic, B (corresponding author), Univ Business Acad, Fac Econ & Engn Management, Novi Sad, Serbia.	branislav.dudic@fm.uniba.sk	Kader, Shuraik/GPK-7813-2022	Kader, Shuraik/0000-0002-2907-5327	South Eastern University of Sri Lanka; [2022/1-6]	South Eastern University of Sri Lanka;	All the running costs are covered by the South Eastern University of Sri Lanka (budget for 2022/1-6).		157	4	4	14	19	FRONTIERS MEDIA SA	LAUSANNE	AVENUE DU TRIBUNAL FEDERAL 34, LAUSANNE, CH-1015, SWITZERLAND		2297-3362		FRONT BUILT ENVIRON	Front. Built Environ.	OCT 3	2022	8
J	Ali, MA; Pickering, NB				Ali, Md. Arafat; Pickering, Nigel B.			Systematic Evaluation of Materials to Enhance Soluble Phosphorus Removal Using Biofiltration or Bioswale Stormwater Management Controls	JOURNAL OF SUSTAINABLE WATER IN THE BUILT ENVIRONMENT			English	Article							LAYERED DOUBLE HYDROXIDES; PHOSPHATE REMOVAL; WASTE-WATER; AQUEOUS-SOLUTIONS; RECEIVING WATERS; ADSORPTION; MECHANISMS; CAPACITY; NITROGEN; BIOCHAR	Significant environmental impact can be caused by surface runoff when it transports excessive phosphorus (P) to downstream surface waters. Excessive P can cause uncontrolled aquatic plant growth, low dissolved oxygen, and increased fish mortality. Urban stormwater is composed of both dissolved and particulate P fractions in roughly equal proportions. Many stormwater management controls (SMCs) lik…	[Ali, Md. Arafat] Washington State Univ, Dept Civil & Environm Engn, PACCAR Bldg,2001 Grimes Way, Pullman, WA 99164 USA; [Ali, Md. Arafat] Univ Buffalo, Dept Civil Struct & Environm Engn, North Campus,Jarvis Hall,Room 204, Buffalo, NY 14228 USA; [Pickering, Nigel B.] Washington State Univ, Washington Stormwater Ctr, 254 PACCAR Bldg,2001 Grimes Way, Pullman, WA 99164 USA; [Pickering, Nigel B.] Geo…	Washington State University; State University of New York (SUNY) System; State University of New York (SUNY) Buffalo; Washington State University	Pickering, NB (corresponding author), Washington State Univ, Washington Stormwater Ctr, 254 PACCAR Bldg,2001 Grimes Way, Pullman, WA 99164 USA.;Pickering, NB (corresponding author), Geosyntec Consultants, 100 S Washington Ave 1590, Minneapolis, MN 55401 USA.	mdarafat@buffalo.edu; npickering@geosyntec.com		Ali, Md. Arafat/0000-0002-5091-4893	Washington State Department of Transportation (WSDOT); Horizon Foundation	Washington State Department of Transportation (WSDOT); Horizon Foundation	The Washington State Department of Transportation (WSDOT) provided the research funding for this project. Additional funds from the Horizon Foundation allowed travel and conference participation for this work. Many people assisted with this project, and we thank them wholeheartedly. John Stark, Professor and Director, Washington Stormwater Center, WSU for WSC, provided support for the project and…		59	1	1	1	3	ASCE-AMER SOC CIVIL ENGINEERS	RESTON	1801 ALEXANDER BELL DR, RESTON, VA 20191-4400 USA	2379-6111			J SUSTAIN WATER BUIL	J. Sustain. Water Built Environ.	FEB 1	2023	9	1
J	Wang, JQ; Manning, DAC; Stirling, R; Lopez-Capel, E; Werner, D				Wang, Jiaqian; Manning, David A. C.; Stirling, Ross; Lopez-Capel, Elisa; Werner, David			Biochar benefits carbon off-setting in blue-green infrastructure soils- A lysimeter study	JOURNAL OF ENVIRONMENTAL MANAGEMENT			English	Article						Carbon sequestration; Soil; Wheat straw; Biochar; Sustainable urban drainage systems (SuDS)	LABILE ORGANIC-CARBON; WHEAT-STRAW; TREE GROWTH; MAIZE; SEQUESTRATION; EMISSIONS; RESPONSES; INCREASE; NITROGEN; QUALITY	Carbon sequestration with amendments in blue-green infrastructure soils could off-set anthropogenic greenhouse gas emissions to alleviate climate change. In this 3-year study, the effects of wheat straw and its biochar on carbon sequestration in an urban landscaping soil were investigated under realistic outdoor conditions using two large-scale lysimeters. Both amendments were carried out by inco…	[Wang, Jiaqian; Stirling, Ross; Werner, David] Newcastle Univ, Sch Engn, Newcastle upon Tyne, England; [Manning, David A. C.; Lopez-Capel, Elisa] Newcastle Univ, Sch Nat & Environm Sci, Newcastle upon Tyne, England	Newcastle University - UK; Newcastle University - UK	Werner, D (corresponding author), Newcastle Univ, Sch Engn, Newcastle upon Tyne, England.	david.werner@newcastle.ac.uk		Stirling, Ross/0000-0002-0069-6621; Werner, David/0000-0002-6741-1256	UK?s Engineering and Physical Sciences Research Council (EPSRC); [EP/R010102/1]	UK?s Engineering and Physical Sciences Research Council (EPSRC)(UK Research & Innovation (UKRI)Engineering & Physical Sciences Research Council (EPSRC));	Funding This work was supported by the UK?s Engineering and Physical Sciences Research Council (EPSRC) via the UKCRIC National Green Infrastructure Facility (grant number EP/R010102/1) .		69	2	2	18	31	ACADEMIC PRESS LTD- ELSEVIER SCIENCE LTD	LONDON	24-28 OVAL RD, LONDON NW1 7DX, ENGLAND	0301-4797	1095-8630		J ENVIRON MANAGE	J. Environ. Manage.	JAN 1	2023	325		B
J	Werdin, J; Conn, R; Fletcher, TD; Rayner, JP; Williams, NSG; Farrell, C				Werdin, Joerg; Conn, Richard; Fletcher, Tim D.; Rayner, John P.; Williams, Nicholas S. G.; Farrell, Claire			Biochar particle size and amendment rate are more important for water retention and weight of green roof substrates than differences in feedstock type	ECOLOGICAL ENGINEERING			English	Article						Field capacity; Plant available water; Porosity; Water holding capacity; Weight loading; Wood density	PLANT-AVAILABLE WATER; HYDROLOGICAL PROPERTIES; STORMWATER RETENTION; GROWING MEDIA; SOIL; MOISTURE; IMPACT; PERFORMANCE; CATCHMENT; QUANTITY	Green roofs are an effective green infrastructure tool to reduce stormwater runoff in cities, but their considerable weight is a constraint on widespread uptake. Consequently, lightweight green roof substrates with high water retention are desirable. Biochar addition to green roof substrates may reduce green roof weight and improve stormwater retention by increasing water holding capacity. Howeve…	[Werdin, Joerg; Conn, Richard; Fletcher, Tim D.; Rayner, John P.; Williams, Nicholas S. G.; Farrell, Claire] Univ Melbourne, Fac Sci, Sch Ecosyst & Forest Sci, 500 Yarra Blvd, Richmond, Vic 3121, Australia	University of Melbourne	Werdin, J (corresponding author), Univ Melbourne, Fac Sci, Sch Ecosyst & Forest Sci, 500 Yarra Blvd, Richmond, Vic 3121, Australia.	joerg.werdin@unimelb.edu.au	Williams, Nicholas SG/H-3408-2015	Williams, Nicholas SG/0000-0001-6291-9483	Australian Research Council - Melbourne Water [LP30100731]; Inner Melbourne Action Plan (IMAP) group of local governments	Australian Research Council - Melbourne Water(Australian Research Council); Inner Melbourne Action Plan (IMAP) group of local governments	This research was funded by an Australian Research Council Linkage Grant (LP30100731) supported by Melbourne Water and the Inner Melbourne Action Plan (IMAP) group of local governments. Joerg Werdin was supported by a Research Training Program Scholarship and a Graduate Research Studentship. We thank Dr. Adrian Morphett and Moana Quiatol from Earth Systems for their help producing the biochar and…		78	15	16	7	41	ELSEVIER	AMSTERDAM	RADARWEG 29, 1043 NX AMSTERDAM, NETHERLANDS	0925-8574	1872-6992		ECOL ENG	Ecol. Eng.	NOV	2021	171
J	Bao, X; Li, MQ; Niu, RJ; Lu, JL; Panigrahi, S; Garg, A; Berretta, C				Bao, Xia; Li, Manqi; Niu, Renjie; Lu, Jinling; Panigrahi, Sagarika; Garg, Ankit; Berretta, Christian			Hygroscopic Water Retention and Physio-Chemical Properties of Three In-House Produced Biochars from Different Feedstock Types: Implications on Substrate Amendment in Green Infrastructure	WATER			English	Article						biochar; pyrolysis; agricultural waste management; surface characteristic; green infrastructure; soil amendments	PYROLYSIS CONDITIONS; CHEMICAL-PROPERTIES; ACTIVATED CARBON; AQUEOUS-SOLUTION; SLOW PYROLYSIS; SEWAGE-SLUDGE; POTENTIAL USE; SOIL; TEMPERATURE; IMPACT	Recent studies have proposed usage of biochar as a substrate amendment in green infrastructure, such as green roofs and bio-filtration units. However, understanding of the variation in physio-chemical properties of biochar due to the production process and feedstock is still lacking. The present study investigated the effects of pyrolysis temperature and feedstocks on the hygroscopic water conten…	[Bao, Xia; Li, Manqi; Niu, Renjie; Lu, Jinling; Garg, Ankit] Shantou Univ, Dept Civil & Environm Engn, Guangdong Engn Ctr Struct Safety & Hlth Monitorin, Shantou 515063, Peoples R China; [Panigrahi, Sagarika] Sree Vidyanikethan Engn Coll, Dept Civil Engn, Tirupati 517102, Andhra Pradesh, India; [Berretta, Christian] Univ Leeds, Sch Civil Engn, Leeds LS2 9JT, W Yorkshire, England	Shantou University; University of Leeds	Garg, A (corresponding author), Shantou Univ, Dept Civil & Environm Engn, Guangdong Engn Ctr Struct Safety & Hlth Monitorin, Shantou 515063, Peoples R China.	20xbao1@stu.edu.cn; 18mqli3@stu.edu.cn; 18rjniu@stu.edu.cn; 19jllu@stu.edu.cn; panigrahisagarika1@gmail.com; ankit@stu.edu.cn; c.berretta@leeds.ac.uk	garg, ankit/AAH-9210-2019	garg, ankit/0000-0001-5377-8519; Berretta, Christian/0000-0001-6160-4279	National Natural Science Foundation of China [41907252]	National Natural Science Foundation of China(National Natural Science Foundation of China (NSFC))	FundingThe research was funded by the National Natural Science Foundation of China, grant number 41907252.		76	2	2	5	26	MDPI	BASEL	ST ALBAN-ANLAGE 66, CH-4052 BASEL, SWITZERLAND		2073-4441		WATER-SUI	Water	OCT	2021	13	19
J	Xiong, WW; Li, J; Wang, HK; Wu, YB; Li, DC; Xue, JH				Xiong, Weiwei; Li, Juan; Wang, Hankun; Wu, Yongbo; Li, Dongchang; Xue, Jianhui			Biochar Addition and the Runoff Quality of Newly Constructed Green Roofs: A Field Study	SUSTAINABILITY			English	Article						biochar; green roof; runoff quality; nutrient leaching	WATER QUANTITY; ORGANIC-CARBON; SOIL; PERFORMANCE; CONTAMINANTS; PHOSPHORUS; MANAGEMENT; POLLUTION; BENEFITS; NITROGEN	Extensive nutrient leaching has been a major concern in the establishing stage of green roofs. Although an addition of biochar to the green roof substrates has been increasingly recommended, the extent to which this addition can affect the runoff quality is still largely unknown. Using biochars made from maize straws (MSB) and rice husks (RHB), this study investigated the effects of biochar addit…	[Xiong, Weiwei; Li, Juan; Wang, Hankun; Wu, Yongbo; Li, Dongchang; Xue, Jianhui] Nanjing Forestry Univ, Coll Biol & Environm, Nanjing 210037, Peoples R China; [Xiong, Weiwei; Li, Juan; Wang, Hankun; Wu, Yongbo; Li, Dongchang; Xue, Jianhui] Nanjing Forestry Univ, Coinnovat Ctr Sustainable Forestry Southern China, Nanjing 210037, Peoples R China; [Xue, Jianhui] Jiangsu Prov & Chinese Acad Sci, Inst…	Nanjing Forestry University; Nanjing Forestry University	Xue, JH (corresponding author), Nanjing Forestry Univ, Coll Biol & Environm, Nanjing 210037, Peoples R China.;Xue, JH (corresponding author), Nanjing Forestry Univ, Coinnovat Ctr Sustainable Forestry Southern China, Nanjing 210037, Peoples R China.;Xue, JH (corresponding author), Jiangsu Prov & Chinese Acad Sci, Inst Bot, Nanjing 210014, Peoples R China.	jhxue@njfu.edu.cn	李, 東暢/AAA-4477-2021		Major State Basic Research Development Program of China [2016YFC0502605]; Forestry Science and Technology Innovation and Extension Program of Jiangsu Province [LYKJ(2022)02]; Priority Academic Program Development of Jiangsu Higher Education Institutions [PAPD]	Major State Basic Research Development Program of China(National Basic Research Program of China); Forestry Science and Technology Innovation and Extension Program of Jiangsu Province; Priority Academic Program Development of Jiangsu Higher Education Institutions	This research was supported by Major State Basic Research Development Program of China (grant no. 2016YFC0502605) and Forestry Science and Technology Innovation and Extension Program of Jiangsu Province (grant no. LYKJ(2022)02), and it was a project funded by Priority Academic Program Development of Jiangsu Higher Education Institutions (grant no. PAPD).		58	0	0	15	15	MDPI	BASEL	ST ALBAN-ANLAGE 66, CH-4052 BASEL, SWITZERLAND		2071-1050		SUSTAINABILITY-BASEL	Sustainability	MAR	2023	15	5
J	Xu, C; Liu, ZH; Cai, GJ; Zhan, J				Xu, Chen; Liu, Zaohong; Cai, Guanjun; Zhan, Jian			Nutrient leaching in extensive green roof substrate layers with different configurations	ENVIRONMENTAL SCIENCE AND POLLUTION RESEARCH			English	Article						Extensive green roof; Substrate layer; Nutrient leaching; Configuration; Rainfall runoff; Pollution interception	WATER-QUALITY; PLANT-GROWTH; PERFORMANCE; BIOCHAR; RUNOFF; RETENTION; AMENDMENT	Due to substrate layers with different substrate configurations, extensive green roofs (EGRs) exhibit different rainfall runoff retention and pollution interception effects. In the rainfall runoff scouring process, nutrient leaching often occurs in the substrate layer, which becomes a pollution source for rainwater runoff. In this study, six EGR devices with different substrate layer configuratio…	[Xu, Chen; Liu, Zaohong; Cai, Guanjun] Nanchang Univ, Sch Civil Engn & Architecture, Nanchang 330031, Jiangxi, Peoples R China; [Zhan, Jian] Nanchang Univ, Sch Resources Environm & Chem Engn, Minist Educ, Nanchang 330031, Jiangxi, Peoples R China; [Zhan, Jian] Nanchang Univ, Key Lab Poyang Lake Environm & Resource Utilizat, Minist Educ, Nanchang 330031, Jiangxi, Peoples R China	Nanchang University; Nanchang University; Nanchang University	Zhan, J (corresponding author), Nanchang Univ, Sch Resources Environm & Chem Engn, Minist Educ, Nanchang 330031, Jiangxi, Peoples R China.;Zhan, J (corresponding author), Nanchang Univ, Key Lab Poyang Lake Environm & Resource Utilizat, Minist Educ, Nanchang 330031, Jiangxi, Peoples R China.	zhanjian@ncu.edu.cn			Special Fund for Postgraduate Innovation in Jiangxi Province, China [YC2020-S125]; Postgraduate Innovation Project of Nanchang University, China [CX2019115]	Special Fund for Postgraduate Innovation in Jiangxi Province, China; Postgraduate Innovation Project of Nanchang University, China	This work was supported by the Special Fund for Postgraduate Innovation in Jiangxi Province, China (Grant No. YC2020-S125), and the Postgraduate Innovation Project of Nanchang University, China (Grant No. CX2019115).		38	1	1	10	31	SPRINGER HEIDELBERG	HEIDELBERG	TIERGARTENSTRASSE 17, D-69121 HEIDELBERG, GERMANY	0944-1344	1614-7499		ENVIRON SCI POLLUT R	Environ. Sci. Pollut. Res.	MAY	2022	29	23
J	Aman, AMN; Selvarajoo, A; Lau, TL; Chen, WH				Aman, Aan Mohammad Nusrat; Selvarajoo, Anurita; Lau, Teck Leong; Chen, Wei-Hsin			Biochar as Cement Replacement to Enhance Concrete Composite Properties: A Review	ENERGIES			English	Review						cement; supplementary cementitious materials; biochar; biochar concrete composites; economical; carbon sequestering	LIFE-CYCLE ASSESSMENT; BIOMASS; WASTE; YIELDS	In recent years, concrete has been accessible and economical in the construction industry, resulting in high demand for its components. Cement is known for its negative impact on the environment, which has led researchers to investigate alternative supplementary materials. Recently, biochar has been proposed as a replacement to cement in small amounts, with an optimum amount of 0.08-5, resulting …	[Aman, Aan Mohammad Nusrat; Selvarajoo, Anurita; Lau, Teck Leong] Univ Nottingham Malaysia, Dept Civil Engn, Jalan Broga, Semenyih 43500, Selangor, Malaysia; [Chen, Wei-Hsin] Natl Cheng Kung Univ, Dept Aeronaut & Astronaut, Tainan 701, Taiwan; [Chen, Wei-Hsin] Tunghai Univ, Res Ctr Smart Sustainable Circular Econ, Taichung 407, Taiwan; [Chen, Wei-Hsin] Natl Chin Yi Univ Technol, Dept Mech Engn, T…	University of Nottingham Malaysia; National Cheng Kung University; Tunghai University; National Chin-Yi University of Technology	Selvarajoo, A (corresponding author), Univ Nottingham Malaysia, Dept Civil Engn, Jalan Broga, Semenyih 43500, Selangor, Malaysia.	anurita.selvarajoo@nottingham.edu.my	Chen, Wei-Hsin/S-2033-2018	Chen, Wei-Hsin/0000-0001-5009-3960	Ministry of Science and Technology, Taiwan, ROC [MOST 109-2221-E-006-040-MY3, MOST 110-3116-F-006-003, MOST 110-2622-E-006-001-CC1]; Higher Education Sprout Project, Ministry of Education; Ministry of Higher Education (MOHE) [FRGS/1/2019/TK01/UNIM/02/1]; University of Nottingham (Malaysia Campus)	Ministry of Science and Technology, Taiwan, ROC(Ministry of Science and Technology, Taiwan); Higher Education Sprout Project, Ministry of Education; Ministry of Higher Education (MOHE)(Ministry of Higher Education & Scientific Research (MHESR)); University of Nottingham (Malaysia Campus)	The authors acknowledge the financial support of the Ministry of Science and Technology, Taiwan, ROC, under contracts MOST 109-2221-E-006-040-MY3, MOST 110-3116-F-006-003-and MOST 110-2622-E-006-001-CC1. This research was also supported in part by funding from the Higher Education Sprout Project, Ministry of Education to the Headquarters of University Advancement at National Chen Kung University …		62	1	1	19	25	MDPI	BASEL	ST ALBAN-ANLAGE 66, CH-4052 BASEL, SWITZERLAND		1996-1073		ENERGIES	Energies	OCT	2022	15	20
J	Liao, WX; Drake, J; Thomas, SC				Liao, Wenxi; Drake, Jennifer; Thomas, Sean C.			Biochar granulation enhances plant performance on a green roof substrate	SCIENCE OF THE TOTAL ENVIRONMENT			English	Article						Bulk density; Charcoal; Green infrastructure; Particle size; pH; Water retention	SOIL-WATER RETENTION; PARTICLE-SIZE; CHLOROPHYLL FLUORESCENCE; HYDRAULIC CONDUCTIVITY; NUTRIENT AVAILABILITY; ORGANIC-COMPOUNDS; AGGREGATE-SIZE; QUALITY; SANDY; BENEFITS	Green roofs have been widely promoted as a means to enhance ecosystem services in cities, but roofs present a harsh growing environment for plants. Biochar is suggested to be a highly beneficial substrate additive for green roof systems due to its low weight, high nutrient and water retention capacity, and recalcitrance. However, biochar is susceptible to wind and water erosion, which may result …	[Liao, Wenxi; Thomas, Sean C.] Univ Toronto, John H Daniels Fac Architecture Landscape & Desig, Inst Forestry & Conservat, 33 Willcocks St, Toronto, ON M5S 3B3, Canada; [Drake, Jennifer] Univ Toronto, Dept Civil & Mineral Engn, 35 St George St, Toronto, ON M5S 1A4, Canada	University of Toronto; University of Toronto	Liao, WX (corresponding author), Univ Toronto, John H Daniels Fac Architecture Landscape & Desig, Inst Forestry & Conservat, 33 Willcocks St, Toronto, ON M5S 3B3, Canada.	wenxi.liao@mail.utoronto.ca	Liao, Wenxi/HYB-9872-2023	Liao, Wenxi/0000-0001-6600-4395	Natural Sciences and Engineering Research Council of Canada (NSERC) Collaborative Research and Training Experience Program (CREATE); NSERC	Natural Sciences and Engineering Research Council of Canada (NSERC) Collaborative Research and Training Experience Program (CREATE)(Natural Sciences and Engineering Research Council of Canada (NSERC)); NSERC(Natural Sciences and Engineering Research Council of Canada (NSERC))	We thankMelanie Sifton and Emily Lock for assistancewith experiment setup andmaintenance, and Titan Clean Energy Projects Co., Gro-Bark Inc., and Bioroof Systems Inc. for the provision of materials used in the experiment and relevant production information. We are grateful toOtavio Titton Dias and Mohini Sain for help with biochar hydrophobicity tests. This research was funded by Natural Sciences…		97	7	8	14	60	ELSEVIER	AMSTERDAM	RADARWEG 29, 1043 NX AMSTERDAM, NETHERLANDS	0048-9697	1879-1026		SCI TOTAL ENVIRON	Sci. Total Environ.	MAR 20	2022	813
J	Racek, J; Chorazy, T; Komendova, R; Kucerik, J; Hlavinek, P				Racek, Jakub; Chorazy, Tomas; Komendova, Renata; Kucerik, Jiri; Hlavinek, Petr			Characteristics of a solid carbonaceous product of microwave pyrolysis/torrefaction of sewage sludge for the use in agriculture and blue-green infrastructure	DESALINATION AND WATER TREATMENT			English	Article						Sewage sludge management; Blue-green infrastructure; Microwave pyrolysis/torrefaction; Solid carbonaceous product; Biochar	WASTE-WATER; PYROLYSIS; BIOCHAR; TORREFACTION; REMOVAL; FATE	The aim of this work is to present results of preparation and characterization of the dried municipal sewage sludge and so called solid carbonaceous product, the outcome of its further processing by slow microwave pyrolysis/torrefaction. Characterization intends to determine the use of these products for combustion with energy production, agriculture, and blue-green infrastructure. The tests incl…	[Racek, Jakub; Chorazy, Tomas; Hlavinek, Petr] Brno Univ Technol, AdMaS Res Ctr, Fac Civil Engn, Purkynova 651-139, Brno 61200, Czech Republic; [Komendova, Renata; Kucerik, Jiri] Brno Univ Technol, Inst Chem & Technol Environm Protect, Fac Chem, Purkynova 464-118, Brno 61200, Czech Republic	Brno University of Technology; Brno University of Technology	Racek, J (corresponding author), Brno Univ Technol, AdMaS Res Ctr, Fac Civil Engn, Purkynova 651-139, Brno 61200, Czech Republic.	racek.j@fce.vutbr.cz; chorazy.t@fce.vutbr.cz; komendova@fch.vut.cz; kucerik@fch.vut.cz; hlavinek.p@fce.vutbr.cz	Raček, Jakub/AAI-1370-2020; Chorazy, Tomáš/HPC-6399-2023		TA CR [TJ02000261]; Ministry of Education, Youth and Sports of the Czech Republic [FCH-S-21-7398]	TA CR; Ministry of Education, Youth and Sports of the Czech Republic(Ministry of Education, Youth & Sports - Czech Republic)	This paper has been developed with the financial support of TA CR in the project No. TJ02000261 Torrefaction for the treatment of sewage sludge for further use. J. Kucerik and R. Komendova acknowledge the financial support of the FCH-S-21-7398 project of the Ministry of Education, Youth and Sports of the Czech Republic.		44	1	1	2	6	DESALINATION PUBL	HOPKINTON	36 WALCOTT VALLEY DRIVE,, HOPKINTON, MA 01748 USA	1944-3994	1944-3986		DESALIN WATER TREAT	Desalin. Water Treat.	MAY	2022	258
J	Abhinaya, M; Parthiban, R; Sivakumar, N				Abhinaya, M.; Parthiban, R.; Sivakumar, N.			Effects of using palm flower biochar in mechanical and water purification properties of pervious concrete	BIOMASS CONVERSION AND BIOREFINERY			English	Article; Early Access						Palm-flower biochar; Pervious concrete; Waste treatment; Stormwater management; Mechanical strength	CEMENT	Pervious concrete denotes an ecofriendly concrete with enhanced porosity that has the ability to reduce surface run-off parallelly enhancing ground water quantity and quality. Biochar on the other hand serves as an effective replacement for cement in pervious concrete improving its various properties. This study involves using biochar sourced from palm flower as partial cement replacement in perv…	[Abhinaya, M.; Parthiban, R.] Sri Sivasubramaniya Nadar Coll Engn, Dept Chem Engn, Chennai 603110, India; [Sivakumar, N.] Sri Sivasubramaniya Nadar Coll Engn, Dept Civil Engn, Chennai 603110, India	SSN College of Engineering; SSN College of Engineering	Parthiban, R (corresponding author), Sri Sivasubramaniya Nadar Coll Engn, Dept Chem Engn, Chennai 603110, India.	rparthi@gmail.com							48	0	0	5	13	SPRINGER HEIDELBERG	HEIDELBERG	TIERGARTENSTRASSE 17, D-69121 HEIDELBERG, GERMANY	2190-6815	2190-6823		BIOMASS CONVERS BIOR	Biomass Convers. Biorefinery	2022 DEC 7	2022
J	Harada, Y; Whitlow, TH; Bassuk, NL; Russell-Anelli, J				Harada, Yoshiki; Whitlow, Thomas H.; Bassuk, Nina L.; Russell-Anelli, Jonathan			Rooftop Farm Soils for Sustainable Water and Nitrogen Management	FRONTIERS IN SUSTAINABLE FOOD SYSTEMS			English	Article						urban agriculture (UA); rooftop agriculture; soilless media; stormwater management (SWM); green roof; green infrastructure (GI); urban ecology; ecosystem services (ES)	COCONUT COIR DUSTS; URBAN AGRICULTURE; PHYSICAL-PROPERTIES; BUSINESS MODELS; FOOD-PRODUCTION; SUBSTRATE; METROPOLIS; HYDROLOGY; CAPACITY; COMPOST	Rooftop farming intends to diversify options for enhancing sustainability of cities. From a policy perspective, vegetable production and stormwater management are among important goals of rooftop farming for bolstering public funding and policy support. However, crops with high value and market demand like salad greens often have high irrigation requirements, which risks increasing drainage outpu…	[Harada, Yoshiki; Whitlow, Thomas H.; Bassuk, Nina L.] Cornell Univ, Urban Hort Inst, Coll Agr & Life Sci, Hort Sect,Sch Integrat Plant Sci, Ithaca, NY 14850 USA; [Russell-Anelli, Jonathan] Cornell Univ, Coll Agr & Life Sci, Sch Integrat Plant Sci, Soil & Crop Sci Sect, Ithaca, NY 14853 USA	Cornell University; Cornell University	Harada, Y (corresponding author), Cornell Univ, Urban Hort Inst, Coll Agr & Life Sci, Hort Sect,Sch Integrat Plant Sci, Ithaca, NY 14850 USA.	yh535@cornell.edu	Bassuk, Nina/AAY-3163-2021		United States Department of Agriculture (USDA) Hatch Grant [1001972]; Sustainable Agriculture Research and Education (SARE) Partnership Grant Projects [ONE16-276]; Toward Sustainability Foundation; Japan Society for the Promotion of Science (JSPS) KAKENHI [JP20K15549]	United States Department of Agriculture (USDA) Hatch Grant; Sustainable Agriculture Research and Education (SARE) Partnership Grant Projects; Toward Sustainability Foundation; Japan Society for the Promotion of Science (JSPS) KAKENHI(Ministry of Education, Culture, Sports, Science and Technology, Japan (MEXT)Japan Society for the Promotion of ScienceGrants-in-Aid for Scientific Research (KAKENHI))	This study was based on the United States Department of Agriculture (USDA) Hatch Grant (1001972), Sustainable Agriculture Research and Education (SARE) Partnership Grant Projects (ONE16-276), and the Toward Sustainability Foundation, and the Japan Society for the Promotion of Science (JSPS) KAKENHI Grant Number JP20K15549.		51	3	3	3	32	FRONTIERS MEDIA SA	LAUSANNE	AVENUE DU TRIBUNAL FEDERAL 34, LAUSANNE, CH-1015, SWITZERLAND		2571-581X		FRONT SUSTAIN FOOD S	Front. Sustain. Food Syst.	AUG 20	2020	4
J	Lata, JC; Dusza, Y; Abbadie, L; Barot, S; Carmignac, D; Gendreau, E; Kraepiel, Y; Meriguet, J; Motard, E; Raynaud, X				Lata, J-C.; Dusza, Y.; Abbadie, L.; Barot, S.; Carmignac, D.; Gendreau, E.; Kraepiel, Y.; Meriguet, J.; Motard, E.; Raynaud, X.			Role of substrate properties in the provision of multifunctional green roof ecosystem services	APPLIED SOIL ECOLOGY			English	Article						Ecosystem services; Green roof substrate; Trade-offs; Urban ecology	CRASSULACEAN ACID METABOLISM; SOIL MICROBIAL COMMUNITIES; PLANT-GROWTH; WATER-RETENTION; GROWING MEDIA; DEPTH; PERFORMANCE; BIOCHAR; COMPONENTS; DIVERSITY	Urban ecosystems are increasingly recognized as key providers of ecosystem services. Among them, green roofs are particularly fashionable, and are in high demand by citizens, politicians, urban planners and architects. Surprisingly, the functioning of green roofs and the impact of substrate type have been so far poorly studied and impede to optimize a green roof and its substrate to provide targe…	[Lata, J-C.; Dusza, Y.; Abbadie, L.; Barot, S.; Carmignac, D.; Gendreau, E.; Kraepiel, Y.; Meriguet, J.; Motard, E.; Raynaud, X.] Univ Paris Diderot Paris 07, UPMC Univ Paris 06, Inst Ecol & Environm Sci Paris, Sorbonne Univ,IRD,CNRS,INRA,UPEC,UMR 7618, Tour 44-45,4 Pl Jussieu, F-75005 Paris, France; [Lata, J-C.] Tomsk Polytech Univ, Inst Nat Resources, Dept Geoecol & Geochem, 30 Lenin St, Tomsk …	Centre National de la Recherche Scientifique (CNRS); CNRS - Institute of Ecology & Environment (INEE); INRAE; UDICE-French Research Universities; Sorbonne Universite; AgroParisTech; Institut de Recherche pour le Developpement (IRD); Universite Paris Cite; Universite Paris-Est-Creteil-Val-de-Marne (UPEC); Tomsk Polytechnic University	Lata, JC (corresponding author), Univ Paris Diderot Paris 07, UPMC Univ Paris 06, Inst Ecol & Environm Sci Paris, Sorbonne Univ,IRD,CNRS,INRA,UPEC,UMR 7618, Tour 44-45,4 Pl Jussieu, F-75005 Paris, France.	jean-christophe.lata@upmc.fr	Raynaud, Xavier/C-2381-2009; Kraepiel, Yvan/D-5056-2017; barot, sébastien/A-8447-2012	Raynaud, Xavier/0000-0002-9065-2867; Kraepiel, Yvan/0000-0003-4043-5896; barot, sébastien/0000-0002-5910-538X	Mission Economie de la Biodiversite of CDC-Biodiversite (Caisse des Depots group); City of Paris	Mission Economie de la Biodiversite of CDC-Biodiversite (Caisse des Depots group); City of Paris(Region Ile-de-France)	We would like to thank the Mission Economie de la Biodiversite of CDC-Biodiversite (Caisse des Depots group) and the City of Paris for funding. We would also like to thank an anonymous referee for his constructive comments on an earlier draft.		51	18	19	8	71	ELSEVIER SCIENCE BV	AMSTERDAM	PO BOX 211, 1000 AE AMSTERDAM, NETHERLANDS	0929-1393	1873-0272		APPL SOIL ECOL	Appl. Soil Ecol.	FEB	2018	123
J	Spahr, S; Teixido, M; Sedlak, DL; Luthy, RG				Spahr, Stephanie; Teixido, Marc; Sedlak, David L.; Luthy, Richard G.			Hydrophilic trace organic contaminants in urban stormwater: occurrence, toxicological relevance, and the need to enhance green stormwater infrastructure	ENVIRONMENTAL SCIENCE-WATER RESEARCH & TECHNOLOGY			English	Review							WASTE-WATER TREATMENT; PERSONAL CARE PRODUCTS; POLYCYCLIC AROMATIC-HYDROCARBONS; COMBINED SEWER OVERFLOW; ENDOCRINE DISRUPTING CHEMICALS; ACTIVATED SOIL FILTERS; AQUATIC ENVIRONMENT; EMERGING CONCERN; DRINKING-WATER; IN-SITU	Hydrophilic trace organic contaminants (hyphil-TrOCs) are polar, often ionizable organic compounds of anthropogenic origin that have various applications in the urban environment e.g., as pesticides, plasticizers, and flame retardants. Hyphil-TrOCs can be washed off in storm events and enter surface waters via untreated urban stormwater discharges or combined sewer overflows. Though trace concent…	[Spahr, Stephanie; Luthy, Richard G.] Stanford Univ, Dept Civil & Environm Engn, Stanford, CA 94305 USA; [Spahr, Stephanie; Teixido, Marc; Sedlak, David L.; Luthy, Richard G.] NSF Engn Res Ctr Re Inventing Nat Urban Water Inf, Alexandria, VA 22314 USA; [Teixido, Marc; Sedlak, David L.] Univ Calif Berkeley, Dept Civil & Environm Engn, Berkeley, CA 94720 USA; [Spahr, Stephanie] Univ Tubingen, Ctr A…	Stanford University; University of California System; University of California Berkeley; Eberhard Karls University of Tubingen	Spahr, S; Luthy, RG (corresponding author), Stanford Univ, Dept Civil & Environm Engn, Stanford, CA 94305 USA.;Spahr, S; Luthy, RG (corresponding author), NSF Engn Res Ctr Re Inventing Nat Urban Water Inf, Alexandria, VA 22314 USA.;Spahr, S (corresponding author), Univ Tubingen, Ctr Appl Geosci, Tubingen, Germany.	stephanie.spahr@alumni.epfl.ch; luthyp@stanford.edu	Spahr, Stephanie/AAF-1490-2019	Spahr, Stephanie/0000-0002-3004-3162; Teixido Planes, Marc/0000-0002-1225-8047; Luthy, Richard/0000-0003-0274-0240	National Science Foundation Engineering Research Center: Re-inventing the Nation's Urban Water Infrastructure [NSF ERC ReNUWIt 1028968]; US Department of Defense Strategic Environmental Research and Development Program [ER18-1145]	National Science Foundation Engineering Research Center: Re-inventing the Nation's Urban Water Infrastructure; US Department of Defense Strategic Environmental Research and Development Program(United States Department of Defense)	This work was supported by the National Science Foundation Engineering Research Center: Re-inventing the Nation's Urban Water Infrastructure (NSF ERC ReNUWIt 1028968) and the US Department of Defense Strategic Environmental Research and Development Program, project ER18-1145.		221	59	61	8	125	ROYAL SOC CHEMISTRY	CAMBRIDGE	THOMAS GRAHAM HOUSE, SCIENCE PARK, MILTON RD, CAMBRIDGE CB4 0WF, CAMBS, ENGLAND	2053-1400	2053-1419		ENVIRON SCI-WAT RES	Environ. Sci.-Wat. Res. Technol.	JAN 1	2020	6	1
J	Mohanty, SK; Valenca, R; Berger, AW; Yu, IKM; Xiong, XN; Saunders, TM; Tsang, DCW				Mohanty, Sanjay K.; Valenca, Renan; Berger, Alexander W.; Yu, Iris K. M.; Xiong, Xinni; Saunders, Trenton M.; Tsang, Daniel C. W.			Plenty of room for carbon on the ground: Potential applications of biochar for stormwater treatment	SCIENCE OF THE TOTAL ENVIRONMENT			English	Review						Urban water; Water resilience; Engineered biochar; Sustainable drainage system; Green infrastructure; Stormwater pollutants	POLYCYCLIC AROMATIC-HYDROCARBONS; IMPROVED CONTAMINANT REMOVAL; ESCHERICHIA-COLI REMOVAL; RUNOFF WATER QUANTITY; ACTIVATED CARBON; PYROLYSIS TEMPERATURE; AQUEOUS-SOLUTION; HEAVY-METALS; HYDRAULIC CONDUCTIVITY; ADSORPTION CAPACITY	Low impact development (LID) systems are increasingly used to manage stormwater, but they have limited capacity to treat stormwater a resource to supplement existing water supply in water-stressed urban areas. To enhance their pollutant removal capacity, infiltration-based LID systems can be augmented with natural or engineered geomedia that meet the following criteria: they should be economical,…	[Mohanty, Sanjay K.; Valenca, Renan; Berger, Alexander W.; Saunders, Trenton M.] Univ Calif Los Angeles, Dept Civil & Environm Engn, 420 Westwood Plaza,5732-C Boelter Hall, Los Angeles, CA 90095 USA; [Yu, Iris K. M.; Xiong, Xinni; Tsang, Daniel C. W.] Hong Kong Polytech Univ, Dept Civil & Environm Engn, Kowloon, Hong Kong, Peoples R China	University of California System; University of California Los Angeles; Hong Kong Polytechnic University	Mohanty, SK (corresponding author), Univ Calif Los Angeles, Dept Civil & Environm Engn, 420 Westwood Plaza,5732-C Boelter Hall, Los Angeles, CA 90095 USA.;Tsang, DCW (corresponding author), Hong Kong Polytech Univ, Dept Civil & Environm Engn, Kowloon, Hong Kong, Peoples R China.	mohanty@ucla.edu; dan.tsang@polyu.edu.hk	Tsang, Dan/E-5442-2012; Mohanty, Sanjay K/H-9304-2013; Yu, Iris KM/Y-7434-2019; Valenca, Renan/AAQ-1168-2020	Tsang, Dan/0000-0002-6850-733X; Mohanty, Sanjay K/0000-0002-2142-5572; Yu, Iris KM/0000-0003-2494-8974; Valenca, Renan/0000-0001-8051-4076	University of California Los Angeles Henry Samueli School of Engineering and Applied Science; Hong Kong Research Grants Council [PolyU 538613, 15222115]	University of California Los Angeles Henry Samueli School of Engineering and Applied Science; Hong Kong Research Grants Council(Hong Kong Research Grants Council)	The work is supported by the Start-up fund from University of California Los Angeles Henry Samueli School of Engineering and Applied Science, and the Hong Kong Research Grants Council (PolyU 538613 and 15222115).		155	129	135	11	268	ELSEVIER	AMSTERDAM	RADARWEG 29, 1043 NX AMSTERDAM, NETHERLANDS	0048-9697	1879-1026		SCI TOTAL ENVIRON	Sci. Total Environ.	JUN 1	2018	625
J	Biswal, BK; Vijayaraghavan, K; Tsen-Tieng, DL; Balasubramanian, R				Biswal, Basanta Kumar; Vijayaraghavan, Kuppusamy; Tsen-Tieng, Daryl Lee; Balasubramanian, Rajasekhar			Biochar-based bioretention systems for removal of chemical and microbial pollutants from stormwater: A critical review	JOURNAL OF HAZARDOUS MATERIALS			English	Review						Biochar-based biofilter; Stormwater; Sorption; Chemical and microbial pollutants; Removal mechanisms	POLYCHLORINATED-BIPHENYLS PCBS; IMPROVED CONTAMINANT REMOVAL; ACTIVATED CARBON; ORGANIC-CARBON; HEAVY-METALS; MAGNETIC BIOCHAR; NITROGEN REMOVAL; AQUEOUS-SOLUTION; LOW-COST; WATER	Biochar has been increasingly used as a filter medium in engineered low impact development systems (e.g., bioretention systems) for decontamination of urban stormwater and management of hydrology. This review paper critically analyzes the performance of biochar-based biofiltration systems for removal of chemical and microbial pollutants present in urban runoff. Biochar-amended biofiltration syste…	[Biswal, Basanta Kumar; Vijayaraghavan, Kuppusamy; Balasubramanian, Rajasekhar] Natl Univ Singapore, Dept Civil & Environm Engn, Singapore 117576, Singapore; [Tsen-Tieng, Daryl Lee] Ctr Urban Greenery & Ecol, Natl Parks Board, 1 Cluny Rd, Singapore 259563, Singapore	National University of Singapore	Balasubramanian, R (corresponding author), Natl Univ Singapore, Dept Civil & Environm Engn, Singapore 117576, Singapore.	ceerbala@nus.edu.sg	Biswal, Basanta Kumar/GRF-3638-2022	Biswal, Basanta Kumar/0000-0002-7051-2568	National Research Foundation, Singapore; Ministry of National Development, Singapore under its Cities of Tomorrow R&D Programme (CoT Award) [COT-V4-2019-6]	National Research Foundation, Singapore(National Research Foundation, Singapore); Ministry of National Development, Singapore under its Cities of Tomorrow R&D Programme (CoT Award)	This research/project is supported by the National Research Foundation, Singapore, and Ministry of National Development, Singapore under its Cities of Tomorrow R&D Programme (CoT Award COT-V4-2019-6) . Any opinions, findings and conclusions or recom-mendations expressed in this material are those of the author (s) and do not reflect the views of National Research Foundation, Singapore and Ministr…		145	36	37	17	176	ELSEVIER	AMSTERDAM	RADARWEG 29, 1043 NX AMSTERDAM, NETHERLANDS	0304-3894	1873-3336		J HAZARD MATER	J. Hazard. Mater.	JAN 15	2022	422
J	Hasan, MS; Vasquez, R; Geza, M				Hasan, Md Sazadul; Vasquez, Raul; Geza, Mengistu			Application of Biochar in Stormwater Treatment: Experimental and Modeling Investigation	PROCESSES			English	Article						heavy metals; stormwater treatment; biochar; HYDRUS modeling	HEAVY-METAL IONS; ZERO-VALENT IRON; ZEROVALENT IRON; HYDRAULIC CONDUCTIVITY; BIORETENTION SYSTEM; AQUEOUS-SOLUTIONS; ACTIVATED CARBON; ARSENIC REMOVAL; ADSORPTION; WATER	This research investigated the removal of heavy metal ions (Cd, Cu, Pb, and Zn) and metalloid (As) common to stormwater runoff onto biochar-based media arranged in multiple configurations. Laboratory scale column experiments were conducted to quantify heavy metal removal efficiencies using sand, biochar, and nZVI-modified biochar (BC-nZVI) in four media configurations: a homogeneous mixture of sa…	[Hasan, Md Sazadul; Geza, Mengistu] South Dakota Sch Mines & Technol, Civil & Environm Engn, Rapid City, SD 57701 USA; [Vasquez, Raul] South Dakota Dept Environm & Nat Resources, Rapid City, SD 57701 USA	South Dakota School Mines & Technology	Geza, M (corresponding author), South Dakota Sch Mines & Technol, Civil & Environm Engn, Rapid City, SD 57701 USA.	mdsazadul.hasan@mines.sdsmt.edu; raul.vasquez@state.sd.us; stu.geza@sdsmt.edu		HASAN, MD SAZADUL/0000-0002-2317-9731; Geza, Mengistu/0000-0001-6913-8575	Nelson Foundation; Water Resources Foundation; Civil and Environmental Engineering Department, South Dakota School of Mines and Technology	Nelson Foundation; Water Resources Foundation; Civil and Environmental Engineering Department, South Dakota School of Mines and Technology	This research was funded by Nelson Foundation Grant, Water Resources Foundation, and Civil and Environmental Engineering Department, South Dakota School of Mines and Technology.		57	6	6	3	34	MDPI	BASEL	ST ALBAN-ANLAGE 66, CH-4052 BASEL, SWITZERLAND		2227-9717		PROCESSES	Processes	MAY	2021	9	5
J	Yaphary, YL; He, MJ; Lu, GY; Zou, FL; Liu, PF; Tsang, DCW; Leng, Z				Yaphary, Yohannes L.; He, Mingjing; Lu, Guoyang; Zou, Fuliao; Liu, Pengfei; Tsang, Daniel C. W.; Leng, Zhen			Experiment and multiscale molecular simulations on the Cu absorption by biochar-modified asphalt: An insight into removal capability and mechanism of heavy metals from stormwater runoff	CHEMICAL ENGINEERING JOURNAL			English	Article						Asphalt; Biochar; Metal removal; absorption; Stormwater quality; Runoff pollution; Surface water treatment	URBAN ROAD SURFACES; DYNAMICS; BUILDUP; DUST; FRACTIONATION; OXIDATION; PAVEMENT; DENSITY; ENERGY; SOILS	Asphalt has been the primary material for pavements and other building components such as roof shingles and waterproofing systems, which can be the path for stormwater runoff pollutants such as heavy metals (HMs). In this study, the capability and mechanism of asphalt and biochar-modified asphalt (BMA) to remove Cu as the typical HM found in the road dust and surface runoff were fundamentally exp…	[Yaphary, Yohannes L.; He, Mingjing; Zou, Fuliao; Tsang, Daniel C. W.; Leng, Zhen] Hong Kong Polytech Univ, Dept Civil & Environm Engn, Hong Kong, Peoples R China; [Lu, Guoyang] City Univ Hong Kong, Dept Architecture & Civil Engn, Tat Chee Ave, Hong Kong, Peoples R China; [Yaphary, Yohannes L.] Natl Univ Singapore, Dept Chem, 3 Sci Dr 3, Singapore 117543, Singapore; [Liu, Pengfei] Rhein Westfal T…	Hong Kong Polytechnic University; City University of Hong Kong; National University of Singapore; RWTH Aachen University	Leng, Z (corresponding author), Hong Kong Polytech Univ, Dept Civil & Environm Engn, Hong Kong, Peoples R China.;Lu, GY (corresponding author), City Univ Hong Kong, Dept Architecture & Civil Engn, Tat Chee Ave, Hong Kong, Peoples R China.	guoyanlu@cityu.edu.hk; zhen.leng@polyu.edu.hk	Tsang, Dan/E-5442-2012; leng, zhen/AFO-9989-2022	Tsang, Dan/0000-0002-6850-733X; leng, zhen/0000-0002-7797-1134; HE, Mingjing/0000-0001-5181-0765; Lu, Guoyang/0000-0001-9012-1751; Lim Yaphary, Yohannes/0000-0002-8114-7682	Germany/Hong Kong Joint Research Scheme; Germany/Hong Kong Joint Research Scheme - Research Grants Council of Hong Kong [G-505/21]; General Research Fund from Research Grants Concil of Hong Kong [15221921]; German Academic Exchange Service of Germany [57601840]	Germany/Hong Kong Joint Research Scheme; Germany/Hong Kong Joint Research Scheme - Research Grants Council of Hong Kong; General Research Fund from Research Grants Concil of Hong Kong; German Academic Exchange Service of Germany(Deutscher Akademischer Austausch Dienst (DAAD))	We would like to acknowledge this research work was supported by a grant from the Germany/Hong Kong Joint Research Scheme sponsored by the Research Grants Council of Hong Kong (Ref. no. G-505/21) , General Research Fund from Research Grants Concil of Hong Kong (Ref. no. 15221921) , and the German Academic Exchange Service of Germany (Grant no. 57601840) , and high performance computing facilities…		87	2	2	20	20	ELSEVIER SCIENCE SA	LAUSANNE	PO BOX 564, 1001 LAUSANNE, SWITZERLAND	1385-8947	1873-3212		CHEM ENG J	Chem. Eng. J.	APR 15	2023	462
J	Kader, SA; Spalevic, V; Dudic, B				Kader, Shuraik A. A.; Spalevic, Velibor; Dudic, Branislav			Feasibility study for estimating optimal substrate parameters for sustainable green roof in Sri Lanka	ENVIRONMENT DEVELOPMENT AND SUSTAINABILITY			English	Article; Early Access						Organic wastes; Green roof; Urban ecosystems; Sustainable substrate	ELECTRICAL-CONDUCTIVITY; PLANT-GROWTH; THERMAL-CONDUCTIVITY; BIOCHAR APPLICATION; ORGANIC WASTES; GROWING MEDIA; SOIL; MOISTURE; CULTIVATION; PERFORMANCE	In twenty-first century buildings, green roof systems are envisioned as great solution for improving Environmental sustainability in urban ecosystems and it helps to mitigate various health hazards for humans due to climatic pollution. This study determines the feasibility of using five domestic organic wastes, including sawdust, wood bark, biochar, coir, and compost, as sustainable substrates fo…	[Kader, Shuraik A. A.] Sri Lanka Inst Informat Technol, Fac Engn, Dept Civil Engn, Malabe 10115, Sri Lanka; [Spalevic, Velibor] Univ Montenegro, Biotech Fac, Podgorica 81000, Montenegro; [Dudic, Branislav] Comenius Univ, Fac Management, Bratislava 82005, Slovakia; [Dudic, Branislav] Univ Business Acad Novi Sad, Dept Engn Management Agribusiness, Novi Sad 21000, Serbia	Sri Lanka Institute of Information Technology (SLIIT); University of Montenegro; Comenius University Bratislava; University of Novi Sad	Dudic, B (corresponding author), Comenius Univ, Fac Management, Bratislava 82005, Slovakia.;Dudic, B (corresponding author), Univ Business Acad Novi Sad, Dept Engn Management Agribusiness, Novi Sad 21000, Serbia.	branislav.dudic@fm.uniba.sk	Spalevic, Velibor/AAS-9304-2020; Kader, Shuraik/GPK-7813-2022	Spalevic, Velibor/0000-0002-7800-2909; Kader, Shuraik/0000-0002-2907-5327; Dudic, Branislav/0000-0002-4647-6026					108	4	4	5	5	SPRINGER	DORDRECHT	VAN GODEWIJCKSTRAAT 30, 3311 GZ DORDRECHT, NETHERLANDS	1387-585X	1573-2975		ENVIRON DEV SUSTAIN	Environ. Dev. Sustain.	2022 DEC 21	2022
J	Deng, Y				Deng, Yang			Low-cost adsorbents for urban stormwater pollution control	FRONTIERS OF ENVIRONMENTAL SCIENCE & ENGINEERING			English	Review						Urban stormwater; Runoff pollutants; Low-cost adsorbents; Adsorption; Chemical leaching	POLYCYCLIC AROMATIC-HYDROCARBONS; WATER-TREATMENT RESIDUALS; ZERO-VALENT IRON; HEAVY-METALS; BIORETENTION AMENDMENT; ESCHERICHIA-COLI; BIOCHAR; REMOVAL; SORPTION; QUALITY	Stormwater represents a major non-point pollution source at an urban environment. To improve the treatment efficacy of stormwater infrastructure, low-cost adsorbents have increasingly gained attention over the past decades. This article aims to briefly discuss several key aspects and principles for utilization of low-cost adsorbents for urban stormwater treatment. To determine whether a low-cost …	[Deng, Yang] Montclair State Univ, Dept Earth & Environm Studies, Montclair, NJ 07043 USA	Montclair State University	Deng, Y (corresponding author), Montclair State Univ, Dept Earth & Environm Studies, Montclair, NJ 07043 USA.	dengy@mail.montclair.edu	Deng, Yang/G-7914-2018; Deng, Yang/HLG-9800-2023	Deng, Yang/0000-0002-2908-3044;	US Environmental Protection Agency [SU836773, SV839355]; EPA [909801, SU836773] Funding Source: Federal RePORTER	US Environmental Protection Agency(United States Environmental Protection Agency); EPA(United States Environmental Protection Agency)	We greatly appreciate the support from US Environmental Protection Agency (Grant Nos. SU836773 and SV839355).		61	24	24	13	74	HIGHER EDUCATION PRESS	BEIJING	CHAOYANG DIST, 4, HUIXINDONGJIE, FUSHENG BLDG, BEIJING 100029, PEOPLES R CHINA	2095-2201	2095-221X		FRONT ENV SCI ENG	Front. Env. Sci. Eng.	JUN 12	2020	14	5
J	Qin, YH; Pang, XJ; Tan, KH; Bao, T				Qin, Yinghong; Pang, Xijun; Tan, Kanghao; Bao, Ting			Evaluation of pervious concrete performance with pulverized biochar as cement replacement	CEMENT & CONCRETE COMPOSITES			English	Article						Biochar concrete; Absorption and evaporation; CO2 sequestration; Solar reflectance; Microstructure morphology		Manufacturing cement in the industry is responsible for most of carbon dioxide (CO2) emissions to the atmosphere, while producing biochar (BC) reduces CO2 emissions to the atmosphere. Replacing a portion of cement with BC will be a win-win alternative to curtail CO2 emissions and simultaneously lock up BC. However, the mechanical performance and properties of concrete with BC as a cement replacem…	[Qin, Yinghong; Pang, Xijun; Tan, Kanghao] Guangxi Univ, Coll Civil Engn & Architecture, 100 Univ Rd, Nanning 530004, Guangxi, Peoples R China; [Qin, Yinghong; Pang, Xijun; Tan, Kanghao] Minist Educ, Key Lab Disaster Prevent & Struct Safety, Nanning 530004, Guangxi, Peoples R China; [Bao, Ting] Michigan Technol Univ, Dept Civil & Environm Engn, 1400 Townsend Dr, Houghton, MI 49931 USA; [Bao, Ting…	Guangxi University; Michigan Technological University; United States Department of Energy (DOE); Pacific Northwest National Laboratory	Bao, T (corresponding author), Michigan Technol Univ, Dept Civil & Environm Engn, 1400 Townsend Dr, Houghton, MI 49931 USA.;Bao, T (corresponding author), Pacific Northwest Natl Lab, Richland, WA 99352 USA.	tbao@mtu.edu	Bao, Ting/ABF-3470-2021; kanghao, Tan/GNM-9884-2022	Bao, Ting/0000-0002-2065-7750;	High-Level Innovation Team and Outstanding Scholar Program in Guangxi Colleges; Science Foundation of Guangxi [2018GXNSFAA294070, 2018GXNSFDA138009]	High-Level Innovation Team and Outstanding Scholar Program in Guangxi Colleges; Science Foundation of Guangxi	This work is supported by the High-Level Innovation Team and Outstanding Scholar Program in Guangxi Colleges (granted to Dr. Yinghong Qin) and by the Science Foundation of Guangxi (Grant no. 2018GXNSFAA294070, no. 2018GXNSFDA138009).		39	36	36	6	43	ELSEVIER SCI LTD	OXFORD	THE BOULEVARD, LANGFORD LANE, KIDLINGTON, OXFORD OX5 1GB, OXON, ENGLAND	0958-9465	1873-393X		CEMENT CONCRETE COMP	Cem. Concr. Compos.	MAY	2021	119
J	Ghavanloughajar, M; Valenca, R; Le, H; Rahman, M; Borthakur, A; Ravi, S; Stenstrom, MK; Mohanty, SK				Ghavanloughajar, Maryam; Valenca, Renan; Le, Huong; Rahman, Merrick; Borthakur, Annesh; Ravi, Sujith; Stenstrom, Michael K.; Mohanty, Sanjay K.			Compaction conditions affect the capacity of biochar-amended sand fi lters to treat road runoff	SCIENCE OF THE TOTAL ENVIRONMENT			English	Article						Green infrastructure; Hydraulic conductivity; Biochar erosion; Matrix diffusion; Urban sustainability; Fecal indicator bacteria	ESCHERICHIA-COLI REMOVAL; POLLUTANT REMOVAL; SOIL COMPACTION; PARTICLE-SIZE; STORMWATER; FLOW; TRANSPORT; BACTERIA; RETENTION; IMPROVE	Amending roadside soil with adsorbents such as biochar can help remove pollutants from road runoff. To maintain soil stability, the roadside soil requires compaction. However, it is unknown how compaction conditions affect the capacity of biochar-augmented roadside biofilters to infiltrate stormwater and remove pollutants. This work examines the effect of compaction conditions on the release of b…	[Ghavanloughajar, Maryam; Valenca, Renan; Le, Huong; Rahman, Merrick; Borthakur, Annesh; Stenstrom, Michael K.; Mohanty, Sanjay K.] Univ Calif Los Angeles, Dept Civil & Environm Engn, Los Angeles, CA 90095 USA; [Ravi, Sujith] Temple Univ, Dept Earth & Environm Sci, Philadelphia, PA 19122 USA	University of California System; University of California Los Angeles; Pennsylvania Commonwealth System of Higher Education (PCSHE); Temple University	Mohanty, SK (corresponding author), Univ Calif Los Angeles, Dept Civil & Environm Engn, Los Angeles, CA 90095 USA.	mohanty@ucla.edu	Stenstrom, Michael K/A-3177-2008; Mohanty, Sanjay K/H-9304-2013; Valenca, Renan/AAQ-1168-2020; Borthakur, Annesh/S-8733-2018	Stenstrom, Michael K/0000-0001-6157-0718; Mohanty, Sanjay K/0000-0002-2142-5572; Ravi, Sujith/0000-0002-0425-9373; Borthakur, Annesh/0000-0002-9321-3683; Valenca, Renan/0000-0001-8051-4076	California Department of Transportation (Caltrans)	California Department of Transportation (Caltrans)	We acknowledge the generous contribution donation of biochar from Biochar Supreme Co (Everson, WA). The work is partially supported by the California Department of Transportation (Caltrans). The views expressed in this document are solely those of the authors and do not necessarily reflect those of the agency. The Caltrans does not endorse any products mentioned in this publication.		40	20	20	2	45	ELSEVIER	AMSTERDAM	RADARWEG 29, 1043 NX AMSTERDAM, NETHERLANDS	0048-9697	1879-1026		SCI TOTAL ENVIRON	Sci. Total Environ.	SEP 15	2020	735
J	Li, GR; Zhang, P; Chen, Q; Zhang, Z				Li, Guirong; Zhang, Peng; Chen, Qiang; Zhang, Zhi			A Preliminary Exploration of Different Planting Combinations of Extensive Green Roof in Warm Temperate Semi Humid Climate Zone	POLISH JOURNAL OF ENVIRONMENTAL STUDIES			English	Article						warm temperate semi humid region; extensive green roof; weight load bearing capacity; planting substrate; plant species	SUBSTRATE DEPTH; HYDROLOGIC PERFORMANCE; WATER; GROWTH; BIOCHAR; RUNOFF; REGION; MEDIA	The construction methods of extensive green roof are different in different regional climate conditions, which are directly affected by weight load bearing capacity, planting substrate, plant species and other factors. In order to explore the planting types of extensive green roof suitable for warm temperate semi humid region, 12 plant species and 5 planting substrates were selected to conduct th…	[Li, Guirong; Zhang, Peng; Chen, Qiang] Shandong Jianzhu Univ, Jinan, Shandong, Peoples R China; [Zhang, Zhi] Shandong Yicheng Ecol Technol Co Ltd, Jinan, Shandong, Peoples R China	Shandong Jianzhu University	Chen, Q (corresponding author), Shandong Jianzhu Univ, Jinan, Shandong, Peoples R China.	chdchysd@gmail.com			Shandong Natural Science Foundation Committee [2019GSF110001]; Department of Housing and Urban-Rural of Shandong Province, China [2018-K1-02]	Shandong Natural Science Foundation Committee; Department of Housing and Urban-Rural of Shandong Province, China	The authors would like to thank Shandong Natural Science Foundation Committee (No. 2019GSF110001) and the Department of Housing and Urban-Rural of Shandong Province (No. 2018-K1-02), China for their financial supports.		56	1	1	2	3	HARD	OLSZTYN 5	POST-OFFICE BOX, 10-718 OLSZTYN 5, POLAND	1230-1485	2083-5906		POL J ENVIRON STUD	Pol. J. Environ. Stud.		2022	31	5
J	Hasan, MS; Geza, M; Vasquez, R; Chilkoor, G; Gadhamshetty, V				Hasan, Md Sazadul; Geza, Mengistu; Vasquez, Raul; Chilkoor, Govinda; Gadhamshetty, Venkataramana			Enhanced Heavy Metal Removal from Synthetic Stormwater Using Nanoscale Zerovalent Iron-Modified Biochar	WATER AIR AND SOIL POLLUTION			English	Article						Heavy metal; Biochar; Stormwater treatment; Nanoscale zerovalent iron-modified biochar	ZERO-VALENT-IRON; CORE-SHELL STRUCTURE; ACTIVATED CARBON; WATER-TREATMENT; WASTE-WATER; RUNOFF; SORPTION; CR(VI); NANOPARTICLES; REMEDIATION	The use of biochar for removal of heavy metals from stormwater is limited due to large area requirements and inadequate removal of nutrients and heavy metals at higher initial concentrations. In this study, biochar-supported nanoscale zerovalent iron (BC-nZVI) was effectively utilized for removing heavy metals from synthetic stormwater. We performed batch adsorption and laboratory-scale column ex…	[Hasan, Md Sazadul; Geza, Mengistu; Chilkoor, Govinda] South Dakota Sch Mines & Technol, Dept Civil & Environm Engn, 501 E St Joseph St, Rapid City, SD 57701 USA; [Vasquez, Raul] South Dakota Dept Environm & Nat Resources, Joe Foss Bldg,523 East Capitol Ave, Pierre, SD 57501 USA; [Chilkoor, Govinda; Gadhamshetty, Venkataramana] South Dakota Sch Mines & Technol, Surface Engn Res Ctr, 501 E St Jose…	South Dakota School Mines & Technology; South Dakota School Mines & Technology	Geza, M (corresponding author), South Dakota Sch Mines & Technol, Dept Civil & Environm Engn, 501 E St Joseph St, Rapid City, SD 57701 USA.	mdsazadul.hasan@mines.sdsmt.edu; Stu.Geza@sdsmt.edu; Raul.vasquez@state.sd.us; govind.chilkoor@mines.sdsmt.edu; venkata.Gadhamshetty@sdsmt.edu	Gopala, Krishna Govinda Rajan Chilkoor Chilkoor/K-9499-2019		Nelson Foundation Grant; South Dakota School of Mines and Technology	Nelson Foundation Grant; South Dakota School of Mines and Technology	This work was supported by Nelson Foundation Grant and the South Dakota School of Mines and Technology. The authors would like to thank Mr. Forest Cooper for providing support in setting up some of the lab equipment related to this work. We would like to acknowledge with gratitude Ms. Sushma Priyanka Karanam for their help during the experiment.		54	28	29	15	87	SPRINGER INTERNATIONAL PUBLISHING AG	CHAM	GEWERBESTRASSE 11, CHAM, CH-6330, SWITZERLAND	0049-6979	1573-2932		WATER AIR SOIL POLL	Water Air Soil Pollut.	MAY 4	2020	231	5
J	Xiong, JQ; Ren, SH; He, YF; Wang, XCC; Bai, XC; Wang, JX; Dzakpasu, M				Xiong, Jiaqing; Ren, Sihui; He, Yifan; Wang, Xiaochang C.; Bai, Xuechen; Wang, Jiaxuan; Dzakpasu, Mawuli			Bioretention cell incorporating Fe-biochar and saturated zones for enhanced stormwater runoff treatment	CHEMOSPHERE			English	Article						Runoff pollution; Bioretention; Iron-modified biochar; Amended media; Nutrients	WATER-QUALITY IMPROVEMENT; NITROGEN REMOVAL; NUTRIENT REMOVAL; SOIL; PHOSPHORUS; DENITRIFICATION; NITRIFICATION; PERFORMANCE; BIOFILTERS; RETENTION	Nitrogen (N) and phosphorus (P) removal in conventional bioretention systems is highly variable. Therefore, five novel experimental columns with different media configurations and constituents, and incorporating a saturated zone were developed and assessed to optimize the removal of N, P and other nutrients. Three types of media composed of the conventional mixed sand and soil media (T-1), biocha…	[Xiong, Jiaqing; Wang, Xiaochang C.; Dzakpasu, Mawuli] Xian Univ Architecture & Technol, Key Lab Northwest Water Resource Environm & Ecol, MOE, Xian 710055, Shaanxi, Peoples R China; [Xiong, Jiaqing; Ren, Sihui; He, Yifan; Wang, Xiaochang C.; Dzakpasu, Mawuli] Xian Univ Architecture & Technol, Sch Environm & Municipal Engn, Yan Ta Rd 13, Xian 710055, Shaanxi, Peoples R China; [Bai, Xuechen] China…	Xi'an University of Architecture & Technology; Xi'an University of Architecture & Technology; Xi'an University of Science & Technology	Xiong, JQ (corresponding author), Xian Univ Architecture & Technol, Key Lab Northwest Water Resource Environm & Ecol, MOE, Xian 710055, Shaanxi, Peoples R China.	xiongjiaqing@xauat.edu.cn	Dzakpasu, Mawuli/D-2506-2011	Dzakpasu, Mawuli/0000-0001-6425-1034; Wang, Xiaochang/0000-0003-1320-6326	National Program of Water Pollution Control [2012ZX07308-001-08]; Program for Changjiang Scholars and Innovative Research Team in University [1RT0853]; Shaanxi Innovative Research Team Program for Key Science and Technology; Key Research and Development Program of Shaanxi Province [2018KWZ-11]; National Natural Science Foundation of China [51808442]; Natural Science Basic Research Plan of Shaanxi…	National Program of Water Pollution Control; Program for Changjiang Scholars and Innovative Research Team in University(Program for Changjiang Scholars & Innovative Research Team in University (PCSIRT)); Shaanxi Innovative Research Team Program for Key Science and Technology; Key Research and Development Program of Shaanxi Province; National Natural Science Foundation of China(National Natural Sc…	This work is supported by the National Program of Water Pollution Control (Grant No. 2012ZX07308-001-08), the Program for Changjiang Scholars and Innovative Research Team in University (Grant No. 1RT0853), the Shaanxi Innovative Research Team Program for Key Science and Technology, the Key Research and Development Program of Shaanxi Province (Grant No. 2018KWZ-11), the National Natural Science Fo…		43	48	53	8	157	PERGAMON-ELSEVIER SCIENCE LTD	OXFORD	THE BOULEVARD, LANGFORD LANE, KIDLINGTON, OXFORD OX5 1GB, ENGLAND	0045-6535	1879-1298		CHEMOSPHERE	Chemosphere	DEC	2019	237
J	Ray, JR; Shabtai, IA; Teixido, M; Mishael, YG; Sedlak, DL				Ray, Jessica R.; Shabtai, Itamar A.; Teixido, Marc; Mishael, Yael G.; Sedlak, David L.			Polymer-clay composite geomedia for sorptive removal of trace organic compounds and metals in urban stormwater	WATER RESEARCH			English	Article						Urban stormwater; Biochar; Sorption; Pesticide; PFAS	ACTIVATED CARBON; HUMIC-ACID; ADSORPTION; BIOCHAR; MATTER; WATER; SORBENTS; MONTMORILLONITE; CONTAMINANTS; GROUNDWATER	Functionalized polymer-clay composites were developed and characterized as engineered geomedia for trace contaminant removal during infiltration of urban runoff. Montmorillonite clays were functionalized with either poly(diallyldimethylammonium) chloride (PDADMAC) or poly(4-vinylpyridine-co-styrene) (PVPcoS) to enhance organic compound sorption using a simple, scalable synthesis method. Seven rep…	[Ray, Jessica R.; Teixido, Marc; Sedlak, David L.] Univ Calif Berkeley, Dept Civil & Environm Engn, NSF Engn Res Ctr Reinventing Nations Urban Water, Berkeley, CA 94720 USA; [Shabtai, Itamar A.; Mishael, Yael G.] Hebrew Univ Jerusalem, Robert Smith Fac Agr Food & Environm, Dept Soil & Water Sci, IL-7610001 Rehovot, Israel; [Ray, Jessica R.] Univ Washington, Dept Civil & Environm Engn, Seattle, WA…	University of California System; University of California Berkeley; Hebrew University of Jerusalem; University of Washington; University of Washington Seattle; Cornell University	Sedlak, DL (corresponding author), Univ Calif Berkeley, Dept Civil & Environm Engn, NSF Engn Res Ctr Reinventing Nations Urban Water, Berkeley, CA 94720 USA.	sedlak@berkeley.edu	Shabtai, Itamar A/K-1207-2019; Mishael, Yael/AAB-1826-2020	Shabtai, Itamar A/0000-0003-0593-0146; Teixido Planes, Marc/0000-0002-1225-8047	University of California, Berkeley Miller Institute for Basic Research Postdoctoral Fellowship; National Science Foundation (NSF) Engineering Research Center for Reinventing the Nation's Urban Water Infrastructure (ReNUWIt) [EEC-1028968]	University of California, Berkeley Miller Institute for Basic Research Postdoctoral Fellowship; National Science Foundation (NSF) Engineering Research Center for Reinventing the Nation's Urban Water Infrastructure (ReNUWIt)(National Science Foundation (NSF))	This research was supported by the University of California, Berkeley Miller Institute for Basic Research Postdoctoral Fellowship, and the National Science Foundation (NSF) Engineering Research Center for Reinventing the Nation's Urban Water Infrastructure (ReNUWIt) EEC-1028968.		64	47	47	16	231	PERGAMON-ELSEVIER SCIENCE LTD	OXFORD	THE BOULEVARD, LANGFORD LANE, KIDLINGTON, OXFORD OX5 1GB, ENGLAND	0043-1354			WATER RES	Water Res.	JUN 15	2019	157
C	Valagussa, M; Gatt, A; Tosca, A; Martinetti, L		Giuffrida, F; Zaccheo, P; Cattivello, C		Valagussa, M.; Gatt, A.; Tosca, A.; Martinetti, L.			Physical, chemical and hydraulic characterization of different green roof growing media	III INTERNATIONAL SYMPOSIUM ON GROWING MEDIA, COMPOSTING AND SUBSTRATE ANALYSIS	Acta Horticulturae		English	Proceedings Paper	3rd International Symposium on Growing Media, Composting and Substrate Analysis	JUN 24-28, 2019	Milan, ITALY	Int Soc Hort Sci		biochar; urban greening; storm water management; runoff; substrate	SUBSTRATE; BIOCHAR; GROWTH	Green roofs are widespread in northern Europe and in recent years they are receiving great attention also in Italy, due to their important benefits, including urban climate mitigation and rainfall retention. In the green roof technology the substrate plays a decisive role in guaranteeing performance of vegetation and storm water management, and the main regulations governing this topic (FLL-2008,…	[Valagussa, M.] Minoprio Anal & Certificaz Srl, Vertemate Con Minoprio, Italy; [Gatt, A.] Univ Malta, Fac Built Environm, Msida, Malta; [Tosca, A.] Fdn Minoprio, Vertemate Con Minoprio, Italy; [Martinetti, L.] Univ Milan, Dept Agr & Environm Sci, Milan, Italy	University of Malta; University of Milan	Martinetti, L (corresponding author), Univ Milan, Dept Agr & Environm Sci, Milan, Italy.	Livia.Martinetti@unimi.it	Tosca, Alberto/AAR-3043-2021	Tosca, Alberto/0000-0002-6775-7855	EU LIFE `LifeMedGreenRoof' project [LIFE12 ENV/MT/000732]	EU LIFE `LifeMedGreenRoof' project	This project was partially funded by the EU LIFE `LifeMedGreenRoof' project (LIFE12 ENV/MT/000732).		13	0	0	0	6	INT SOC HORTICULTURAL SCIENCE	LEUVEN 1	PO BOX 500, 3001 LEUVEN 1, BELGIUM	0567-7572	2406-6168	978-94-62613-03-4	ACTA HORTIC			2021	1305
J	Ashoori, N; Teixido, M; Spahr, S; LeFevre, GH; Sedlak, DL; Luthy, RG				Ashoori, Negin; Teixido, Marc; Spahr, Stephanie; LeFevre, Gregory H.; Sedlak, David L.; Luthy, Richard G.			Evaluation of pilot-scale biochar-amended woodchip bioreactors to remove nitrate, metals, and trace organic contaminants from urban stormwater runoff	WATER RESEARCH			English	Article						Stormwater treatment; Woodchip bioreactor; Biochar; Nitrate; Trace organic contaminants; Metals	HEAVY-METALS; ACTIVATED CARBON; WATER; DENITRIFICATION; SYSTEMS; BIODEGRADATION; ADSORPTION; RETENTION; BACTERIA; NITROGEN	Stormwater is increasingly being valued as a freshwater resource in arid regions and can provide opportunities for beneficial reuse via aquifer recharge if adequate pollutant removal can be achieved. We envision a multi-unit operation approach to capture, treat, and recharge (CTR) stormwater using low energy, cost-effective technologies appropriate for larger magnitude, less frequent events. Here…	[Ashoori, Negin; Teixido, Marc; Spahr, Stephanie; LeFevre, Gregory H.; Sedlak, David L.; Luthy, Richard G.] Natl Sci Fdn, Engn Res Ctr, Reinventing Nations Urban Water Infrastruct ReNUW, Stanford, CA USA; [Ashoori, Negin; Spahr, Stephanie; Luthy, Richard G.] Stanford Univ, Dept Civil & Environm Engn, Stanford, CA 94305 USA; [Teixido, Marc; Sedlak, David L.] Univ Calif Berkeley, Dept Civil & Envir…	National Science Foundation (NSF); Stanford University; University of California System; University of California Berkeley; University of Iowa; University of Iowa	Luthy, RG (corresponding author), Stanford Univ, Jerry Yang & Akiko Yamazaki Environm & Energy Bld, Stanford, CA 94305 USA.	luthy@stanford.edu	Teixidó, Marc/HLV-9398-2023; Spahr, Stephanie/AAF-1490-2019	Teixidó, Marc/0000-0002-1225-8047; Spahr, Stephanie/0000-0002-3004-3162; LeFevre, Gregory/0000-0002-7746-0297; Luthy, Richard/0000-0003-0274-0240	Water Research Foundation [4567]; National Science Foundation Engineering Research Center Program for Reinventing the Nation's Urban Water Infrastructure [ReNUWIt NSF ERC 1028968]	Water Research Foundation; National Science Foundation Engineering Research Center Program for Reinventing the Nation's Urban Water Infrastructure	This work was supported by the Water Research Foundation (Project #4567) and the National Science Foundation Engineering Research Center Program for Reinventing the Nation's Urban Water Infrastructure (ReNUWIt NSF ERC 1028968). We thank Donald Dillard and Dr. Brian Halaburka for their time and effort in building the field setup and Stanley Gu for his assistance in the laboratory experiments. We t…		69	109	118	20	414	PERGAMON-ELSEVIER SCIENCE LTD	OXFORD	THE BOULEVARD, LANGFORD LANE, KIDLINGTON, OXFORD OX5 1GB, ENGLAND	0043-1354			WATER RES	Water Res.	MAY 1	2019	154
J	Li, Z; Xue, W; Zhou, WJ				Li, Zhu; Xue, Wen; Zhou, Wenjian			Mechanical Properties of Concrete with Different Carya Cathayensis Peel Biochar Additions	SUSTAINABILITY			English	Article						biochar; concrete; compressive strength; splitting-tensile strength; ITZ	CARBON; TEMPERATURE; STRENGTH; WASTE	Producing biochar by consuming biomass is an effective way to reduce the environmental impact from biomass waste. This study investigates the influence of biochar made of carya cathayensis peel biomass waste, which is a specific biomass in Zhejiang province, China, on concrete basic mechanical properties. The biochar was added into concrete mixtures in three different patterns, including: (1) add…	[Li, Zhu; Xue, Wen; Zhou, Wenjian] Zhejiang Univ Sci & Technol, Dept Civil Engn, Hangzhou 310023, Peoples R China	Zhejiang University of Science & Technology	Xue, W (corresponding author), Zhejiang Univ Sci & Technol, Dept Civil Engn, Hangzhou 310023, Peoples R China.	xuewen@zust.edu.cn			Zhejiang University of Science and Technology [2021QN077]	Zhejiang University of Science and Technology(Zhejiang University of Science & Technology)	This research was funded by the Research funding of Zhejiang University of Science and Technology grant number 2021QN077.		35	0	0	9	9	MDPI	BASEL	ST ALBAN-ANLAGE 66, CH-4052 BASEL, SWITZERLAND		2071-1050		SUSTAINABILITY-BASEL	Sustainability	MAR	2023	15	6
J	Winters, D; Boakye, K; Simske, S				Winters, Dahl; Boakye, Kwaku; Simske, Steven			Toward Carbon-Neutral Concrete through Biochar-Cement-Calcium Carbonate Composites: A Critical Review	SUSTAINABILITY			English	Review						biocement; biochar; calcium carbonate; carbon storage; carbon-neutral concrete; clinker reduction; compressive strength; UHPC	LIFE-CYCLE ASSESSMENT; MECHANICAL-PROPERTIES; PERFORMANCE; WASTE; SEQUESTRATION; WORKABILITY; TECHNOLOGY; STRENGTH; MORTAR	High-density, high-permanence forms of carbon storage are in demand to save storage space on land or at sea while allowing the world to reach its climate targets. Biochar and calcium carbonate are two such forms that have been considered largely separately in the literature for carbon storage. In this paper, we consider how biochar and calcium carbonate might interact when they are used together …	[Winters, Dahl; Boakye, Kwaku; Simske, Steven] Colorado State Univ, Syst Engn Dept, Ft Collins, CO 80523 USA	Colorado State University	Simske, S (corresponding author), Colorado State Univ, Syst Engn Dept, Ft Collins, CO 80523 USA.	dahl.winters@colostate.edu; kwaku.boakye@colostate.edu; steve.simske@colostate.edu		Winters, Dahl/0000-0002-0073-0711; Simske, Steven/0000-0002-6937-1956; Boakye, Kwaku/0000-0003-0351-0746					97	12	12	27	71	MDPI	BASEL	ST ALBAN-ANLAGE 66, CH-4052 BASEL, SWITZERLAND		2071-1050		SUSTAINABILITY-BASEL	Sustainability	APR	2022	14	8
J	Xie, C; Yuan, LJ; Tan, H; Zhang, YZ; Zhao, M; Jia, YH				Xie, Chao; Yuan, Linjuan; Tan, Hao; Zhang, Yuze; Zhao, Min; Jia, Yinghui			Experimental study on the water purification performance of biochar-modified pervious concrete	CONSTRUCTION AND BUILDING MATERIALS			English	Article						Pervious concrete; Water purification; Biochar; Water purification mechanism	PLANT-GROWTH; ROAD RUNOFF; REMOVAL; CEMENT; NITROGEN; CARBON	Pervious concrete, a kind of porous material, is commonly used in permeable pavement and ecological slope protection. Biochar has the characteristics of absorbing pollutants and improving the performance of concrete. Therefore, the purification performance of different contents of biochar-modified pervious concrete on sewage was studied in this work. The experimental results show that the perviou…	[Xie, Chao; Yuan, Linjuan; Tan, Hao; Zhang, Yuze; Zhao, Min; Jia, Yinghui] China Agr Univ, Coll Water Conservancy & Civil Engn, Beijing 100083, Peoples R China	China Agricultural University	Yuan, LJ (corresponding author), China Agr Univ, Coll Water Conservancy & Civil Engn, Beijing 100083, Peoples R China.	545694128@qq.com; linjuanyuan@cau.edu.cn			National Key Research and Development Program of China [2017YFC0404905]	National Key Research and Development Program of China	The authors would like to acknowledge the financial support from the National Key Research and Development Program of China (2017YFC0404905) .		37	14	14	22	108	ELSEVIER SCI LTD	OXFORD	THE BOULEVARD, LANGFORD LANE, KIDLINGTON, OXFORD OX5 1GB, OXON, ENGLAND	0950-0618	1879-0526		CONSTR BUILD MATER	Constr. Build. Mater.	MAY 24	2021	285
J	Chen, SS; Tsang, DCW; He, MJ; Sun, YQ; Lau, LSY; Leung, RWM; Lau, ESC; Hou, DY; Liu, A; Mohanty, S				Chen, Season S.; Tsang, Daniel C. W.; He, Mingjing; Sun, Yuqing; Lau, Leslie S. Y.; Leung, Richard W. M.; Lau, Edwin S. C.; Hou, Deyi; Liu, An; Mohanty, Sanjay			Designing sustainable drainage systems in subtropical cities: Challenges and opportunities	JOURNAL OF CLEANER PRODUCTION			English	Review						Stormwater management; Sustainable drainage systems; Low impact development; Filter media; Engineered biochar; Climate change impact	ASSESSING COST-EFFECTIVENESS; URBAN STORMWATER MANAGEMENT; POLLUTANT REMOVAL; WATER-QUALITY; BIORETENTION SYSTEM; NITRATE REMOVAL; CLIMATE-CHANGE; OPTIMIZATION MODEL; FIELD PERFORMANCE; ESCHERICHIA-COLI	Sustainable urban water management requires a paradigm shift from using conventional system to drain stormwater as waste to using innovative stormwater management technique to harvest and reuse the water. Sustainable Drainage Systems (SuDS) are designed to achieve the goal. Although SuDS have been used for almost two decades, the implementation has been predominantly in temperate region. The impl…	[Chen, Season S.; Tsang, Daniel C. W.; He, Mingjing; Sun, Yuqing] Hong Kong Polytech Univ, Dept Civil & Environm Engn, Hung Hom, Kowloon, Hong Kong, Peoples R China; [Lau, Leslie S. Y.; Leung, Richard W. M.; Lau, Edwin S. C.] Govt Hong Kong Special Adm Reg, Drainage Serv Dept, Hong Kong, Peoples R China; [Hou, Deyi] Tsinghua Univ, Sch Environm, Beijing 100084, Peoples R China; [Liu, An] Shenzhen …	Hong Kong Polytechnic University; Tsinghua University; Shenzhen University; University of California System; University of California Los Angeles	Tsang, DCW (corresponding author), Hong Kong Polytech Univ, Dept Civil & Environm Engn, Hung Hom, Kowloon, Hong Kong, Peoples R China.	dan.tsang@polyu.edu.hk	Tsang, Dan/E-5442-2012; Mohanty, Sanjay K/H-9304-2013; Sun, Yuqing/AAX-6464-2021; Sun, Yuqing/Q-2469-2019	Tsang, Dan/0000-0002-6850-733X; Mohanty, Sanjay K/0000-0002-2142-5572; Sun, Yuqing/0000-0003-1022-4705; Sun, Yuqing/0000-0003-1022-4705; Liu, An/0000-0002-1678-5012; HE, Mingjing/0000-0001-5181-0765	Hong Kong Environment and Conservation Fund (ECF Project) [87/2017]; Hong Kong Research Grants Council [E-PolyU503-17]; Drainage Services Department of Government of the Hong Kong Special Administrative Region	Hong Kong Environment and Conservation Fund (ECF Project); Hong Kong Research Grants Council(Hong Kong Research Grants Council); Drainage Services Department of Government of the Hong Kong Special Administrative Region	The authors appreciate the financial support from the Hong Kong Environment and Conservation Fund (ECF Project 87/2017), Hong Kong Research Grants Council (E-PolyU503-17), and Drainage Services Department of Government of the Hong Kong Special Administrative Region for this study.		140	13	13	8	80	ELSEVIER SCI LTD	OXFORD	THE BOULEVARD, LANGFORD LANE, KIDLINGTON, OXFORD OX5 1GB, OXON, ENGLAND	0959-6526	1879-1786		J CLEAN PROD	J. Clean Prod.	JAN 20	2021	280		2
J	Kaya, D; Croft, K; Pamuru, ST; Yuan, C; Davis, AP; Kjellerup, BV				Kaya, Devrim; Croft, Kristen; Pamuru, Sai Thejaswini; Yuan, Chen; Davis, Allen P.; Kjellerup, Birthe V.			Considerations for evaluating innovative stormwater treatment media for removal of dissolved contaminants of concern with focus on biochar	CHEMOSPHERE			English	Article						Stormwater; Biochar; Contaminants of concern; Evaluation of media; Stormwater control measures; Treatment media	POLYCYCLIC AROMATIC-HYDROCARBONS; PYROLYSIS TEMPERATURE; ACTIVATED CARBON; HEAVY-METALS; AQUEOUS-SOLUTIONS; POLLUTANT REMOVAL; LOW-COST; POLYCHLORINATED-BIPHENYLS; COMPETITIVE SORPTION; PRIORITY POLLUTANTS	Stormwater from complex land uses is an important contributor of contaminants of concern (COCs) such as polychlorinated biphenyls (PCBs), polycyclic aromatic hydrocarbons (PAHs), Copper, and Zinc to receiving water bodies. A large portion of these COCs bind to particulate matter in stormwater, which can be removed through filtration by traditional media. However, the remaining dissolved COCs can …	[Kaya, Devrim; Croft, Kristen; Pamuru, Sai Thejaswini; Yuan, Chen; Davis, Allen P.; Kjellerup, Birthe V.] Univ Maryland, Dept Civil & Environm Engn, College Pk, MD 20742 USA; [Kaya, Devrim] Oregon State Univ, Sch Chem Biol & Environm Engn, Corvallis, OR 97331 USA	University System of Maryland; University of Maryland College Park; Oregon State University	Kjellerup, BV (corresponding author), Univ Maryland, Dept Civil & Environm Engn, College Pk, MD 20742 USA.	bvk@umd.edu		Kjellerup, Birthe/0000-0001-5069-7641; Croft, Kristen/0000-0002-9626-3870; Yuan, Chen/0000-0002-7162-8108	Strategic Environmental Research and Development Program (SERDP) [ER18-C3- 1303]; National Science Foundation National Research Traineeship Program [1828910]; Direct For Education and Human Resources; Division Of Graduate Education [1828910] Funding Source: National Science Foundation	Strategic Environmental Research and Development Program (SERDP); National Science Foundation National Research Traineeship Program; Direct For Education and Human Resources; Division Of Graduate Education(National Science Foundation (NSF)NSF - Directorate for STEM Education (EDU))	Funding for this study was provided by The Strategic Environmental Research and Development Program (SERDP) via project ER18-C3- 1303. Kristen Croft and Sai Pamuru were supported by NRT-INFEWS: UMD Global STEWARDS (STEM Training at the Nexus of Energy, WAter Reuse and FooD Systems) that was awarded to the University of Mary- land School of Public Health by the National Science Foundation National…		136	3	3	6	21	PERGAMON-ELSEVIER SCIENCE LTD	OXFORD	THE BOULEVARD, LANGFORD LANE, KIDLINGTON, OXFORD OX5 1GB, ENGLAND	0045-6535	1879-1298		CHEMOSPHERE	Chemosphere	NOV	2022	307		4
J	Liu, JW; Li, H; Harvey, J; Zhang, HJ; Tian, Y				Liu, Jiawen; Li, Hui; Harvey, John; Zhang, Hengji; Tian, Yu			Application of Biochar on the runoff purification performance of porous asphalt pavement	TRANSPORTATION SAFETY AND ENVIRONMENT			English	Article						urban runoff; biochar; porous asphalt mixture; filter layer; purification performance	REMOVAL; CARBON; SOILS	Biochar is currently applied in many low-impact development measures, such as biofilters and filter strips. However, its application in permeable pavement is limited. Due to the wide range of raw material sources, biochar may also contain nutrients and heavy metals. Whether its leachate will cause contamination during application remains unknown. Based on the static leachate contamination test, t…	[Liu, Jiawen; Li, Hui; Tian, Yu] Tongji Univ, Key Lab Rd & Traff Engn, Minist Educ, Coll Transportat Engn, 4800 Caoan Rd, Shanghai 201804, Peoples R China; [Harvey, John] Univ Calif Davis, Pavement Res Ctr, Dept Civil & Environm Engn, Davis, CA 95616 USA; [Zhang, Hengji] Shanxi Yellow River Frontier Mat Res Inst Co Ltd, Taiyuan 030000, Peoples R China	Tongji University; University of California System; University of California Davis	Li, H (corresponding author), Tongji Univ, Key Lab Rd & Traff Engn, Minist Educ, Coll Transportat Engn, 4800 Caoan Rd, Shanghai 201804, Peoples R China.	hli@tongji.edu.cn			Fundamental Research Funds for the Central Universities of China [22120210027]	Fundamental Research Funds for the Central Universities of China(Fundamental Research Funds for the Central Universities)	The research was supported by a grant from the Fundamental Research Funds for the Central Universities of China (Grant No. 22120210027). The contents of this paper only reflect the views of the authors and do not reflect the official views or policies of the sponsors.		32	5	5	0	4	OXFORD UNIV PRESS	OXFORD	GREAT CLARENDON ST, OXFORD OX2 6DP, ENGLAND		2631-4428		TRANSP SAFETY ENV	Transp. Saf. Environ.	DEC 30	2021	3	4
J	Anwar, FH; El-Hassan, H; Hamouda, M; Hinge, G; Mo, KH				Anwar, Faiz Habib; El-Hassan, Hilal; Hamouda, Mohamed; Hinge, Gilbert; Mo, Kim Hung			Meta-Analysis of the Performance of Pervious Concrete with Cement and Aggregate Replacements	BUILDINGS			English	Review						pervious concrete; cement replacement; aggregate replacement; recycled aggregate; industrial waste materials; mechanical; hydraulic; durability	SUSTAINABLE PAVEMENT MATERIAL; ALKALI-ACTIVATED SLAG; OF-THE-ART; MECHANICAL-PROPERTIES; FLY-ASH; PERMEABILITY; STRENGTH; BIOCHAR; RUNOFF; BINDER	In recent years, pervious concrete (PC) has gained much attention as one of the strategies for low-impact development (LID) in pavements due to its structural, economic, and road-user benefits. This study sought to review and evaluate changes in the mechanical, hydraulic, and durability performance of PC produced with cement and aggregate replacements. A meta-analysis was conducted to elucidate t…	[Anwar, Faiz Habib; El-Hassan, Hilal; Hamouda, Mohamed; Hinge, Gilbert] United Arab Emirates Univ, Dept Civil & Environm Engn, POB 15551, Al Ain, U Arab Emirates; [Mo, Kim Hung] Univ Malaya, Dept Civil Engn, Kuala Lumpur 50603, Malaysia	United Arab Emirates University; Universiti Malaya	El-Hassan, H (corresponding author), United Arab Emirates Univ, Dept Civil & Environm Engn, POB 15551, Al Ain, U Arab Emirates.	202090162@uaeu.ac.ae; helhassan@uaeu.ac.ae; m.hamouda@uaeu.ac.ae; ghinge@uaeu.ac.ae; khmo@um.edu.my	Hamouda, Mohamed A./I-1823-2016; Hinge, Gilbert/GLQ-6942-2022; Mo, Kim Hung/F-4097-2015	Hamouda, Mohamed A./0000-0003-1797-4904; Mo, Kim Hung/0000-0001-5122-8839; El-Hassan, Hilal/0000-0001-9349-350X; Anwar, Faiz Habib/0000-0002-1184-1599	ASPIRE UAE [21N235]; National Water and Energy Center at UAE University [12R019]	ASPIRE UAE; National Water and Energy Center at UAE University	The authors acknowledge the financial support from ASPIRE UAE under Grant Number 21N235 and from the National Water and Energy Center at UAE University under Grant Number 12R019.		73	4	4	4	27	MDPI	BASEL	ST ALBAN-ANLAGE 66, CH-4052 BASEL, SWITZERLAND		2075-5309		BUILDINGS-BASEL	BUILDINGS-BASEL	APR	2022	12	4
J	Dixit, A; Gupta, S; Pang, SD; Kua, HW				Dixit, Anjaneya; Gupta, Souradeep; Pang, Sze Dai; Kua, Harn Wei			Waste Valorisation using biochar for cement replacement and internal curing in ultra-high performance concrete	JOURNAL OF CLEANER PRODUCTION			English	Article						Ultra-high performance concrete (UHPC); Biochar; Internal curing; Hydration; Cement replacement	RUBBER-WOOD-SAWDUST; POTENTIAL USE; BLACK CARBON; HYDRATION; COMPOSITES; STRENGTH; SEQUESTRATION; PREDICTION; PYROLYSIS; ADMIXTURE	The degree of hydration in ultra-high performance concrete (UHPC) is known to be low due to low water-cement ratio, leading to a substantial portion of cement merely being an expensive filler. The study presented herein demonstrates the potential of biochar as a mineral additive for cement replacement in UHPC, enhancing hydration due to its internal curing and nucleation effects. Biochar was prep…	[Dixit, Anjaneya; Pang, Sze Dai] Natl Univ Singapore, Dept Civil & Environm Engn, Singapore, Singapore; [Gupta, Souradeep; Kua, Harn Wei] Natl Univ Singapore, Sch Design & Environm, Dept Bldg, Singapore, Singapore	National University of Singapore; National University of Singapore	Pang, SD (corresponding author), Natl Univ Singapore, Dept Civil & Environm Engn, Singapore, Singapore.	ceepsd@nus.edu.sg	DIXIT, ANJANEYA/AAA-2190-2021	DIXIT, ANJANEYA/0000-0002-3045-0761; Gupta, Souradeep/0000-0003-1130-5400	Ministry of Education of Singapore (Academic Research Fund) [R-302-000-183-114]	Ministry of Education of Singapore (Academic Research Fund)(Ministry of Education, Singapore)	The financial support from the Ministry of Education of Singapore (Academic Research Fund Tier 1 Grant no. R-302-000-183-114) is kindly acknowledged. The authors appreciate the technical support from the Structural Engineering Laboratory, Department of Civil and Environmental Engineering, National University of Singapore.		65	83	84	8	94	ELSEVIER SCI LTD	OXFORD	THE BOULEVARD, LANGFORD LANE, KIDLINGTON, OXFORD OX5 1GB, OXON, ENGLAND	0959-6526	1879-1786		J CLEAN PROD	J. Clean Prod.	NOV 20	2019	238
J	Mitchell, CJ; Jayakaran, AD; McIntyre, JK				Mitchell, Chelsea J.; Jayakaran, Anand D.; McIntyre, Jenifer K.			Biochar and fungi as bioretention amendments for bacteria and PAH removal from stormwater	JOURNAL OF ENVIRONMENTAL MANAGEMENT			English	Article						Bioretention; Stormwater; Biochar; Fungi; Bacteria; PAHs	ESCHERICHIA-COLI REMOVAL; URBAN PARTICLE CAPTURE; RUNOFF; MEDIA; SCALE; PERFORMANCE; POLLUTANTS; HYDROLOGY; COMMUNITY; TOXICITY	Bioretention has been widely used to mitigate hydrologic impacts of stormwater runoff and is increasingly being relied upon to treat chemical and biological pollutants transported by stormwater. Despite this reliance, we still lack an understanding of treatment performance for certain organic and biological contaminants which may interact with biotic and abiotic components of bioretention systems…	[Mitchell, Chelsea J.; Jayakaran, Anand D.; McIntyre, Jenifer K.] Washington State Univ Puyallup, 2606 W Pioneer Ave, Puyallup, WA 98371 USA	Washington State University	Jayakaran, AD (corresponding author), Washington State Univ Puyallup, 2606 W Pioneer Ave, Puyallup, WA 98371 USA.	anand.jayakaran@wsu.edu	; Jayakaran, Anand/M-2441-2016	Mitchell, Chelsea/0000-0002-1247-2975; Jayakaran, Anand/0000-0003-2605-9759	United States Environmental Protection Agency [01J18101, C1800116]	United States Environmental Protection Agency(United States Environmental Protection Agency)	This work has been funded wholly or in part by the United States Environmental Protection Agency under assistance agreement 01J18101 to the Washington State Department of Ecology interagency agreement (IAA) IAA No. C1800116 between the State of Washington, Department of Ecology, and Washington State University.		59	0	0	13	20	ACADEMIC PRESS LTD- ELSEVIER SCIENCE LTD	LONDON	24-28 OVAL RD, LONDON NW1 7DX, ENGLAND	0301-4797	1095-8630		J ENVIRON MANAGE	J. Environ. Manage.	FEB 1	2023	327
J	Mohamed, BA; Huang, CR; Mok, N; Swei, O; Johnston, C; Li, LY				Mohamed, Badr A.; Huang, Carol; Mok, Nico; Swei, Omar; Johnston, Chris; Li, Loretta Y.			A comparative life-cycle assessment and cost analysis of biofilters amended with sludge-based activated carbon and commercial activated carbon for stormwater treatment	JOURNAL OF HAZARDOUS MATERIALS			English	Article						Sludge -based activated carbon; Urban stormwater management; Bioretention cell; Life -cycle assessment; Economic feasibility	ORGANIC CONTAMINANTS; ESCHERICHIA-COLI; SEDIMENT REMOVAL; BIORETENTION; BIOCHAR; WATER; PERFORMANCE; NUTRIENT; GREEN; POLLUTANTS	Environmental and economic issues resulting from the unsustainable management of sewage sludge from wastewater have necessitated the development of eco-friendly sewage sludge disposal methods, whereas stormwater effluent contains tremendous amounts of pollutants. This study compares the feasibility and envi-ronmental impacts associated with incorporating biofilters with sludge-based activated car…	[Mohamed, Badr A.; Huang, Carol; Mok, Nico; Swei, Omar; Li, Loretta Y.] Univ British Columbia, Dept Civil Engn, 6250 Appl Sci Lane, Vancouver, BC 614, Canada; [Mohamed, Badr A.] Cairo Univ, Dept Agr Engn, El-Gamma St, Giza, Egypt; [Johnston, Chris] Kerr Wood Leidal Associates Ltd, 200-4185 Still Creek Dr, Burnaby, BC 569, Canada	University of British Columbia; Egyptian Knowledge Bank (EKB); Cairo University	Li, LY (corresponding author), Univ British Columbia, Dept Civil Engn, 6250 Appl Sci Lane, Vancouver, BC 614, Canada.	lli@civil.ubc.ca	Mohamed, Badr A./CAH-1365-2022; Huang, Carol/HTP-6398-2023	Mohamed, Badr A./0000-0002-5550-886X;	Mathematics of Information Technology and Complex Systems (Mitacs) [IT14321]; Environmental Careers Organization of Canada (ECO CANADA) Co-op Program in the Student Work Placement Program - Employment and Social Development Canada [12899]; ECO Canada Youth Employment Placement [12370]; UBC Applied Science Co-op Dean's Wage Subsidy in Summer 2020	Mathematics of Information Technology and Complex Systems (Mitacs); Environmental Careers Organization of Canada (ECO CANADA) Co-op Program in the Student Work Placement Program - Employment and Social Development Canada; ECO Canada Youth Employment Placement; UBC Applied Science Co-op Dean's Wage Subsidy in Summer 2020	The authors would like to thank the Mathematics of Information Technology and Complex Systems (Mitacs) [grant number IT14321] , Environmental Careers Organization of Canada (ECO CANADA) Co-op Program in the Student Work Placement Program (SWPP) funded by the Employment and Social Development Canada [grant number 12899] , ECO Canada Youth Employment Placement funding program [grant number 12370] a…		80	4	4	7	8	ELSEVIER	AMSTERDAM	RADARWEG 29, 1043 NX AMSTERDAM, NETHERLANDS	0304-3894	1873-3336		J HAZARD MATER	J. Hazard. Mater.	MAR 5	2023	445
J	Afrooz, ARMN; Pitol, AK; Kitt, D; Boehm, AB				Afrooz, A. R. M. Nabiul; Pitol, Ana K.; Kitt, Dianna; Boehm, Alexandria B.			Role of microbial cell properties on bacterial pathogen and coliphage removal in biochar-modified stormwater biofilters	ENVIRONMENTAL SCIENCE-WATER RESEARCH & TECHNOLOGY			English	Article							ESCHERICHIA-COLI REMOVAL; BED FILTRATION THEORY; POROUS-MEDIA; TRANSPORT; DEPOSITION; ATTACHMENT; RETENTION; MINIMUM; VIRUSES	Stormwater biofilters are distributed stormwater control measures for managing urban runoff. Recent work has shown that adding biochar to biofilters can reduce stormwater contaminant concentrations, including fecal indicator bacteria (FIB). However, the potential of biochar-augmented biofilters to remove human pathogens from stormwater has not been investigated. In this study, we investigated the…	[Afrooz, A. R. M. Nabiul; Boehm, Alexandria B.] Stanford Univ, Dept Civil & Environm Engn, 473 Via Ortega, Stanford, CA 94305 USA; [Afrooz, A. R. M. Nabiul; Kitt, Dianna; Boehm, Alexandria B.] Engn Res Ctr ERC Reinventing Nations Urban Water, Golden, CO 80401 USA; [Afrooz, A. R. M. Nabiul] SCCWRP, Costa Mesa, CA 92626 USA; [Pitol, Ana K.] Eawag, Swiss Fed Res Inst Aquat Sci & Technol, CH-8600 Dub…	Stanford University; Southern California Coastal Water Research Project; Swiss Federal Institutes of Technology Domain; Swiss Federal Institute of Aquatic Science & Technology (EAWAG); Swiss Federal Institutes of Technology Domain; Ecole Polytechnique Federale de Lausanne; University of Illinois System; University of Illinois Urbana-Champaign	Boehm, AB (corresponding author), Stanford Univ, Dept Civil & Environm Engn, 473 Via Ortega, Stanford, CA 94305 USA.;Boehm, AB (corresponding author), Engn Res Ctr ERC Reinventing Nations Urban Water, Golden, CO 80401 USA.	aboehm@stanford.edu		Boehm, Alexandria/0000-0002-8162-5090; Afrooz, Nabiul/0000-0002-0588-6942	Re-inventing Nations Urban Water Infrastructure (ReNUWIt), an Engineering Research Center (ERC) - U.S. National Science Foundation [EEC-1028968]	Re-inventing Nations Urban Water Infrastructure (ReNUWIt), an Engineering Research Center (ERC) - U.S. National Science Foundation	This work is supported by Re-inventing Nations Urban Water Infrastructure (ReNUWIt), an Engineering Research Center (ERC) funded by the U.S. National Science Foundation (Grant#EEC-1028968). We thank Dr. Sanjay Mohanty (University of California, Los Angeles) for his suggestions to improve the manuscript.		44	27	28	0	72	ROYAL SOC CHEMISTRY	CAMBRIDGE	THOMAS GRAHAM HOUSE, SCIENCE PARK, MILTON RD, CAMBRIDGE CB4 0WF, CAMBS, ENGLAND	2053-1400	2053-1419		ENVIRON SCI-WAT RES	Environ. Sci.-Wat. Res. Technol.	DEC 1	2018	4	12
J	Faiz, H; Ng, S; Rahman, M				Faiz, Hamid; Ng, Serina; Rahman, Mahfuzur			A state-of-the-art review on the advancement of sustainable vegetation concrete in slope stability	CONSTRUCTION AND BUILDING MATERIALS			English	Review						Slope stability; Sustainable vegetation concrete; Infrastructure development; Strength; Durability	PERVIOUS CONCRETE; PLANTING CONCRETE; CEMENTITIOUS MATERIALS; PAVEMENT MATERIAL; SEED-GERMINATION; EROSION CONTROL; STRAW MULCH; SOIL; PERFORMANCE; BIOCHAR	Slope stability and ecological restoration of steep slopes caused by infrastructure development such as highways, railways, and water conservancy projects are generally challenging, especially for rocky slopes, which are unfavorable for vegetation growth. Vegetation concrete is an excellent material that enhances the landscape, prevents pollution, and is environmentally sustainable. The vegetatio…	[Faiz, Hamid; Ng, Serina] Shijiazhuang ChangAn Yucai Bldg Mat Co Ltd, Res & Dev Ctr, Shijiazhuang 051430, Hebei, Peoples R China; [Rahman, Mahfuzur] Int Univ Business Agr & Technol IUBAT, Dept Civil Engn, Dhaka 1230, Bangladesh	International University of Business Agriculture & Technology (IUBAT)	Ng, S (corresponding author), Shijiazhuang ChangAn Yucai Bldg Mat Co Ltd, Res & Dev Ctr, Shijiazhuang 051430, Hebei, Peoples R China.	Serina.ng@sjzcayc.com							135	13	13	51	140	ELSEVIER SCI LTD	OXFORD	THE BOULEVARD, LANGFORD LANE, KIDLINGTON, OXFORD OX5 1GB, OXON, ENGLAND	0950-0618	1879-0526		CONSTR BUILD MATER	Constr. Build. Mater.	APR 4	2022	326
C	Dixit, A; Gupta, S; Pang, SD; Kua, HW		Boshoff, WP; Combrinck, R; Mechtcherine, V; Wyrzykowski, M		Dixit, Anjaneya; Gupta, Souradeep; Pang, Sze Dai; Kua, Harn Wei			Cement Replacement and Improved Hydration in Ultra-High Performance Concrete Using Biochar	3RD INTERNATIONAL CONFERENCE ON THE APPLICATION OF SUPERABSORBENT POLYMERS (SAP) AND OTHER NEW ADMIXTURES TOWARDS SMART CONCRETE	RILEM Bookseries		English	Proceedings Paper	3rd International Conference on the Application of Superabsorbent Polymers (SAP) and Other New Admixtures Towards Smart Concrete	NOV 25-27, 2019	Skukuza, SOUTH AFRICA			Ultra-high performance concrete (UHPC); Biochar; Hydration; Internal curing		This study demonstrates the efficacy of biochar in a dual role of internal curing agent as well as a viable candidate for cement replacement in ultra-high performance concrete (UHPC). Bio-char (BC), a product of pyrolysis of mixed wood saw dust, was prepared by pyrolytic conversion at 500 degrees C. Biochar produced was manually grinded into micron-sized particles. It was then pre-soaked for 24 h…	[Dixit, Anjaneya; Pang, Sze Dai] Natl Univ Singapore, Dept Civil & Environm Engn, Singapore, Singapore; [Gupta, Souradeep; Kua, Harn Wei] Natl Univ Singapore, Sch Design & Environm, Singapore, Singapore	National University of Singapore; National University of Singapore	Dixit, A (corresponding author), Natl Univ Singapore, Dept Civil & Environm Engn, Singapore, Singapore.	anjaneya.dixit@u.nus.edu; gupta.souradeep@u.nus.edu; ceepsd@nus.edu.sg; bdgkuahw@nus.edu.sg	DIXIT, ANJANEYA/AAA-2190-2021	DIXIT, ANJANEYA/0000-0002-3045-0761; Gupta, Souradeep/0000-0003-1130-5400	National University of Singapore by Singapore Ministry of Education Academic Research Fund Tier 1 Grant [R-302-000-183-114]	National University of Singapore by Singapore Ministry of Education Academic Research Fund Tier 1 Grant	This research was supported in the National University of Singapore by Singapore Ministry of Education Academic Research Fund Tier 1 Grant (No. R-302-000-183-114).		10	4	4	3	25	SPRINGER	DORDRECHT	PO BOX 17, 3300 AA DORDRECHT, NETHERLANDS	2211-0844	2211-0852	978-3-030-33342-3; 978-3-030-33341-6	RILEM BOOKSER			2020	24
J	Peng, YC; Deng, SY; Kong, Z; Yuan, YS; Long, H; Fang, JH; Ma, HY; Shao, ZY; He, Q; Chai, HX				Peng, Yuanchun; Deng, Shuyang; Kong, Zheng; Yuan, Yunsong; Long, Hao; Fang, Junhua; Ma, Haiyuan; Shao, Zhiyu; He, Qiang; Chai, Hongxiang			Biochar and woodchip amended bioreactor extending reactive volume for enhanced denitrification in stormwater runoff	JOURNAL OF WATER PROCESS ENGINEERING			English	Article						Low impact development; Bioretention system; Heterotrophic denitrification; Dissolved nitrogen; Internal water storage zone	ZERO-VALENT IRON; NITROGEN REMOVAL; BIORETENTION; PERFORMANCE; SCALE; IMPLEMENTATION; BIOFILTERS; NUTRIENT; BACTERIA; QUALITY	Bioretention has been increasingly used in stormwater runoff treatment. However, its performance was often restricted by poor treatment or even the net leaching of nitrate. To solve this problem, a biochar-woodchip modified bioretention system was developed in this study. The modified system greatly enhanced the nitrogen removal than the conventional sand bioretention system. The nitrate removal …	[Peng, Yuanchun; Deng, Shuyang; Long, Hao; Chai, Hongxiang] Chongqing Univ, Key Lab New Technol Construct Cities Mt Area, Minist Educ, Chongqing 400045, Peoples R China; [Peng, Yuanchun; Kong, Zheng; Yuan, Yunsong; Fang, Junhua; Ma, Haiyuan; Shao, Zhiyu; He, Qiang; Chai, Hongxiang] Chongqing Univ, Key Lab Three Gorges Reservoir Reg Ecoenvironm, Minist Educ, Chongqing 400045, Peoples R China	Chongqing University; Chongqing University	Chai, HX (corresponding author), Chongqing Univ, Key Lab New Technol Construct Cities Mt Area, Minist Educ, Chongqing 400045, Peoples R China.;Ma, HY; Chai, HX (corresponding author), Chongqing Univ, Key Lab Three Gorges Reservoir Reg Ecoenvironm, Minist Educ, Chongqing 400045, Peoples R China.	mahy@cqu.edu.cn; chaihx@cqu.edu.cn	Shao, Zhiyu/HCI-2889-2022; MA, HAIYUAN/AAT-8931-2021; Kong, Zheng/AAD-9290-2022	Shao, Zhiyu/0000-0002-5565-1578; Kong, Zheng/0000-0002-1008-5912	National Natural Sci-ence Foundation of China [51878094]; Creative Research Groups in Colleges and Universities of Chongqing [CXQT21001]; (Water Environment Protection and Management in Mountainous City)	National Natural Sci-ence Foundation of China(National Natural Science Foundation of China (NSFC)); Creative Research Groups in Colleges and Universities of Chongqing; (Water Environment Protection and Management in Mountainous City)	We acknowledge the financial support of the National Natural Sci-ence Foundation of China (No. 51878094) and the support of Creative Research Groups in Colleges and Universities of Chongqing (No. CXQT21001, Water Environment Protection and Management in Mountainous City) .		52	2	3	14	56	ELSEVIER	AMSTERDAM	RADARWEG 29, 1043 NX AMSTERDAM, NETHERLANDS	2214-7144			J WATER PROCESS ENG	J. Water Process. Eng.	APR	2022	46
J	Chen, HM; Ma, JY; Wei, JX; Gong, X; Yu, XC; Guo, H; Zhao, YW				Chen, Haoming; Ma, Jinyi; Wei, Jiaxing; Gong, Xin; Yu, Xichen; Guo, Hui; Zhao, Yanwen			Biochar increases plant growth and alters microbial communities via regulating the moisture and temperature of green roof substrates	SCIENCE OF THE TOTAL ENVIRONMENT			English	Article						Sludge biochar; Green roof substrate; Plant biomass; Phospholipid fatty acid analysis (PLEA); Microbial community; Path analysis model	SEWAGE-SLUDGE BIOCHAR; SOIL PROPERTIES; GAS EMISSIONS; CARBON; CHARCOAL; WATER; YIELD; RICE; AMENDMENT; IMPACT	Green roofs have increasingly been designed and applied to relieve environmental problems, such as water loss, air pollution as well as heat island effect Substrate and vegetation are important components of green roofs providing ecosystem services and benefiting the urban development. Biochar made from sewage sludge could be potentially used as the substrate amendment for green roofs, however, t…	[Chen, Haoming; Wei, Jiaxing; Gong, Xin; Guo, Hui; Zhao, Yanwen] Nanjing Agr Univ, Coll Resources & Environm Sci, Nanjing 210095, Jiangsu, Peoples R China; [Chen, Haoming; Zhao, Yanwen] Nanjing Agr Univ, Environm Impact Assessment Ctr, Nanjing, Jiangsu, Peoples R China; [Ma, Jinyi] Nanjing Agr Univ, Coll Hort, Nanjing, Jiangsu, Peoples R China; [Yu, Xichen] Nanjing Agr Univ, Coll Foreign Studies,…	Nanjing Agricultural University; Nanjing Agricultural University; Nanjing Agricultural University; Nanjing Agricultural University	Guo, H; Zhao, YW (corresponding author), Nanjing Agr Univ, Coll Resources & Environm Sci, Nanjing 210095, Jiangsu, Peoples R China.	hui.guo@niau.edu.cn; ywzhao@njau.edu.cn	gong, xin/IUM-2092-2023	gong, xin/0000-0002-8043-9173; Chen, Haoming/0000-0002-2227-3515	National Natural Science Foundation [31200530]	National Natural Science Foundation(National Natural Science Foundation of China (NSFC))	The work was supported by National Natural Science Foundation (31200530). We thank Courtney G. Collins for helpful discussion on the manuscript and thank three anonymous and the associate editor for their valuable comments and insightful suggestions.		79	70	81	21	199	ELSEVIER	AMSTERDAM	RADARWEG 29, 1043 NX AMSTERDAM, NETHERLANDS	0048-9697	1879-1026		SCI TOTAL ENVIRON	Sci. Total Environ.	SEP 1	2018	635
J	Xie, YF; Liu, A; Bandala, ER; Goonetilleke, A				Xie, Yaofeng; Liu, An; Bandala, Erick R.; Goonetilleke, Ashantha			TiO2-biochar composites as alternative photocatalyst for stormwater disinfection	JOURNAL OF WATER PROCESS ENGINEERING			English	Article						Stormwater reuse; Stormwater disinfection; Biochar; TiO2	ROOF-HARVESTED RAINWATER; URBAN ROAD SURFACES; SOUTHEAST QUEENSLAND; BIOCHAR; WATER; CONTAMINANTS; BUILDUP; DEGRADATION; REMOVAL; SYSTEMS	Presence of bacteria/pathogens in urban stormwater constrains its safe reuse and highlights disinfection as essential for its reclamation. The novelty of this study is the preparation of a series of TiO2-biochar composites, which are easily separable from water, with different mass ratio values and testing for bacteria removal in stormwater as an effective disinfection approach. Although TiO2-bio…	[Xie, Yaofeng; Liu, An] Shenzhen Univ, Coll Chem & Environm Engn, Shenzhen 518060, Peoples R China; [Liu, An] Shenzhen Univ, Coll Chem & Environm Engn, Water Sci & Environm Engn Res Ctr, Shenzhen 518060, Peoples R China; [Bandala, Erick R.] Desert Res Inst, Div Hydrol Sci, 755 E Flamingo Rd, Las Vegas, NV 89119 USA; [Goonetilleke, Ashantha] Queensland Univ Technol QUT, Sch Civil & Environm Engn, …	Shenzhen University; Shenzhen University; Nevada System of Higher Education (NSHE); Desert Research Institute NSHE; Queensland University of Technology (QUT)	Liu, A (corresponding author), Shenzhen Univ, Coll Chem & Environm Engn, Shenzhen 518060, Peoples R China.;Liu, A (corresponding author), Shenzhen Univ, Coll Chem & Environm Engn, Water Sci & Environm Engn Res Ctr, Shenzhen 518060, Peoples R China.	liuan@szu.edu.cn	Goonetilleke, Ashantha/I-9689-2012	Goonetilleke, Ashantha/0000-0002-8783-1223	National Natural Science Foundation of China [52170100, U21A2036]; Guangdong Basic and Applied Basic Research Foundation [2019A1515010843]; Shenzhen Science and Innovation Commis-sion [20200813094050001, JCYJ20200109113006046]	National Natural Science Foundation of China(National Natural Science Foundation of China (NSFC)); Guangdong Basic and Applied Basic Research Foundation; Shenzhen Science and Innovation Commis-sion	Acknowledgment We thank National Natural Science Foundation of China (52170100, U21A2036) , Guangdong Basic and Applied Basic Research Foundation (2019A1515010843) and Shenzhen Science and Innovation Commis-sion (20200813094050001 and JCYJ20200109113006046) for sup-porting this study.		37	4	4	4	22	ELSEVIER	AMSTERDAM	RADARWEG 29, 1043 NX AMSTERDAM, NETHERLANDS	2214-7144			J WATER PROCESS ENG	J. Water Process. Eng.	AUG	2022	48
J	Wijeyawardana, P; Nanayakkara, N; Law, D; Gunasekara, C; Karunarathna, A; Pramanik, BK				Wijeyawardana, Pamodithya; Nanayakkara, Nadeeshani; Law, David; Gunasekara, Chamila; Karunarathna, Anurudda; Pramanik, Biplob Kumar			Performance of biochar mixed cement paste for removal of Cu, Pb and Zn from stormwater	ENVIRONMENTAL RESEARCH			English	Article						Cement composite; Heavy metals; Adsorption; Biochar; Compressive strength; Kinetics	HEAVY-METAL REMOVAL; ACTIVATED CARBON; AQUEOUS-SOLUTIONS; PORTLAND-CEMENT; ADSORPTION; PYROLYSIS; ADSORBENT; RUNOFF; COPPER; WASTE	Using biochar as a partial replacement of Portland cement in cementitious materials is a promising solution to mitigate negative environmental impacts. However, current studies in available literature primarily focus on the mechanical properties of composites made with cementitious materials and biochar. Therefore, this paper reports the effects of the type of biochar, the percentage of biochar a…	[Wijeyawardana, Pamodithya; Law, David; Gunasekara, Chamila; Pramanik, Biplob Kumar] RMIT Univ Melbourne, Sch Engn, Melbourne, Vic, Australia; [Wijeyawardana, Pamodithya; Nanayakkara, Nadeeshani] Univ Peradeniya, Fac Engn, Getambe, Sri Lanka; [Karunarathna, Anurudda] Univ Peradeniya, Fac Agr, Getambe, Sri Lanka; [Pramanik, Biplob Kumar] RMIT Univ, Water Effect Technol & Tools WETT Res Ctr, Melbou…	Royal Melbourne Institute of Technology (RMIT); University of Peradeniya; University of Peradeniya; Royal Melbourne Institute of Technology (RMIT)	Pramanik, BK (corresponding author), RMIT Univ Melbourne, Sch Engn, Melbourne, Vic, Australia.	biplob.pramanik@rmit.edu.au		Law, David/0000-0001-8478-8103; Nanayakkara, Nadeeshani/0000-0002-2204-2063	RMIT University, Australia; University of Peradeniya, Sri Lanka	RMIT University, Australia; University of Peradeniya, Sri Lanka	The authors would like to thank RMIT University, Australia and the University of Peradeniya, Sri Lanka for the financial support.		77	0	0	7	7	ACADEMIC PRESS INC ELSEVIER SCIENCE	SAN DIEGO	525 B ST, STE 1900, SAN DIEGO, CA 92101-4495 USA	0013-9351	1096-0953		ENVIRON RES	Environ. Res.	SEP 1	2023	232
J	Tan, KH; Wang, JS				Tan, Kanghao; Wang, Junsong			Substrate modified with biochar improves the hydrothermal properties of green roofs	ENVIRONMENTAL RESEARCH			English	Article						Green roofs; Biochar; Substrate amendment; Runoff; Cooling effect	RUNOFF WATER QUANTITY; PERFORMANCE; IMPACT; SOIL; MANAGEMENT	Green roof, as an important measure of sponge city construction, is considered as a win-win alternative for alleviating rainwater runoff and urban heat island. The ecological benefits of green roofs are highly dependent on the quality of substrates. Biochar (BC) prepared from agricultural waste biomass has the potential to be used as a substrate amendment for green roofs. However, the influences …	[Tan, Kanghao; Wang, Junsong] South China Univ Technol, Sch Architecture, State Key Lab Subtrop Bldg Sci, Guangzhou 510640, Guangdong, Peoples R China; [Tan, Kanghao] Guangxi Univ, Coll Civil Engn & Architecture, 100 Univ Rd, Nanning 530004, Guangxi, Peoples R China	South China University of Technology; Guangxi University	Wang, JS (corresponding author), South China Univ Technol, Sch Architecture, State Key Lab Subtrop Bldg Sci, Guangzhou 510640, Guangdong, Peoples R China.	arwjs@mail.scut.edu.cn	Wang, Junsong/GNH-4461-2022	Wang, Junsong/0000-0002-2401-5771	National Natural Science Foundation of China; Guangdong Natural Science Foundation; State Key Lab of Subtropical Building Science, South China University of Technology; China Postdoctoral Science Foundation; [52008173]; [2022A1515010788]; [2021ZB20]; [2020M682706]	National Natural Science Foundation of China(National Natural Science Foundation of China (NSFC)); Guangdong Natural Science Foundation(National Natural Science Foundation of Guangdong Province); State Key Lab of Subtropical Building Science, South China University of Technology; China Postdoctoral Science Foundation(China Postdoctoral Science Foundation); ; ; ;	This work is jointly supported by the National Natural Science Foundation of China (No. 52008173) , Guangdong Natural Science Foundation (No. 2022A1515010788) , State Key Lab of Subtropical Building Science, South China University of Technology (No. 2021ZB20) , and China Postdoctoral Science Foundation (No. 2020M682706) .		42	13	13	18	27	ACADEMIC PRESS INC ELSEVIER SCIENCE	SAN DIEGO	525 B ST, STE 1900, SAN DIEGO, CA 92101-4495 USA	0013-9351	1096-0953		ENVIRON RES	Environ. Res.	JAN 1	2023	216		1
J	Qi, Y; Liu, Y; Qiu, DY; Li, T				Qi, Yue; Liu, Yong; Qiu, Duan-yang; Li, Tian			Effect of biochar particles applied in bedding course of the innovative permeable pavement on enhancing nitrogen removal	WATER SCIENCE AND TECHNOLOGY			English	Article						biochar; capillary column; denitrification; nitrogen removal; permeable pavement	BIORETENTION; PERFORMANCE; REDUCTION; COMMUNITY; SITES	Coconut shell biochar and bamboo biochar were added to the bedding courses of permeable pavements to improve nitrogen removal efficiency. This was expected to be particularly effective for innovative permeable pavements that increase evaporation of stored rainwater. The effects of the rainfall intensity and ambient temperature on nitrogen removal were assessed. The NO3--N removal rate for the pav…	[Qi, Yue; Liu, Yong; Qiu, Duan-yang; Li, Tian] Tongji Univ, State Key Lab Pollut Control & Resource Reuse, Shanghai 200092, Peoples R China	Tongji University	Li, T (corresponding author), Tongji Univ, State Key Lab Pollut Control & Resource Reuse, Shanghai 200092, Peoples R China.	tianli@tongji.edu.cn		Li, Tian/0000-0001-5117-7883; Liu, Yong/0009-0007-8401-5793	National Water Pollution Control and Management Technology Major Project [2017ZX07207001]	National Water Pollution Control and Management Technology Major Project	This research was supported by National Water Pollution Control and Management Technology Major Project (No.2017ZX07207001).		23	3	3	5	26	IWA PUBLISHING	LONDON	REPUBLIC-EXPORT BLDG, UNITS 1 04 & 1 05, 1 CLOVE CRESCENT, LONDON, ENGLAND	0273-1223	1996-9732		WATER SCI TECHNOL	Water Sci. Technol.	OCT 1	2021	84	7
J	Liu, JW; Li, H; Yang, B; Xie, N; Ning, YH				Liu, Jiawen; Li, Hui; Yang, Bing; Xie, Ning; Ning, Yihuan			Laboratory Investigation on Pollutant Removal Effect of Purification Materials for Porous Asphalt Pavement	TRANSPORTATION RESEARCH RECORD			English	Article						infrastructure; pavements; roadway design; hydrology and hydraulics and stormwater; runoff; stormwater quality; sustainable and resilient pavements; sustainable pavements	HEAVY-METALS; FILTRATION CHARACTERISTICS; RUNOFF; CONCRETE	Purification materials have been widely applied as filter media in best management measures including wetlands, bioretention systems, and so forth, whereas their application in permeable pavement is limited and needs further research. This paper aims to explore the feasible applications of water purification materials in permeable pavement materials and structures. Based on laboratory rainfall te…	[Liu, Jiawen; Li, Hui; Yang, Bing; Xie, Ning; Ning, Yihuan] Tongji Univ, Coll Transportat Engn, Minist Educ, Key Lab Rd & Traff Engn, Shanghai, Peoples R China	Tongji University	Li, H (corresponding author), Tongji Univ, Coll Transportat Engn, Minist Educ, Key Lab Rd & Traff Engn, Shanghai, Peoples R China.	hli@tongji.edu.cn	Li, Hui/J-4596-2014	Li, Hui/0000-0001-7115-1373	Fundamental Research Funds for the Central Universities of China [22120220177]; Open Fund of Jiangsu Industrialization Engineering Research Center of Ecological Road Technology, China [GCZX2101]	Fundamental Research Funds for the Central Universities of China(Fundamental Research Funds for the Central Universities); Open Fund of Jiangsu Industrialization Engineering Research Center of Ecological Road Technology, China	The author(s) disclosed receipt of the following financial support for the research, authorship, and/or publication of this article: The research was supported by grants from the Fundamental Research Funds for the Central Universities of China (No.22120220177), and Open Fund of Jiangsu Industrialization Engineering Research Center of Ecological Road Technology, China(No.GCZX2101).		38	2	2	4	25	SAGE PUBLICATIONS INC	THOUSAND OAKS	2455 TELLER RD, THOUSAND OAKS, CA 91320 USA	0361-1981	2169-4052		TRANSPORT RES REC	Transp. Res. Record	SEP	2022	2676	9
J	Huang, S; Garg, A; Mei, GX; Huang, DS; Chandra, RB; Sadasiv, SG				Huang, Shan; Garg, Ankit; Mei, Guoxiong; Huang, Disheng; Chandra, Rahul Balaji; Sadasiv, Shaji Gayathri			Experimental study on the hydrological performance of green roofs in the application of novel biochar	HYDROLOGICAL PROCESSES			English	Article						biochar; detention; green roof; retention; runoff; vegetation	SOIL-WATER RETENTION; HYDRAULIC CONDUCTIVITY; STORMWATER RUNOFF; GAS-PERMEABILITY; AMENDED CLAY; SUBSTRATE; IMPACT; INFILTRATION; VEGETATION; CRACKING	Biochar has the potential to be a soil amendment in green roofs owing to its water retention, nutrient supply, and carbon sequestration application. The combined effects of biochar and vegetated soil on hydraulic performance (e.g., saturated hydraulic conductivity, retention and detention, and runoff delay) are the crucial factor for the application of the novel biochar in green roofs. Recent stu…	[Huang, Shan; Garg, Ankit; Mei, Guoxiong; Huang, Disheng] Guangxi Univ, Coll Civil Engn & Architecture, Nanning 530004, Peoples R China; [Huang, Shan; Garg, Ankit; Mei, Guoxiong; Huang, Disheng] Guangxi Univ, Key Lab Disaster Prevent & Struct Safety, Minist Educ, Nanning, Peoples R China; [Huang, Shan; Garg, Ankit; Mei, Guoxiong; Huang, Disheng] Guangxi Univ, Guangxi Key Lab Disaster Prevent & St…	Guangxi University; Guangxi University; Guangxi University; Indian Institute of Technology System (IIT System); Indian Institute of Technology (IIT) - Bhubaneswar	Mei, GX (corresponding author), Guangxi Univ, Coll Civil Engn & Architecture, Nanning 530004, Peoples R China.	meiguox@163.com	garg, ankit/AAH-9210-2019	garg, ankit/0000-0001-5377-8519; Huang, Shan/0000-0002-6122-6527	Bagui Scholars Program [2016A31]; Innovative Research Team Program of Guangxi Natural Science Foundation [2016GXNSFGA380008]; National Natural Science Foundation of China [41672296, 41867034, 51878185]	Bagui Scholars Program; Innovative Research Team Program of Guangxi Natural Science Foundation; National Natural Science Foundation of China(National Natural Science Foundation of China (NSFC))	Bagui Scholars Program, Grant/Award Number: 2016A31; Innovative Research Team Program of Guangxi Natural Science Foundation, Grant/Award Number: 2016GXNSFGA380008; National Natural Science Foundation of China, Grant/Award Numbers: 41672296, 41867034, 51878185		67	16	16	9	60	WILEY	HOBOKEN	111 RIVER ST, HOBOKEN 07030-5774, NJ USA	0885-6087	1099-1085		HYDROL PROCESS	Hydrol. Process.	NOV 15	2020	34	23
J	Cruz, MA; Xu, JQ; Foppen, JW; Perez, S; Vazquez-Sune, E; Teixido, M				Cruz, Maria Alejandra; Xu, Jiaqi; Foppen, Jan Willem; Perez, Sandra; Vazquez-Sune, Enric; Teixido, Marc			Transport and removal of stormwater vehicle-related mobile organic contaminants in geomedia-amended sand columns	SCIENCE OF THE TOTAL ENVIRONMENT			English	Article						Stormwater treatment; PMT; Nonequilibrium transport; Fouling; Pyrogenic carbonaceous materials	ACTIVATED CARBON; SORPTION; BIOCHAR; RETENTION; GROUNDWATER; SUBSTANCES; ADSORPTION; POLLUTANTS; BIOFILTERS; ATRAZINE	Green infrastructure drainage systems are innovative treatment units that capture and treat stormwater. Unfortunately, highly polar contaminants remain challenging to remove in conventional biofilters. To overcome treatment limitations, we assessed the transport and removal of stormwater vehicle-related organic contaminants with persistent, mobile, and toxic (in short: PMTs) properties, such as 1…	[Cruz, Maria Alejandra; Xu, Jiaqi; Vazquez-Sune, Enric; Teixido, Marc] Inst Environm Assessment & Water Res IDAEA, Severo Ochoa Excellence, Dept Geosci, Jordi Girona 18-26, Barcelona 08034, Spain; [Perez, Sandra] Inst Environm Assessment & Water Res IDAEA, Dept Environm Chem, Severo Ochoa Excellence, Jordi Girona 18-26, Barcelona 08034, Spain; [Cruz, Maria Alejandra; Foppen, Jan Willem] IHE Delft…	Consejo Superior de Investigaciones Cientificas (CSIC); CSIC - Centro de Investigacion y Desarrollo Pascual Vila (CID-CSIC); CSIC - Instituto de Diagnostico Ambiental y Estudios del Agua (IDAEA); Consejo Superior de Investigaciones Cientificas (CSIC); CSIC - Centro de Investigacion y Desarrollo Pascual Vila (CID-CSIC); CSIC - Instituto de Diagnostico Ambiental y Estudios del Agua (IDAEA); IHE Del…	Teixido, M (corresponding author), Inst Environm Assessment & Water Res IDAEA, Severo Ochoa Excellence, Dept Geosci, Jordi Girona 18-26, Barcelona 08034, Spain.	marc.teixido@idaea.csic.es	Vazquez-Suñe, Enric/G-2501-2016	Vazquez-Suñe, Enric/0000-0001-7022-2192; Teixido Planes, Marc/0000-0002-1225-8047; Foppen, Jan Willem/0000-0002-1112-2383	European Commission; IHE-Delft Institute; Ministry of Science and Innovation for her FPI grant [PRE2021-099072]; Beatriu de Pinos fellowship - Agency for Management of University and Research Grants (AGAUR) [2020BP00280]; MCIN/AEI [CEX2018-000794-S]	European Commission(European Union (EU)European Commission Joint Research Centre); IHE-Delft Institute; Ministry of Science and Innovation for her FPI grant; Beatriu de Pinos fellowship - Agency for Management of University and Research Grants (AGAUR); MCIN/AEI	The present research was conducted at the Institute of Environmental Assessment and Water Research (IDAEA) from the Spanish National Re-search Council (CSIC) in Barcelona, Spain. MAC thanks the 'EU Erasmus+ Programme by the European Commission for her scholarship to pursue EMJMD in Groundwater and Global Change-Impacts and Adaptation and IHE-Delft Institute for an advanced class fellowship. JX th…		59	0	0	3	3	ELSEVIER	AMSTERDAM	RADARWEG 29, 1043 NX AMSTERDAM, NETHERLANDS	0048-9697	1879-1026		SCI TOTAL ENVIRON	Sci. Total Environ.	SEP 20	2023	892
J	Akpinar, D; Tian, J; Shepherd, E; Imhoff, PT				Akpinar, Derya; Tian, Jing; Shepherd, Elizabeth; Imhoff, Paul T.			Impact of wood-derived biochar on the hydrologic performance of bioretention media: Effects on aggregation, root growth, and water retention	JOURNAL OF ENVIRONMENTAL MANAGEMENT			English	Article						Bioretention soil media; Stormwater management; Biochar; Hydraulic conductivity; Water retention; Aggregation	ORGANIC-MATTER; POLLUTANT REMOVAL; HYDRAULIC CONDUCTIVITY; SOIL-STRUCTURE; PARTICLE-SIZE; CARBON; STORMWATER; INFILTRATION; MECHANISMS; STABILITY	Bioretention systems are one example of green stormwater infrastructure that may mitigate the hydrologic impact of stormwater runoff. To improve water retention while maintaining rapid stormwater infiltration, conventional bioretention soil media (BSM) might be augmented with biochar. Biochar may improve the BSM's structure by increasing soil aggregation, which might improve water retention and i…	[Akpinar, Derya; Shepherd, Elizabeth; Imhoff, Paul T.] Univ Delaware, Dept Civil & Environm Engn, Newark, DE 19716 USA; [Tian, Jing] Sichuan Normal Univ, Coll Chem & Mat Sci, Chengdu 610066, Peoples R China	University of Delaware; Sichuan Normal University	Imhoff, PT (corresponding author), Univ Delaware, Dept Civil & Environm Engn, Newark, DE 19716 USA.	imhoff@udel.edu		Akpinar, Derya/0000-0001-6121-676X	Delaware Department of Transportation (DelDOT)	Delaware Department of Transportation (DelDOT)	This work was supported by the Delaware Department of Transportation (DelDOT) . The authors extend thanks to Dr. Ali Nakhli for conceptualizing the methodology for aggregation analysis and technical support in the laboratory.		91	0	0	13	13	ACADEMIC PRESS LTD- ELSEVIER SCIENCE LTD	LONDON	24-28 OVAL RD, LONDON NW1 7DX, ENGLAND	0301-4797	1095-8630		J ENVIRON MANAGE	J. Environ. Manage.	AUG 1	2023	339
J	Ofori-Boadu, AN; Bryant, D; Bock-Hyeng, C; Assefa, Z; Aryeetey, F; Munkaila, S; Fini, E				Ofori-Boadu, Andrea Nana; Bryant, DeAndria; Bock-Hyeng, Christian; Assefa, Zerihun; Aryeetey, Frederick; Munkaila, Samira; Fini, Elham			Physiochemical characterization of agricultural waste biochars for partial cement replacement	INTERNATIONAL JOURNAL OF BUILDING PATHOLOGY AND ADAPTATION			English	Article						Concrete; Compression strength; Setting; Water absorption; Sustainable; Construction; Accelerator; Admixture; Additive; Biomass	RICE HUSK ASH; STRENGTH DEVELOPMENT; BIOMASS; HYDRATION; CYCLOALKYNES; COMPOSITES; REMOVAL; ALKYNES; SILICA; SALTS	Purpose The purpose of this study is to explore the feasibility of utilizing agricultural (almond shell, rice husk and wood) waste biochars for partial cement replacement by evaluating the relationships between the physiochemical properties of biochars and the early-age characteristics of cement pastes. Design/methodology/approach Biochars are prepared through the thermal decomposition of biomass…	[Ofori-Boadu, Andrea Nana; Bryant, DeAndria; Bock-Hyeng, Christian] North Carolina Agr & Tech State Univ, Dept Built Environm, Greensboro, NC 27411 USA; [Bock-Hyeng, Christian] Yaounde Univ Cameroon, Natl High Sch Polytech, Dept Civil Engn & Urban Dev, Yaounde, Cameroon; [Assefa, Zerihun; Munkaila, Samira] North Carolina Agr & Tech State Univ, Chem, Greensboro, NC USA; [Aryeetey, Frederick] North…	University of North Carolina; North Carolina A&T State University; University of North Carolina; North Carolina A&T State University; University of North Carolina; North Carolina A&T State University; Arizona State University; Arizona State University-Tempe	Ofori-Boadu, AN (corresponding author), North Carolina Agr & Tech State Univ, Dept Built Environm, Greensboro, NC 27411 USA.	andreao@ncat.edu		Ofori-Boadu, Andrea/0000-0001-6401-1399					86	1	1	0	17	EMERALD GROUP PUBLISHING LTD	BINGLEY	HOWARD HOUSE, WAGON LANE, BINGLEY BD16 1WA, W YORKSHIRE, ENGLAND	2398-4708			INT J BUILD PATHOL	Int. J. Build. Pathol. Adapt.	DEC 6	2022	40	4
J	Athira, VS; Charitha, V; Athira, G; Bahurudeen, A				Athira, V. S.; Charitha, V; Athira, G.; Bahurudeen, A.			Agro-waste ash based alkali-activated binder: Cleaner production of zero cement concrete for construction	JOURNAL OF CLEANER PRODUCTION			English	Review						Alkali activated binder; Agro waste; Precursor; Durability; Concrete; Biochar	OIL FUEL ASH; RICE-HUSK ASH; BLAST-FURNACE SLAG; CANE BAGASSE ASH; WHEAT-STRAW ASH; FLY-ASH; GEOPOLYMER CONCRETE; DURABILITY PROPERTIES; MECHANICAL-PROPERTIES; COMPRESSIVE STRENGTH	Alkali-activated binders are sustainable alternatives to carbon-intensive conventional cements. A comprehensive review of the potential of different agro-waste ashes and their performance as precursors in alkali-activated binders are essential to enable their acceptance in the construction sector. Hence, the present study focusses on a systematic review of the alkali-activation of bagasse ash, ri…	[Athira, V. S.; Charitha, V; Athira, G.; Bahurudeen, A.] Birla Inst Technol & Sci Pilani, Dept Civil Engn, Hyderabad Campus, Hyderabad, India	Birla Institute of Technology & Science Pilani (BITS Pilani)	Bahurudeen, A (corresponding author), Birla Inst Technol & Sci Pilani, Hyderabad Campus, Hyderabad 500078, India.	bahur@hyderabad.bits-pilani.ac.in	Cuadrado, Glenda/HNJ-6380-2023	Gopinath, Athira/0000-0001-6746-3198; A, Bahurudeen/0000-0002-8300-2321					104	28	28	14	71	ELSEVIER SCI LTD	OXFORD	THE BOULEVARD, LANGFORD LANE, KIDLINGTON, OXFORD OX5 1GB, OXON, ENGLAND	0959-6526	1879-1786		J CLEAN PROD	J. Clean Prod.	MAR 1	2021	286
J	Tan, KH; Wang, TY; Zhou, ZH; Qin, YH				Tan, Kang-Hao; Wang, Tian-Yu; Zhou, Zu-Heng; Qin, Ying-Hong			Biochar as a Partial Cement Replacement Material for Developing Sustainable Concrete: An Overview	JOURNAL OF MATERIALS IN CIVIL ENGINEERING			English	Review						Biochar; Cementitious material properties; Alternative cement; CO2 sequestration	RICE HUSK ASH; DEPENDENT THERMAL-CONDUCTIVITY; ATMOSPHERIC CARBON-DIOXIDE; FLY-ASH; PHYSICAL-PROPERTIES; ACTIVATED CARBON; MICROSTRUCTURAL EVOLUTION; SLOW PYROLYSIS; HYDRATION; TEMPERATURE	Biochar (BC) is a porous carbon formed by pyrolysis of biomass at high temperatures under anoxic conditions. The use of pulverized BC as a cementitious materials mixture has recently gained research momentum because this usage can lock BC in inert materials and reduce cement consumption simultaneously. This paper presents a review on the use BC particles as an additive or cement replacement in ce…	[Tan, Kang-Hao; Wang, Tian-Yu; Zhou, Zu-Heng; Qin, Ying-Hong] Guangxi Univ, Coll Civil Engn & Architecture, 100 Univ Rd, Nanning 530004, Peoples R China; [Qin, Ying-Hong] Minist Educ, Key Lab Disaster Prevent & Struct Safety, Nanning 530004, Peoples R China	Guangxi University	Qin, YH (corresponding author), Guangxi Univ, Coll Civil Engn & Architecture, 100 Univ Rd, Nanning 530004, Peoples R China.;Qin, YH (corresponding author), Minist Educ, Key Lab Disaster Prevent & Struct Safety, Nanning 530004, Peoples R China.	haokangtan@163.com; tywang@163.com; 477696504@qq.com; yqin1@mtu.edu	kanghao, Tan/GNM-9884-2022	Wang, Tianyu/0000-0001-8738-2766	high-level innovation team and outstanding scholar program in Guangxi colleges; National Natural Science Foundation of China [41561015, 51678164]; Innovation Project of Guangxi Graduate Education [YCBZ2021022]	high-level innovation team and outstanding scholar program in Guangxi colleges; National Natural Science Foundation of China(National Natural Science Foundation of China (NSFC)); Innovation Project of Guangxi Graduate Education	This work is jointly supported by the high-level innovation team and outstanding scholar program in Guangxi colleges (granted to Dr. Yinghong Qin), the National Natural Science Foundation of China (Nos. 41561015 and 51678164), and Innovation Project of Guangxi Graduate Education (YCBZ2021022).		92	11	11	13	61	ASCE-AMER SOC CIVIL ENGINEERS	RESTON	1801 ALEXANDER BELL DR, RESTON, VA 20191-4400 USA	0899-1561	1943-5533		J MATER CIVIL ENG	J. Mater. Civ. Eng.	DEC 1	2021	33	12
J	Sang, M; Huang, MS; Zhang, W; Che, W; Sun, HC				Sang, Min; Huang, Miansong; Zhang, Wei; Che, Wu; Sun, Huichao			A pilot bioretention system with commercial activated carbon and river sediment-derived biochar for enhanced nutrient removal from stormwater	WATER SCIENCE AND TECHNOLOGY			English	Article						activated carbon; biochar; bioretention; nutrient	HYDROPHOBIC ORGANIC CONTAMINANTS; NITROGEN-RETENTION; POLLUTANT REMOVAL; WASTE MATERIALS; SORPTION; ADSORPTION; MEDIA; PHOSPHATE; AMENDMENT; RUNOFF	Bioretention is an effective technology for urban stormwater management, but the nutrient removal in conventional bioretention systems is highly variable. Thus, a pilot bioretention column experiment was performed to evaluate the nutrient control of systems with commercial activated carbon and river sediment-derived biochar. Significant chemical oxygen demand (COD) and total phosphorus (TP) leach…	[Sang, Min; Zhang, Wei; Che, Wu; Sun, Huichao] Beijing Univ Civil Engn & Architecture, Beijing Engn Res Ctr Sustainable Urban Sewage Sys, Beijing 100044, Peoples R China; [Huang, Miansong] Ningxia Capital Sponge City Construct & Dev Co Lt, Guyuan 756000, Peoples R China; [Zhang, Wei; Che, Wu] Beijing Univ Civil Engn & Architecture, Key Lab Urban Stormwater Syst & Water Environm, Minist Educ, Beij…	Beijing University of Civil Engineering & Architecture; Beijing University of Civil Engineering & Architecture	Zhang, W (corresponding author), Beijing Univ Civil Engn & Architecture, Beijing Engn Res Ctr Sustainable Urban Sewage Sys, Beijing 100044, Peoples R China.	zhangwei@bucea.edu.cn		Zhang, Wei/0000-0002-0527-4006; Che, Wenquan/0000-0002-9388-6570	National Natural Science Foundation of China [51608026]; Scientific Research Project of Beijing Educational Committee [KM201910016012]; Beijing Advanced Innovation Center for Future Urban Design Projects [UDC2016040100]; Research Program for Key Technologies of Sponge City Construction and Management in Guyuan City [SCHM-2018]	National Natural Science Foundation of China(National Natural Science Foundation of China (NSFC)); Scientific Research Project of Beijing Educational Committee; Beijing Advanced Innovation Center for Future Urban Design Projects; Research Program for Key Technologies of Sponge City Construction and Management in Guyuan City	This study was financially supported by the National Natural Science Foundation of China (No. 51608026), the Scientific Research Project of Beijing Educational Committee (No. KM201910016012), Beijing Advanced Innovation Center for Future Urban Design Projects (No. UDC2016040100) and the Research Program for Key Technologies of Sponge City Construction and Management in Guyuan City (No. SCHM-2018)…		48	16	16	7	80	IWA PUBLISHING	LONDON	REPUBLIC-EXPORT BLDG, UNITS 1 04 & 1 05, 1 CLOVE CRESCENT, LONDON, ENGLAND	0273-1223	1996-9732		WATER SCI TECHNOL	Water Sci. Technol.	AUG 15	2019	80	4
J	Tan, KH; Qin, YH; Wang, JS				Tan, Kanghao; Qin, Yinghong; Wang, Junsong			Evaluation of the properties and carbon sequestration potential of biochar-modified pervious concrete	CONSTRUCTION AND BUILDING MATERIALS			English	Article						Pervious concrete; Biochar; Carbon sequestration; Strength; Evaporative cooling effect	DEPENDENT THERMAL-CONDUCTIVITY; FILLER; DIOXIDE; BIOMASS; IMPACT; WASTE	Adding biochar (BC) into cementitious materials to replace partial cement is a win-win strategy for both cement output reduction and hygrothermal properties improvement of cement-based composites. However, how to coordinate the different functions to achieve the optimized performance of BC-modified pervious concrete remains scarcely reported. This study is aim to explore the influence mechanism o…	[Tan, Kanghao; Qin, Yinghong] Guangxi Univ, Coll Civil Engn & Architecture, 100 Univ Rd, Nanning 530004, Guangxi, Peoples R China; [Tan, Kanghao; Wang, Junsong] South China Univ Technol, Sch Architecture, State Key Lab Subtrop Bldg Sci, Guangzhou 510641, Guangdong, Peoples R China	Guangxi University; South China University of Technology	Wang, JS (corresponding author), South China Univ Technol, Sch Architecture, State Key Lab Subtrop Bldg Sci, Guangzhou 510641, Guangdong, Peoples R China.	arwjs@mail.scut.edu.cn	kanghao, Tan/GNM-9884-2022; Wang, Junsong/GNH-4461-2022	Wang, Junsong/0000-0002-2401-5771	National Natural Science Foundation of China [52008173, 51678243, 51878287, 41561015]; outstanding scholar program and high-level innovation team in Guangxi colleges; Innovation Project of Guangxi Graduate Education China [YCBZ2021022]; State Key Lab of Subtropical Building Science, South China University of Technology [2021ZB20]; China Postdoctoral Science Foundation [2020M682706]; Guangdong Nat…	National Natural Science Foundation of China(National Natural Science Foundation of China (NSFC)); outstanding scholar program and high-level innovation team in Guangxi colleges; Innovation Project of Guangxi Graduate Education China; State Key Lab of Subtropical Building Science, South China University of Technology; China Postdoctoral Science Foundation(China Postdoctoral Science Foundation); G…	This work is jointly supported by the National Natural Science Foundation of China (Nos. 52008173, 51678243, 51878287, 41561015), the outstanding scholar program and high-level innovation team in Guangxi colleges (granted to Dr. Yinghong Qin), and Innovation Project of Guangxi Graduate Education China (No. YCBZ2021022), the Guangdong Natural Science Foundation (No. 2018A0303130094), State Key Lab…		50	33	35	15	45	ELSEVIER SCI LTD	OXFORD	THE BOULEVARD, LANGFORD LANE, KIDLINGTON, OXFORD OX5 1GB, OXON, ENGLAND	0950-0618	1879-0526		CONSTR BUILD MATER	Constr. Build. Mater.	JAN 3	2022	314		A
J	Sirico, A; Bernardi, P; Belletti, B; Malcevschi, A; Dalcanale, E; Domenichelli, I; Fornoni, P; Moretti, E				Sirico, Alice; Bernardi, Patrizia; Belletti, Beatrice; Malcevschi, Alessio; Dalcanale, Enrico; Domenichelli, Ilaria; Fornoni, Paolo; Moretti, Emanuele			Mechanical characterization of cement-based materials containing biochar from gasification	CONSTRUCTION AND BUILDING MATERIALS			English	Article						Biochar; Cementitious mortar; Concrete; Waste; Carbon sink; Sustainability; Mechanical properties; Fracture energy; Digital Image Correlation	CONCRETE	This study focuses on the influence of biochar - a solid, porous, carbonaceous material product resulting from biomass gasification of wood waste - on mechanical properties of cement mortars. In order to investigate its effectiveness for structural purposes, biochar is added in cement mortar in increasing percentages, up to 2.5% by weight of cement. Experimental findings show that, by including a…	[Sirico, Alice; Bernardi, Patrizia; Belletti, Beatrice] Univ Parma, Dept Engn & Architecture, Parco Area Sci,181-A, I-43124 Parma, Italy; [Malcevschi, Alessio; Dalcanale, Enrico; Domenichelli, Ilaria] Univ Parma, Dept Chem Life Sci & Environm Sustainabil, Parco Area Sci,11-A, I-43124 Parma, Italy; [Fornoni, Paolo; Moretti, Emanuele] Mapei SpA, Res & Dev, Via Cafiero 22, Milan, Italy	University of Parma; University of Parma	Sirico, A (corresponding author), Univ Parma, Dept Engn & Architecture, Parco Area Sci,181-A, I-43124 Parma, Italy.	alice.sirico@unipr.it	Sirico, Alice/ACF-5554-2022	Sirico, Alice/0000-0001-5897-1641					30	39	39	5	31	ELSEVIER SCI LTD	OXFORD	THE BOULEVARD, LANGFORD LANE, KIDLINGTON, OXFORD OX5 1GB, OXON, ENGLAND	0950-0618	1879-0526		CONSTR BUILD MATER	Constr. Build. Mater.	JUN 20	2020	246
J	Singhal, S				Singhal, Shailey			Biochar as a cost-effective and eco-friendly substitute for binder in concrete: a review	EUROPEAN JOURNAL OF ENVIRONMENTAL AND CIVIL ENGINEERING			English	Review						Biochar; concrete; construction; eco-friendly; green additive	WASTE MARBLE POWDER; ACTIVATED CARBON; LEACHING BEHAVIOR; CO2 ADSORPTION; SILICA FUME; CEMENT; PERFORMANCE; PYROLYSIS; STRENGTH; BIOMASS	Owing to the scarcity of raw materials and environmental concerns, concrete industry demands a suitable environment friendly material, which can substitute it partially while maintaining its required characteristics. Biochar from agricultural biomass is sustainable product for construction uses without any adverse effect on environment. It acts as effective binder/filler for enhancing performance…	[Singhal, Shailey] Univ Petr & Energy Studies UPES, Sch Engn, Dept Chem, Bidholi, Uttarakhand, India	University of Petroleum & Energy Studies (UPES)	Singhal, S (corresponding author), Univ Petr & Energy Studies UPES, Sch Engn, Dept Chem, Energy Acres Bldg, Dehra Dun 248007, Uttarakhand, India.	shailey@ddn.upes.ac.in		Singhal, Shailey/0000-0003-1197-2166					156	1	1	12	29	TAYLOR & FRANCIS LTD	ABINGDON	2-4 PARK SQUARE, MILTON PARK, ABINGDON OR14 4RN, OXON, ENGLAND	1964-8189	2116-7214		EUR J ENVIRON CIV EN	Eur. J. Environ. Civ. Eng.	JAN 25	2023	27	2
J	Wang, Y; Meng, YK; Wang, CY; Wang, B				Wang, Yuan; Meng, Yike; Wang, Chuanyue; Wang, Bao			Ammonium Release and Adsorption Characters of Polyurethane-Biochar Crosslinked Material as an Additive Filler in Stormwater Treatment	POLYMERS			English	Article						polyurethane&#8211; biochar crosslinked material; bioretention system; ammonia nitrogen leaching; ammonium adsorption; stormwater treatment	BIORETENTION SYSTEM; NITROGEN-RETENTION; POLLUTANT REMOVAL; WATER CYCLE; RUNOFF; MEDIA; FILTER; WASTE	The additive fillers in bioretention facilities play a leading role in stormwater treatment to purify polluted runoff. At present, many traditional materials could not meet the requirements at the same time, including low ammonium leaching quantities, high water storage volume and strong ammonium adsorption. This study investigated a polymer material, polyurethane-biochar crosslinked material (PC…	[Wang, Yuan; Meng, Yike; Wang, Chuanyue] Hohai Univ, Coll Civil & Transportat Engn, Nanjing 210098, Peoples R China; [Wang, Yuan] Hohai Univ, Coll Water Conservancy & Hydropower Engn, Nanjing 210098, Peoples R China; [Wang, Bao] China Construct Infrastruct Co Ltd, Beijing 100029, Peoples R China	Hohai University; Hohai University	Wang, Y; Meng, YK (corresponding author), Hohai Univ, Coll Civil & Transportat Engn, Nanjing 210098, Peoples R China.;Wang, Y (corresponding author), Hohai Univ, Coll Water Conservancy & Hydropower Engn, Nanjing 210098, Peoples R China.	wangyuan@hhu.edu.cn; mengyike@hhu.edu.cn; 19860001@hhu.edu.cn; wbqymx@163.com		Meng, Yike/0000-0002-1721-027X	National Natural Science Foundation of China [U1765204, 41772340]; National Key Technologies Research & Development Program [2017YFC1502603]	National Natural Science Foundation of China(National Natural Science Foundation of China (NSFC)); National Key Technologies Research & Development Program(National Key Technology R&D Program)	This research was funded by the National Natural Science Foundation of China, grant numbers U1765204 and 41772340, and National Key Technologies Research & Development Program, grant numbers 2017YFC1502603.		41	2	2	3	38	MDPI	BASEL	ST ALBAN-ANLAGE 66, CH-4052 BASEL, SWITZERLAND		2073-4360		POLYMERS-BASEL	Polymers	MAY	2021	13	10
J	Schmidt, W; Commeh, M; Olonade, K; Schiewer, GL; Dodoo-Arhin, D; Dauda, R; Fataei, S; Tawiah, AT; Mohamed, F; Thiedeitz, M; Radebe, NW; Rogge, A				Schmidt, Wolfram; Commeh, Michael; Olonade, Kolawole; Schiewer, Gesine Lenore; Dodoo-Arhin, David; Dauda, Risikat; Fataei, Shirin; Tawiah, Angela Tetteh; Mohamed, Fatma; Thiedeitz, Mareike; Radebe, Nonkululeko W.; Rogge, Andreas			Sustainable circular value chains: From rural waste to feasible urban construction materials solutions	DEVELOPMENTS IN THE BUILT ENVIRONMENT			English	Article						Sustainability; Circular economy; Urbanisation; Cement; CONCRETE; Vertical shaft kiln; Hydrolysis; Biochar; Polysaccharides; Sub-saharan africa; Africa	RICE HUSK; CEMENT; BIOMASS	Urban regions in sub-Saharan Africa are growing significantly more rapid than their also growing rural counterparts. However, the employment perspectives in rural areas are decreasing, and thus the urban growth can become a driver for enhanced livelihoods in the rural areas. Since urbanisation in Africa requires high amount of concrete, the conversion of agricultural waste materials to sustainabl…	[Schmidt, Wolfram; Rogge, Andreas] Bundesanstalt Mat Forsch & Prufung, D-12205 Berlin, Germany; [Commeh, Michael] Kwame Nkrumah Univ Sci & Technol, Kumasi, Ghana; [Olonade, Kolawole; Dauda, Risikat] Univ Lagos, Akoka 100213, Nigeria; [Schiewer, Gesine Lenore] Univ Bayreuth, D-95440 Bayreuth, Germany; [Dodoo-Arhin, David] Univ Ghana, Legon, Ghana; [Fataei, Shirin] Tech Univ Dresden, D-01187 Dresde…	Federal Institute for Materials Research & Testing; Kwame Nkrumah University Science & Technology; University of Lagos; University of Bayreuth; University of Ghana; Technische Universitat Dresden; University of Dar es Salaam; Technical University of Munich; Helmholtz Association; Karlsruhe Institute of Technology	Schmidt, W (corresponding author), Bundesanstalt Mat Forsch & Prufung, D-12205 Berlin, Germany.	wolfram.schmidt@bam.de	Tawiah, Angela Tetteh/HPC-3362-2023; Schmidt, Wolfram/N-2603-2015; Rogge, Andreas/HMV-6065-2023	Schmidt, Wolfram/0000-0002-0528-4079; Thiedeitz, Mareike/0000-0002-6530-1651	Federal Ministry of Education and Research in the schemes CLIENT II	Federal Ministry of Education and Research in the schemes CLIENT II	Parts of the presented works on kiln processes and cassava peel processing have been developed within the projects INFRACOST and LocalCare, respectively. The authors highly appreciate the funding provided by the Federal Ministry of Education and Research in the schemes CLIENT II and GAIIA.		63	14	14	4	20	ELSEVIER	AMSTERDAM	RADARWEG 29, 1043 NX AMSTERDAM, NETHERLANDS		2666-1659		DEV BUILT ENVIRON	Dev. Built Environ.	MAY	2021	6
J	Sirico, A; Bernardi, P; Sciancalepore, C; Vecchi, F; Malcevschi, A; Belletti, B; Milanese, D				Sirico, Alice; Bernardi, Patrizia; Sciancalepore, Corrado; Vecchi, Francesca; Malcevschi, Alessio; Belletti, Beatrice; Milanese, Daniel			Biochar from wood waste as additive for structural concrete	CONSTRUCTION AND BUILDING MATERIALS			English	Article						Waste; Circular materials; Biochar; Filler; Concrete; Mechanical characterization; Carbon sink; Sustainability	CEMENT MORTAR; CARBON; BIOMASS; COMPOSITES; IMPROVEMENT; AGGREGATE; EMISSIONS; FILLER	The environmental impacts of cement and concrete industries are increasingly taken into consideration by regulatory agencies and new solutions must be found to turn into more sustainable productions. The use of waste materials as partial replacement of cement and/or aggregates or also as fillers into cement-based admixtures is a possible way to reduce the related negative impacts, such as carbon …	[Sirico, Alice; Bernardi, Patrizia; Sciancalepore, Corrado; Vecchi, Francesca; Belletti, Beatrice; Milanese, Daniel] Univ Parma, Dept Engn & Architecture, Parco Area Sci 181-A, I-43124 Parma, Italy; [Malcevschi, Alessio] Univ Parma, Dept Chem Life Sci & Environm Sustainabil, Parco Area Sci 11-A, I-43124 Parma, Italy; [Sciancalepore, Corrado; Milanese, Daniel] Natl Interuniv Consortium Mat Sci & T…	University of Parma; University of Parma	Bernardi, P (corresponding author), Univ Parma, Dept Engn & Architecture, Parco Area Sci 181-A, I-43124 Parma, Italy.	patrizia.bernardi@unipr.it	Sirico, Alice/ACF-5554-2022	Sirico, Alice/0000-0001-5897-1641	Emilia Romagna Region (Italy) [PG/2018/632099]	Emilia Romagna Region (Italy)(Regione Emilia Romagna)	This work was financially supported by Emilia Romagna Region (Italy) in the framework of 2014/20 POR-FESR project IMPReSAbetonplast: Development of innovative construction materials including non-recyclable plastic particles acting as reinforcement, grant number PG/2018/632099. Authors gratefully acknowledge Mapei SpA for the precious advices in the mix design formulation, as well as Cementirossi…		62	17	18	8	45	ELSEVIER SCI LTD	OXFORD	THE BOULEVARD, LANGFORD LANE, KIDLINGTON, OXFORD OX5 1GB, OXON, ENGLAND	0950-0618	1879-0526		CONSTR BUILD MATER	Constr. Build. Mater.	OCT 11	2021	303
J	Spahr, S; Teixido, M; Gall, SS; Pritchard, JC; Hagemann, N; Helmreich, B; Luthy, RG				Spahr, Stephanie; Teixido, Marc; Gall, Sarah S.; Pritchard, James C.; Hagemann, Nikolas; Helmreich, Brigitte; Luthy, Richard G.			Performance of biochars for the elimination of trace organic contaminants and metals from urban stormwater	ENVIRONMENTAL SCIENCE-WATER RESEARCH & TECHNOLOGY			English	Article							ACTIVATED CARBON; ADSORPTION; WATER; REMOVAL; MICROPOLLUTANTS; BIOFILTERS; SOIL; INFRASTRUCTURE; IONS	Urban stormwater carries dissolved organic and metal contaminants that pose risks to water supplies and the environment. Green infrastructure elements such as biofilters have the potential to capture and treat urban stormwater prior to infiltration to groundwater. Because conventional sand-based biofilters often fail to eliminate dissolved contaminants from stormwater, there is a need to improve …	[Spahr, Stephanie; Gall, Sarah S.; Pritchard, James C.; Luthy, Richard G.] Stanford Univ, Dept Civil & Environm Engn, Stanford, CA 94305 USA; [Spahr, Stephanie; Teixido, Marc; Gall, Sarah S.; Pritchard, James C.; Luthy, Richard G.] Re Inventing Nations Urban Water Infrastruct ReNU, NSF Engn Res Ctr, Stanford, CA 94305 USA; [Spahr, Stephanie] Leibniz Inst Freshwater Ecol & Inland Fisheries I, Dept…	Stanford University; National Science Foundation (NSF); NSF - Engineering Research Centers (ERC); Leibniz Institut fur Gewasserokologie und Binnenfischerei (IGB); University of California System; University of California Berkeley; Consejo Superior de Investigaciones Cientificas (CSIC); CSIC - Centro de Investigacion y Desarrollo Pascual Vila (CID-CSIC); CSIC - Instituto de Diagnostico Ambiental y…	Spahr, S; Luthy, RG (corresponding author), Stanford Univ, Dept Civil & Environm Engn, Stanford, CA 94305 USA.;Spahr, S; Luthy, RG (corresponding author), Re Inventing Nations Urban Water Infrastruct ReNU, NSF Engn Res Ctr, Stanford, CA 94305 USA.;Spahr, S (corresponding author), Leibniz Inst Freshwater Ecol & Inland Fisheries I, Dept Ecohydrol & Biogeochem, Berlin, Germany.	stephanie.spahr@igb-berlin.de; luthy@stanford.edu	Pritchard, James Conrad/CAF-7351-2022; Spahr, Stephanie/AAF-1490-2019; Helmreich, Brigitte/O-4862-2015	Spahr, Stephanie/0000-0002-3004-3162; Hagemann, Nikolas/0000-0001-8005-9392; Luthy, Richard/0000-0003-0274-0240; Helmreich, Brigitte/0000-0003-4224-3329; Gall, Sarah/0000-0003-4676-4519; Teixido Planes, Marc/0000-0002-1225-8047	National Science Foundation Engineering Research Center for Re-inventing the Nation's Urban Water Infrastructure [NSF ERC ReNUWIt 1028968]; UPS Foundation Grant at Stanford University; US Department of Defense Strategic Environmental Research and Development Program [ER18-1145]	National Science Foundation Engineering Research Center for Re-inventing the Nation's Urban Water Infrastructure; UPS Foundation Grant at Stanford University; US Department of Defense Strategic Environmental Research and Development Program(United States Department of Defense)	This research was supported by the National Science Foundation Engineering Research Center for Re-inventing the Nation's Urban Water Infrastructure (NSF ERC ReNUWIt 1028968), the UPS Foundation Grant at Stanford University, and the US Department of Defense Strategic Environmental Research and Development Program (ER18-1145). We thank the Stanford Environmental Measurements Facility for training a…		53	3	3	8	35	ROYAL SOC CHEMISTRY	CAMBRIDGE	THOMAS GRAHAM HOUSE, SCIENCE PARK, MILTON RD, CAMBRIDGE CB4 0WF, CAMBS, ENGLAND	2053-1400	2053-1419		ENVIRON SCI-WAT RES	Environ. Sci.-Wat. Res. Technol.	JUN 6	2022	8	6
J	Licht, J; Smith, NG				Licht, Jeff; Smith, Nicholas G.			Pyrogenic carbon improves the physiological performance of a C-3 species planted on a green roof	ISRAEL JOURNAL OF ECOLOGY & EVOLUTION			English	Article						PyC; wild indigo; green roof; water use efficiency; ecology; Baptisia; waste stream; cardboard	WATER-USE EFFICIENCY; VEGETABLE PRODUCTION; BIOCHAR APPLICATION; PHYSICAL QUALITY; ORGANIC-MATTER; SOIL; RETENTION; AMENDMENT; IMPACT; GROWTH	Plants utilizing C-3 physiology have a more difficult time establishing in rooftop environments than plants with more heat and drought adapted constitutions, such as species that employ crassulacean acid metabolism (CAM). CAM species are much less susceptible to limitations of shallow, infertile soil-less media under abiotic and biotic stress. It is thought that soil amendments might improve roof…	[Licht, Jeff] Univ Massachusetts, Sch Environm, Dorchester, MA 02110 USA; [Smith, Nicholas G.] Texas Tech Univ, Dept Biol Sci, Lubbock, TX 79409 USA	University of Massachusetts System; Texas Tech University System; Texas Tech University	Licht, J (corresponding author), Univ Massachusetts, Sch Environm, Dorchester, MA 02110 USA.	jefflicht64@gmail.com	Licht, Jeff/AGM-3879-2022; Smith, Nick/HTO-1259-2023; Smith, Nicholas/B-7126-2015	Smith, Nicholas/0000-0001-7048-4387	Sullivan Farm in Sullivan New Hampshire USA; Texas Tech University	Sullivan Farm in Sullivan New Hampshire USA; Texas Tech University	Conversion of hemicellulose feedstock (old corrugated cardboard) used in this study occurred at the Sullivan Farm in Sullivan New Hampshire USA. NGS acknowledges support from Texas Tech University.		44	0	0	0	11	BRILL	LEIDEN	PLANTIJNSTRAAT 2, P O BOX 9000, 2300 PA LEIDEN, NETHERLANDS	1565-9801	2224-4662		ISR J ECOL EVOL	Isr. J. Ecol. Evol.	FEB	2021	67	1-2
C	Cosentino, I; Restuccia, L; Ferro, GA; Tulliani, JM		Sedmak, A; Radakovic, Z; Rakin, M		Cosentino, Isabella; Restuccia, Luciana; Ferro, Giuseppe Andrea; Tulliani, Jean-Marc			Influence of pyrolysis parameters on the efficiency of the biochar as nanoparticles into cement-based composites	ECF22 - LOADING AND ENVIRONMENTAL EFFECTS ON STRUCTURAL INTEGRITY	Procedia Structural Integrity		English	Proceedings Paper	22nd European Conference on Fracture (ECF) - Loading and Environmental Effects on Structural Integrity	AUG 26-31, 2018	Belgrade, SERBIA	European Struct Integr Soc,Soc Struct Integr & Life		pyrolysi; biochar; cement-based composites; carbon nanoparticles; mechanical properties; flexural strength; fracture energy		In this research, a particular kind of biochar provided by UK Biochar Centre has been added as nanoparticles into cementitious composites. Its principle characteristic lies in the standardization of its process production, that makes it suitable to been used as filler in cement-matrix composites, ensuring the reproducibility of the cement mix (I. Cosentino The use of Bio-char for sustainable and …	[Cosentino, Isabella; Restuccia, Luciana; Ferro, Giuseppe Andrea] DISEG Politecn Torino, Cso Duca Abruzzi 24, I-10129 Turin, Italy; [Tulliani, Jean-Marc] DISAT Politecn Torino, Cso Duca Abruzzi 24, I-10129 Turin, Italy	Polytechnic University of Turin; Polytechnic University of Turin	Ferro, GA (corresponding author), DISEG Politecn Torino, Cso Duca Abruzzi 24, I-10129 Turin, Italy.	ferro@polito.it	RESTUCCIA, LUCIANA/AAG-6761-2019; FERRO, GIUSEPPE ANDREA/F-8300-2018	RESTUCCIA, LUCIANA/0000-0002-6999-0466; FERRO, GIUSEPPE ANDREA/0000-0002-0622-4203					8	12	13	0	7	ELSEVIER SCIENCE BV	AMSTERDAM	SARA BURGERHARTSTRAAT 25, PO BOX 211, 1000 AE AMSTERDAM, NETHERLANDS	2452-3216			PROCEDIA STRUCT INTE			2018	13
J	Chen, TF; Zhao, LY; Gao, XJ; Li, LS; Qin, L				Chen, Tiefeng; Zhao, Liying; Gao, Xiaojian; Li, Linshan; Qin, Ling			Modification of carbonation-cured cement mortar using biochar and its environmental evaluation	CEMENT & CONCRETE COMPOSITES			English	Article						Carbonation curing; Biochar; Cement -based materials; Performance improvement; Environmental evaluation	LIFE-CYCLE ASSESSMENT; CHEMICAL-COMPOSITION; STRENGTH; DURABILITY; CONCRETE; WASTE; MICROSTRUCTURE; SOLUBILITY; SYSTEMS	Despite being considered as a potential carbon capture method, carbonation curing of cement-based materials are still accompanied by serious concerns now. Strength loss and shrinkage can be induced by pre-conditioning and excessive carbonation exposure; Difficulty of inward diffusion of CO2 leads to relatively low total carbon-ation degree. In this work, biochar prepared from corn straw at variou…	[Chen, Tiefeng; Zhao, Liying; Gao, Xiaojian; Li, Linshan; Qin, Ling] Harbin Inst Technol, Sch Civil Engn, Harbin 150090, Peoples R China; [Gao, Xiaojian] Zhengzhou Univ, Sch Mat Sci & Engn, Zhengzhou 450001, Peoples R China; [Qin, Ling] Qingdao Univ Technol, Sch Civil Engn, Qingdao 266000, Peoples R China; [Gao, Xiaojian] Harbin Inst Technol, Sch Civil Engn, 73 Huanghe Rd,Nangang Dist, Harbin 150…	Harbin Institute of Technology; Zhengzhou University; Qingdao University of Technology; Harbin Institute of Technology	Gao, XJ (corresponding author), Harbin Inst Technol, Sch Civil Engn, 73 Huanghe Rd,Nangang Dist, Harbin 150090, Heilongjiang, Peoples R China.	gaoxj@hit.edu.cn	Chen, Tiefeng/AFL-6729-2022		National Natural Science Foundation of China [52108202]; China Postdoctoral Science Foundation [2022M710971]; Natural Sci- ence Foundation of Heilongjiang Province of China [LH2021E110]	National Natural Science Foundation of China(National Natural Science Foundation of China (NSFC)); China Postdoctoral Science Foundation(China Postdoctoral Science Foundation); Natural Sci- ence Foundation of Heilongjiang Province of China(Natural Science Foundation of Heilongjiang Province)	The authors would like to acknowledge the financial support of the National Natural Science Foundation of China (No. 52108202) , China Postdoctoral Science Foundation (No. 2022M710971) and Natural Sci- ence Foundation of Heilongjiang Province of China (No. LH2021E110) .		68	7	7	25	47	ELSEVIER SCI LTD	OXFORD	THE BOULEVARD, LANGFORD LANE, KIDLINGTON, OXFORD OX5 1GB, OXON, ENGLAND	0958-9465	1873-393X		CEMENT CONCRETE COMP	Cem. Concr. Compos.	NOV	2022	134
J	Li, YQ; Zhang, Y; Yu, H; Han, Y; Zuo, JN				Li, Yuqing; Zhang, Yu; Yu, Heng; Han, Yuan; Zuo, Jiane			Enhancing nitrate removal from urban stormwater in an inverted bioretention system	ECOLOGICAL ENGINEERING			English	Article						Urban stormwater; Inverted bioretention system; Nitrogen removal; Anoxic zone	NITROGEN REMOVAL; RUNOFF; PERFORMANCE; PHOSPHORUS; NUTRIENT; SATURATION; RETENTION; BIOCHAR; MEDIA; SCALE	Bioretention systems are widely used in sponge city to reduce the pollution caused by urban stormwater. However, limited nitrogen removal is observed in conventional bioretention systems due to the low nitrate elimination efficiency. In this study, an inverted bioretention system was developed by setting a gravel layer above a soil layer, with an anoxic zone formed to enhance biological denitrifi…	[Li, Yuqing; Zhang, Yu; Yu, Heng; Zuo, Jiane] Tsinghua Univ, Sch Environm, State Key Joint Lab Environm Simulat & Pollut Con, Beijing 100084, Peoples R China; [Han, Yuan] Beijing Enterprises Water Grp Ltd, Beijing 100102, Peoples R China	Tsinghua University	Zuo, JN (corresponding author), Tsinghua Univ, Sch Environm, State Key Joint Lab Environm Simulat & Pollut Con, Beijing 100084, Peoples R China.	yq-li17@mails.tsinghua.edu.cn; h-yu@mail.tsinghua.edu.cn; jiane.zuo@tsinghua.edu.cn			Major Science and Technology Program for Water Pollution Control and Treatment [2017ZX07103007]	Major Science and Technology Program for Water Pollution Control and Treatment	This work was supported by the Major Science and Technology Program for Water Pollution Control and Treatment (No. 2017ZX07103007).		35	5	6	11	85	ELSEVIER	AMSTERDAM	RADARWEG 29, 1043 NX AMSTERDAM, NETHERLANDS	0925-8574	1872-6992		ECOL ENG	Ecol. Eng.	NOV 1	2021	170
J	Zhu, PF; Sottorff, I; Zhang, T; Helmreich, B				Zhu, Panfeng; Sottorff, Ignacio; Zhang, Tong; Helmreich, Brigitte			Adsorption of Heavy Metals and Biocides from Building Runoff onto Granular Activated Carbon-The Influence of Different Fractions of Dissolved Organic Matter	WATER			English	Article						building runoff; biocides; DOM; heavy-metals; GAC; transformation products; water reuse	HUMIC-ACID; SIMULTANEOUS REMOVAL; WATER; BIOCHAR; COPPER; ZINC; PH; MICROPOLLUTANTS; PHARMACEUTICALS; TEMPERATURE	Building runoff presents a good opportunity for water reuse in urban infrastructures; however, it is often polluted by biocides and heavy metals. In order to mitigate the pollution and improve water quality, we analysed the adsorption of heavy metals and biocides onto granular activated carbon (GAC) and investigated the influence of dissolved organic matter (DOM) fractions (>100 kDa, 10-30 kDa, a…	[Zhu, Panfeng; Sottorff, Ignacio; Zhang, Tong; Helmreich, Brigitte] Tech Univ Munich, Chair Urban Water Syst Engn, TUM Sch Engn & Design, Coulombwall 3, D-85748 Garching, Germany	Technical University of Munich	Helmreich, B (corresponding author), Tech Univ Munich, Chair Urban Water Syst Engn, TUM Sch Engn & Design, Coulombwall 3, D-85748 Garching, Germany.	panfeng.zhu@tum.de; i.sottorff@tum.de; t.zhang@tum.de; b.helmreich@tum.de	Helmreich, Brigitte/O-4862-2015	Helmreich, Brigitte/0000-0003-4224-3329	China Scholarship Council	China Scholarship Council(China Scholarship Council)	This research was funded by a scholarship for Panfeng Zhu from China Scholarship Council.		65	0	0	0	0	MDPI	BASEL	ST ALBAN-ANLAGE 66, CH-4052 BASEL, SWITZERLAND		2073-4441		WATER-SUI	Water	JUN 1	2023	15	11
J	Zhang, KX; Garg, A; Mei, GX; Jiang, MJ; Wang, H; Huang, S; Gan, L				Zhang, Kexin; Garg, Ankit; Mei, Guoxiong; Jiang, Mingjie; Wang, Hao; Huang, Shan; Gan, Lin			Thermal performance and energy consumption analysis of eight types of extensive green roofs in subtropical monsoon climate	BUILDING AND ENVIRONMENT			English	Article						Green roof; Heat island effect; Building energy; Energy consumption; Energyplus	URBAN HEAT-ISLAND; TEMPERATURE; SIMULATION; MITIGATION; BEHAVIOR; BIOCHAR; IMPACT; PARAMETERS; VEGETATION; REDUCTION	The green roof is important for sustainable urban development. There is relatively lesser research on the thermal performance of green roofs considering the characteristics of the subtropical climate and differentiated structural design. In this study, the effects of different structural configurations of extensive green roof on its thermal performance under a subtropical monsoon climate conditio…	[Zhang, Kexin; Mei, Guoxiong; Jiang, Mingjie; Huang, Shan; Gan, Lin] Guangxi Univ, Coll Civil Engn & Architecture, Nanning, Guangxi, Peoples R China; [Zhang, Kexin; Mei, Guoxiong; Jiang, Mingjie; Huang, Shan; Gan, Lin] Guangxi Univ, Key Lab Disaster Prevent & Struct Safety, Minist Educ, Nanning, Guangxi, Peoples R China; [Zhang, Kexin; Mei, Guoxiong; Jiang, Mingjie; Huang, Shan; Gan, Lin] Key Lab…	Guangxi University; Guangxi University; Shantou University; Harbin Institute of Technology	Jiang, MJ (corresponding author), Guangxi Univ, Coll Civil Engn & Architecture, Nanning, Guangxi, Peoples R China.	1910302084@st.gxu.edu.cn; ankit@stu.edu.cn; 20150011@gxu.edu.cn; 20180121@gxu.edu.cn; 21B954005@stu.hit.edu.cn; hsgxu@st.gxu.edu.cn; 1910391017@st.gxu.edu.cn		Huang, Shan/0000-0002-6122-6527	NSFC [51878185,52178321,52108309]; [LMCE202103]	NSFC(National Natural Science Foundation of China (NSFC));	Acknowledgements The authors gratefully acknowledge the financial support from the research grant (No. 51878185,52178321,52108309) from NSFC, a project supported by the Foundation of Guangdong Key Laboratory of Oceanic Civil Engineering (LMCE202103) .		46	8	8	6	18	PERGAMON-ELSEVIER SCIENCE LTD	OXFORD	THE BOULEVARD, LANGFORD LANE, KIDLINGTON, OXFORD OX5 1GB, ENGLAND	0360-1323	1873-684X		BUILD ENVIRON	Build. Environ.	MAY 15	2022	216
J	Esfandiar, N; Suri, R; McKenzie, ER				Esfandiar, Narges; Suri, Rominder; McKenzie, Erica R.			Competitive sorption of Cd, Cr, Cu, Ni, Pb and Zn from stormwater runoff by five low-cost sorbents; Effects of co-contaminants, humic acid, salinity and pH	JOURNAL OF HAZARDOUS MATERIALS			English	Article						Stormwater treatment; Metals; Removal mechanism; Competitive effects; Dissolved organic carbon	HEAVY-METALS; AQUEOUS-SOLUTIONS; NATURAL CLINOPTILOLITE; WATER RUNOFF; WASTE-WATER; REMOVAL; ADSORPTION; IONS; COMPLEXATION; ADSORBENTS	For a comprehensive estimation of metals removal by sorbents in stormwater systems, it is essential to evaluate the impacts of co-contaminants. However, most studies consider only metals (single or multiple), which may overestimate performance. This study employed a batch method to investigate the performance of five low-cost sorbents - coconut coir fiber (CCF), blast furnace slag (BFS), waste ti…	[Esfandiar, Narges; Suri, Rominder; McKenzie, Erica R.] Temple Univ, Dept Civil & Environm Engn, Philadelphia, PA 19122 USA	Pennsylvania Commonwealth System of Higher Education (PCSHE); Temple University	McKenzie, ER (corresponding author), Temple Univ, Dept Civil & Environm Engn, Philadelphia, PA 19122 USA.	ermckenzie@temple.edu	McKenzie, Erica/F-1310-2010	McKenzie, Erica/0000-0003-1982-2533	Pennsylvania Sea Grant (PASG) by National Oceanic and Atmospheric Administration (NOAA) , U.S. Department of Commerce, United States [5827-TU-NOAA-0074]; Civil and Environmental Engineering Department (CEE) at Temple University, Philadelphia, PA, United States	Pennsylvania Sea Grant (PASG) by National Oceanic and Atmospheric Administration (NOAA) , U.S. Department of Commerce, United States; Civil and Environmental Engineering Department (CEE) at Temple University, Philadelphia, PA, United States	This work was partially supported by the Pennsylvania Sea Grant (PASG) [grant number 5827-TU-NOAA-0074, 2018] from the National Oceanic and Atmospheric Administration (NOAA) , U.S. Department of Commerce, United States, and the Civil and Environmental Engineering Department (CEE) at Temple University, Philadelphia, PA, United States. The opinions expressed in this article are those of the authors…		68	47	48	11	141	ELSEVIER	AMSTERDAM	RADARWEG 29, 1043 NX AMSTERDAM, NETHERLANDS	0304-3894	1873-3336		J HAZARD MATER	J. Hazard. Mater.	FEB 5	2022	423		A
J	Afrooz, ARMN; Boehm, AB				Afrooz, A. R. M. Nabiul; Boehm, Alexandria B.			Effects of submerged zone, media aging, and antecedent dry period on the performance of biochar-amended biofilters in removing fecal indicators and nutrients from natural stormwater	ECOLOGICAL ENGINEERING			English	Article						Low impact development; Biofilters; Bioretention media; Saturated zone; Biofilm; Stormwater	ESCHERICHIA-COLI REMOVAL; BACTERIAL TRANSPORT; BIORETENTION MEDIA; NITROGEN REMOVAL; POLLUTANT REMOVAL; POROUS-MEDIA; WATER; BIOFILTRATION; PHOSPHORUS; FILTRATION	Biochar has demonstrated promising performance as an amendment to biofilter soil media in removing fecal indicator bacteria (FIB) from simulated stormwater. However, there is no study that investigates its efficacy in treating natural stormwater runoff. Additional information, including the effects of antecedent dry period, microbial biofilm, and presence of a saturation zone on the performance o…	[Afrooz, A. R. M. Nabiul; Boehm, Alexandria B.] Stanford Univ, Dept Civil & Environm Engn, 473 Via Ortega, Stanford, CA 94305 USA; [Afrooz, A. R. M. Nabiul; Boehm, Alexandria B.] Engn Res Ctr ERC Reinventing Nations Urban Water, Stanford, CA USA	Stanford University	Afrooz, ARMN (corresponding author), Stanford Univ, Dept Civil & Environm Engn, 473 Via Ortega, Stanford, CA 94305 USA.	rnabiul@stanford.edu	; Afrooz, ARM/B-1701-2014	Boehm, Alexandria/0000-0002-8162-5090; Afrooz, Nabiul/0000-0002-0588-6942; Afrooz, ARM/0000-0002-9141-9426	Re-inventing Nations Urban Water Infrastructure (ReNUWIt), an Engineering Research Center (ERC) - U.S. National Science Foundation [EEC-1028968]	Re-inventing Nations Urban Water Infrastructure (ReNUWIt), an Engineering Research Center (ERC) - U.S. National Science Foundation	This work was supported by Re-inventing Nations Urban Water Infrastructure (ReNUWIt), an Engineering Research Center (ERC) funded by the U.S. National Science Foundation (Grant# EEC-1028968). We thank Dr. Guangchao Li at Stanford EM-1 lab for helping with the Total Phosphorus analysis.		78	63	64	4	138	ELSEVIER SCIENCE BV	AMSTERDAM	PO BOX 211, 1000 AE AMSTERDAM, NETHERLANDS	0925-8574	1872-6992		ECOL ENG	Ecol. Eng.	MAY	2017	102
J	Tan, KH; Qin, YH; Du, TY; Li, LL; Zhang, L; Wang, JS				Tan, Kanghao; Qin, Yinghong; Du, Taiyang; Li, Lingling; Zhang, Lei; Wang, Junsong			Biochar from waste biomass as hygroscopic filler for pervious concrete to improve evaporative cooling performance	CONSTRUCTION AND BUILDING MATERIALS			English	Article						Pervious concrete; Biochar particles; Evaporative cooling; Hygrothermal properties; Water absorption rate	DEPENDENT THERMAL-CONDUCTIVITY; WATER-RETENTION PROPERTIES; HEAT; ENERGY; TEMPERATURE; COMPOSITES; PAVEMENTS; IMPACT	Pervious concrete is regarded as a contributing material to reduce surface runoff, purify water pollution, and mitigate the urban heat island. However, the poor water absorption and retention capabilities of it could not meet the need of evaporation. To prolong its evaporative cooling effect, this study introduces a modified method of incorporating biochar (BC) particles into pervious concrete as…	[Tan, Kanghao; Li, Lingling; Zhang, Lei; Wang, Junsong] South China Univ Technol, Sch Architecture, State Key Lab Subtrop Bldg Sci, Guangzhou 510641, Guangdong, Peoples R China; [Qin, Yinghong] Guangxi Univ, Coll Civil Engn & Architecture, 100 Univ Rd, Nanning 530004, Guangxi, Peoples R China; [Du, Taiyang] Hualan Design & Consulting Grp, Hua Dong Rd 39, Nanning 530011, Peoples R China	South China University of Technology; Guangxi University	Wang, JS (corresponding author), South China Univ Technol, Sch Architecture, State Key Lab Subtrop Bldg Sci, Guangzhou 510641, Guangdong, Peoples R China.	arwjs@mail.scut.edu.cn	kanghao, Tan/GNM-9884-2022; Wang, Junsong/GNH-4461-2022	Wang, Junsong/0000-0002-2401-5771	National Natural Science Foundation of China [52008173, 51678243, 51878287, 41561015]; Science Foundation of Guangxi [2018GXNSFAA294070, 2018GXNSFDA138009]; Guangdong Natural Science Foundation [2018A0303130094]; State Key Lab of Subtropical Building Science, South China University of Technology [2021ZB20]; China Postdoctoral Science Foundation [2020M682706]; outstanding scholar program and high-…	National Natural Science Foundation of China(National Natural Science Foundation of China (NSFC)); Science Foundation of Guangxi; Guangdong Natural Science Foundation(National Natural Science Foundation of Guangdong Province); State Key Lab of Subtropical Building Science, South China University of Technology; China Postdoctoral Science Foundation(China Postdoctoral Science Foundation); outstandi…	This work is jointly supported by the National Natural Science Foundation of China (No. 52008173, 51678243, 51878287, 41561015), the outstanding scholar program and high-level innovation team in Guangxi colleges (granted to Dr. Yinghong Qin), the Science Foundation of Guangxi (No. 2018GXNSFAA294070, 2018GXNSFDA138009), the Guangdong Natural Science Foundation (No. 2018A0303130094), State Key Lab …		50	81	82	15	79	ELSEVIER SCI LTD	OXFORD	THE BOULEVARD, LANGFORD LANE, KIDLINGTON, OXFORD OX5 1GB, OXON, ENGLAND	0950-0618	1879-0526		CONSTR BUILD MATER	Constr. Build. Mater.	JUN 14	2021	287
J	Gupta, S; Tulliani, JM; Kua, HW				Gupta, Souradeep; Tulliani, Jean-Marc; Kua, Harn Wei			Carbonaceous admixtures in cementitious building materials: Effect of particle size blending on rheology, packing, early age properties and processing energy demand	SCIENCE OF THE TOTAL ENVIRONMENT			English	Article						Biochar; Cement; Concrete; Strength; Hydration	WATER FILM THICKNESS; FLY-ASH; BIOCHAR; WASTE; WOOD; CONCRETE; FLOWABILITY; IMPROVEMENT; PYROLYSIS; HYDRATION	Application of biochar, produced from locally generated wastes, as admixture in cement is a strategy to upcycle biomass waste and produce durable building materials. This research explores the influence of particle size and porosity of biochar, prepared from coconut shell and wood waste, added at 2 wt% of cement, on rheology, setting time, hydration and early age strength of cement mortar. For ea…	[Gupta, Souradeep] Indian Inst Sci, Ctr Sustainable Technol, Bengalru, India; [Tulliani, Jean-Marc] Politecn Torino, INSTM RU PoliTO LINCE, Dept Appl Sci & Technol, Turin, Italy; [Kua, Harn Wei] Natl Univ Singapore, Sch Design & Environm, Dept Bldg, Singapore, Singapore	Indian Institute of Science (IISC) - Bangalore; Polytechnic University of Turin; National University of Singapore	Gupta, S (corresponding author), Indian Inst Sci, Ctr Sustainable Technol, Bengalru, India.;Kua, HW (corresponding author), Natl Univ Singapore, Sch Design & Environm, Dept Bldg, Singapore, Singapore.	souradeep@iisc.ac.in; jeanmarc.tulliani@polito.it; bdgkuahw@nus.edu.sg							70	12	13	10	47	ELSEVIER	AMSTERDAM	RADARWEG 29, 1043 NX AMSTERDAM, NETHERLANDS	0048-9697	1879-1026		SCI TOTAL ENVIRON	Sci. Total Environ.	FEB 10	2022	807		2
J	Jia, YQ; Li, H; He, XL; Li, PE; Wang, ZH				Jia, Yaqi; Li, He; He, Xiaole; Li, Pangen; Wang, Zhenhong			Effect of biochar from municipal solid waste on mechanical and freeze-thaw properties of concrete	CONSTRUCTION AND BUILDING MATERIALS			English	Article						Municipal solid waste; Biochar concrete; Mechanical properties; Freeze-thaw resistance	SOIL; IMPROVEMENT; DURABILITY; PYROLYSIS; ASH	Global municipal solid waste (MSW) generation and cement manufacture pose catastrophic threats to the environment. Although positive impacts have been demonstrated for biochar originating from single biomass in concrete, limited studies focused on the biochar from the pyrolysis of municipal solid waste, and the freeze-thaw resistance of biochar concrete still remains unknown. This paper explored …	[Li, He; He, Xiaole; Li, Pangen; Wang, Zhenhong] Changan Univ, Key Lab Subsurface Hydrol & Ecol Effects Arid Reg, Minist Educ, Xian 710064, Peoples R China; [Jia, Yaqi] Jiangsu Inst Geol & Mineral Design & Res, Xuzhou 221006, Jiangsu, Peoples R China; [Jia, Yaqi; Li, He; He, Xiaole; Li, Pangen; Wang, Zhenhong] Changan Univ, Sch Water & Environm, Xian 710064, Shaanxi, Peoples R China; [Wang, Zhenh…	Chang'an University; Chang'an University; Chang'an University	Wang, ZH (corresponding author), Changan Univ, Key Lab Subsurface Hydrol & Ecol Effects Arid Reg, Minist Educ, Xian 710064, Shannxi, Peoples R China.	w_zhenhong@126.com			Research Project of China National Administration of Coal Geology [ZMKJ-2022-JBGS01]	Research Project of China National Administration of Coal Geology	Acknowledgement This work was supported by the Research Project of China National Administration of Coal Geology (ZMKJ-2022-JBGS01) .		48	1	1	18	18	ELSEVIER SCI LTD	OXFORD	THE BOULEVARD, LANGFORD LANE, KIDLINGTON, OXFORD OX5 1GB, OXON, ENGLAND	0950-0618	1879-0526		CONSTR BUILD MATER	Constr. Build. Mater.	MAR 3	2023	368
J	Beskopylny, AN; Stel'makh, SA; Shcherban', EM; Mailyan, LR; Meskhi, B; Smolyanichenko, AS; Varavka, V; Beskopylny, N; Dotsenko, N				Beskopylny, Alexey N.; Stel'makh, Sergey A.; Shcherban', Evgenii M.; Mailyan, Levon R.; Meskhi, Besarion; Smolyanichenko, Alla S.; Varavka, Valery; Beskopylny, Nikita; Dotsenko, Natal'ya			Influence of Electromagnetic Activation of Cement Paste and Nano-Modification by Rice Straw Biochar on the Structure and Characteristics of Concrete	JOURNAL OF COMPOSITES SCIENCE			English	Article						composite materials; rise straw; biochar; nanomodified concrete; vortex layer apparatus; electromagnetic treatment	SELF-COMPACTING CONCRETE; HUSK ASH; STRENGTH; SHAPE	One main global problem is the accumulation of a large amount of agricultural waste. This problem causes environmental pollution and requires an immediate comprehensive solution. The purpose of this study was scientific substantiation and experimental testing, at the micro- and macro levels, of the joint influence of electromagnetic activation of cement paste and nano-modification by rice straw b…	[Beskopylny, Alexey N.] Don State Tech Univ, Dept Transport Syst, Fac Rd & Transport Syst, Rostov Na Donu 344003, Russia; [Stel'makh, Sergey A.; Dotsenko, Natal'ya] Don State Tech Univ, Dept Construct Unique Bldg & Struct, Rostov Na Donu 344003, Russia; [Shcherban', Evgenii M.] Don State Tech Univ, Dept Engn Geol Bases & Fdn, Rostov Na Donu 344003, Russia; [Mailyan, Levon R.] Don State Tech Univ,…	Don State Technical University; Don State Technical University; Don State Technical University; Don State Technical University; Don State Technical University; Don State Technical University; Don State Technical University; Don State Technical University	Beskopylny, AN (corresponding author), Don State Tech Univ, Dept Transport Syst, Fac Rd & Transport Syst, Rostov Na Donu 344003, Russia.	besk-an@yandex.ru	Meskhi, Besarion/GYJ-5572-2022; Alla, Smolyanichenko/ADW-6799-2022; Beskopylnyy, Alexey/P-1373-2015; Shcherban', Evgenii/AAG-6070-2020; Stel'makh, Sergei/AAG-6076-2020	Meskhi, Besarion/0000-0003-3497-3102; Beskopylnyy, Alexey/0000-0002-6173-9365; Shcherban', Evgenii/0000-0001-5376-247X; Stel'makh, Sergei/0000-0002-0364-5504	Don State Technical University	Don State Technical University	The authors would like to acknowledge the administration of Don State Technical University for their resources and financial support.		66	6	6	3	5	MDPI	BASEL	ST ALBAN-ANLAGE 66, CH-4052 BASEL, SWITZERLAND	2504-477X			J COMPOS SCI	J. Compos. Sci.	SEP	2022	6	9
J	Chen, L; Zhang, YY; Labianca, C; Wang, L; Ruan, SQ; Poon, CS; Ok, YS; Tsang, DCW				Chen, Liang; Zhang, Yuying; Labianca, Claudia; Wang, Lei; Ruan, Shaoqin; Poon, Chi Sun; Ok, Yong Sik; Tsang, Daniel C. W.			Carbon-negative cement-bonded biochar particleboards	BIOCHAR			English	Article						Biochar-cement composite; Carbon neutrality; Wood waste biochar; Magnesium oxysulfate cement; Climate-positive construction materials	MAGNESIA; MGO	Biochar from bio-waste pyrolysis presents excellent CO2 sequestration capacity. This study innovated the design of cement-bonded particleboards utilizing a substantial amount of 50-70 wt.% pre-soaked biochar to render the products carbon-negative. We investigated the roles of biochar in magnesium oxysulfate cement (MOSC) system and demonstrated good mechanical and functional properties of biochar…	[Chen, Liang; Zhang, Yuying; Labianca, Claudia; Poon, Chi Sun; Tsang, Daniel C. W.] Hong Kong Polytech Univ, Dept Civil & Environm Engn, Hung Hom, Kowloon, Hong Kong, Peoples R China; [Wang, Lei] Zhejiang Univ, State Key Lab Clean Energy Utilizat, Hangzhou 310027, Peoples R China; [Ruan, Shaoqin] Zhejiang Univ, Coll Civil Engn & Architecture, Hangzhou 310058, Peoples R China; [Poon, Chi Sun; Tsan…	Hong Kong Polytechnic University; Zhejiang University; Zhejiang University; Hong Kong Polytechnic University; Korea University; Korea University	Tsang, DCW (corresponding author), Hong Kong Polytech Univ, Dept Civil & Environm Engn, Hung Hom, Kowloon, Hong Kong, Peoples R China.;Wang, L (corresponding author), Zhejiang Univ, State Key Lab Clean Energy Utilizat, Hangzhou 310027, Peoples R China.;Tsang, DCW (corresponding author), Hong Kong Polytech Univ, Res Ctr Resources Engn Carbon Neutral, Hung Hom, Kowloon, Hong Kong, Peoples R China.	wanglei.leo@zju.edu.cn; dan.tsang@polyu.edu.hk	郭, 青霞/GZH-2618-2022; tao, sun/AAA-4645-2020; Labianca, Claudia/AAG-2833-2021; WANG, Lei/C-8138-2018; Tsang, Dan/E-5442-2012	Labianca, Claudia/0000-0002-0704-6197; WANG, Lei/0000-0002-0336-7241; Tsang, Dan/0000-0002-6850-733X	Hong Kong Green Tech Fund [GTF202020153]; Alexander von Humboldt Foundation, Germany (AvH); Open Project of State Key Laboratory of Clean Energy Utilization, Zhejiang University [ZJUCEU2022001]	Hong Kong Green Tech Fund; Alexander von Humboldt Foundation, Germany (AvH)(Alexander von Humboldt Foundation); Open Project of State Key Laboratory of Clean Energy Utilization, Zhejiang University	The authors appreciate the financial support from the Hong Kong Green Tech Fund (GTF202020153), Alexander von Humboldt Foundation, Germany (AvH), and Open Project of State Key Laboratory of Clean Energy Utilization, Zhejiang University (ZJUCEU2022001).		34	6	6	20	55	SPRINGER SINGAPORE PTE LTD	SINGAPORE	#04-01 CENCON I, 1 TANNERY RD, SINGAPORE 347719, SINGAPORE	2524-7972	2524-7867		BIOCHAR	Biochar	DEC	2022	4	1
J	Osial, M; Pregowska, A; Wilczewski, S; Urbanska, W; Giersig, M				Osial, Magdalena; Pregowska, Agnieszka; Wilczewski, Slawomir; Urbanska, Weronika; Giersig, Michael			Waste Management for Green Concrete Solutions: A Concise Critical Review	RECYCLING			English	Review						green concrete; waste management; waste as a cement filler; secondary raw materials; alternative cements	SUPPLEMENTARY CEMENTITIOUS MATERIALS; BIOMASS FLY-ASH; WHEAT-STRAW ASH; MECHANICAL-PROPERTIES; DURABILITY PROPERTIES; TIRE RUBBER; POLYPROPYLENE FIBERS; REINFORCED-CONCRETE; STRENGTH; BIOCHAR	Reinforced concrete based on ordinary Portland cement (OPC) is one of the most commonly used materials in modern buildings. Due to the global growth of the building industry, concrete components have been partially or completely replaced with waste materials that can be used as binders or aggregates. Besides the ecological aspects, modern architecture widely needs materials to make the concrete d…	[Osial, Magdalena; Wilczewski, Slawomir; Giersig, Michael] Polish Acad Sci, Inst Fundamental Technol Res, Dept Theory Continuous Media, Pawinskiego 5B St, PL-02106 Warsaw, Poland; [Pregowska, Agnieszka] Polish Acad Sci, Inst Fundamental Technol Res, Dept Informat & Computat Sci, Pawinskiego 5B St, PL-02106 Warsaw, Poland; [Wilczewski, Slawomir] Bydgoszcz Univ Sci & Technol, Fac Chem Technol & Eng…	Polish Academy of Sciences; Institute of Fundamental Technological Research of the Polish Academy of Sciences; Polish Academy of Sciences; Institute of Fundamental Technological Research of the Polish Academy of Sciences; Bydgoszcz University of Science & Technology; Wroclaw University of Science & Technology	Osial, M (corresponding author), Polish Acad Sci, Inst Fundamental Technol Res, Dept Theory Continuous Media, Pawinskiego 5B St, PL-02106 Warsaw, Poland.;Urbanska, W (corresponding author), Wroclaw Univ Sci & Technol, Fac Environm Engn, Wybrzeze Wyspianskiego 27, PL-50370 Wroclaw, Poland.	mosial@chem.uw.edu.pl; aprego@ippt.pan.pl; slawomir.wilczewski@pbs.edu.pl; weronika.urbanska@pwr.edu.pl; mgiersig@ippt.pan.pl	Wilczewski, Sławomir/AAM-7110-2021	Wilczewski, Sławomir/0000-0002-7615-7077; Urbanska, Weronika Martyna/0000-0002-6523-7629; Osial, Magdalena/0000-0003-3076-3415					156	5	5	7	15	MDPI	BASEL	ST ALBAN-ANLAGE 66, CH-4052 BASEL, SWITZERLAND		2313-4321		RECYCLING-BASEL	Recycling-Basel	JUN	2022	7	3
C	Restuccia, L; Ferro, GA; Suarez-Riera, D; Sirico, A; Bernardi, P; Belletti, B; Malcevschi, A		Berto, F; Iacoviello, F; Kourkoulis, S; Moreira, P; Reis, PNB; Sedmak, A; Susmel, L; Tavares, P		Restuccia, Luciana; Ferro, Giuseppe Andrea; Suarez-Riera, Daniel; Sirico, Alice; Bernardi, Patrizia; Belletti, Beatrice; Malcevschi, Alessio			Mechanical characterization of different biochar-based cement composites	1ST VIRTUAL CONFERENCE ON STRUCTURAL INTEGRITY (VCSI1)	Procedia Structural Integrity		English	Proceedings Paper	1st Virtual Conference on Structural Integrity (VCSI)	JAN 16, 2020	ELECTR NETWORK	European Struct Integr Soc, Natl Grp,Portuguese Struct Integr Soc,Drustvo Integritet Vek Konstrukcija,Greek Soc Expt Mech Mat,Italian Grp Fracture		Biochar; nanoparticles; filler; cement-based composites; flexural strength; toughness	CONCRETE; FILLER; SIZE	The attention on the use of raw materials, the energy consumption as well as carbon dioxide production of cement factories are boosting the experimentation on innovative and sustainable materials in concrete technology. In recent years, biochar has become an emblematic material with a thousand facets. Mainly investigated up to now as amending in the agricultural field, biochar can be explored as …	[Restuccia, Luciana; Ferro, Giuseppe Andrea; Suarez-Riera, Daniel] Politecn Torino, Dept Struct Geotech & Bldg Engn, I-10129 Turin, Italy; [Sirico, Alice; Bernardi, Patrizia; Belletti, Beatrice] Univ Parma, Dept Engn & Architecture, I-43124 Parma, Italy; [Malcevschi, Alessio] Univ Parma, Dept Chem Life Sci & Environm Sustainabil, I-43124 Parma, Italy	Polytechnic University of Turin; University of Parma; University of Parma	Sirico, A (corresponding author), Univ Parma, Dept Engn & Architecture, I-43124 Parma, Italy.	alice.sirico@unipr.it	Sirico, Alice/ACF-5554-2022; RESTUCCIA, LUCIANA/AAG-6761-2019; FERRO, GIUSEPPE ANDREA/F-8300-2018	Sirico, Alice/0000-0001-5897-1641; RESTUCCIA, LUCIANA/0000-0002-6999-0466; FERRO, GIUSEPPE ANDREA/0000-0002-0622-4203					31	24	24	4	25	ELSEVIER	AMSTERDAM	Radarweg 29, PO Box 211, AMSTERDAM, NETHERLANDS	2452-3216			PROCEDIA STRUCT INTE			2020	25
J	Sirico, A; Belletti, B; Bernardi, P; Malcevschi, A; Pagliari, F; Fornoni, P; Moretti, E				Sirico, Alice; Belletti, Beatrice; Bernardi, Patrizia; Malcevschi, Alessio; Pagliari, Federico; Fornoni, Paolo; Moretti, Emanuele			Effects of biochar addition on long-term behavior of concrete	THEORETICAL AND APPLIED FRACTURE MECHANICS			English	Article						Biochar; Concrete; Waste; Mechanical characterization; Durability; Sustainability	CEMENT; CARBON; COMPOSITE; BIOMASS; FILLER; WASTE	In the context of circular economy, the production of innovative concretes that incorporate different kinds of waste material is gaining increasing interest among the researcher community, the regulatory agencies, and the policy makers. The rising awareness of the need of a sustainable development also in the building sector has indeed boosted the research towards the use, for concrete production…	[Sirico, Alice; Belletti, Beatrice; Bernardi, Patrizia; Pagliari, Federico] Univ Parma, Dept Engn & Architecture, Parco Area Sci 181-A, I-43124 Parma, Italy; [Malcevschi, Alessio] Univ Parma, Dept Chem Life Sci & Environm Sustainabil, Parco Area Sci 11-A, I-43124 Parma, Italy; [Fornoni, Paolo; Moretti, Emanuele] Mapei SpA, Res & Dev, Via Cafiero 22, Milan, Italy	University of Parma; University of Parma	Sirico, A (corresponding author), Univ Parma, Dept Engn & Architecture, Parco Area Sci 181-A, I-43124 Parma, Italy.	alice.sirico@unipr.it	Sirico, Alice/ACF-5554-2022	Sirico, Alice/0000-0001-5897-1641					50	2	2	12	13	ELSEVIER	AMSTERDAM	RADARWEG 29, 1043 NX AMSTERDAM, NETHERLANDS	0167-8442	1872-7638		THEOR APPL FRACT MEC	Theor. Appl. Fract. Mech.	DEC	2022	122
J	Sun, YQ; Chen, SS; Lau, AYT; Tsang, DCW; Mohanty, SK; Bhatnagar, A; Rinklebe, J; Lin, KYA; Ok, YS				Sun, Yuqing; Chen, Season S.; Lau, Abbe Y. T.; Tsang, Daniel C. W.; Mohanty, Sanjay K.; Bhatnagar, Amit; Rinklebe, Joerg; Lin, Kun-Yi Andrew; Ok, Yong Sik			Waste-derived compost and biochar amendments for stormwater treatment in bioretention column: Co-transport of metals and colloids	JOURNAL OF HAZARDOUS MATERIALS			English	Article						Metal/metalloid immobilization; Engineered biochar; Sustainable waste management; Bioretention systems; Stormwater treatment	ZERO-VALENT IRON; ESCHERICHIA-COLI; HUMIC-ACID; REMOVAL; WATER; SOIL; SLUDGE; DISSOLUTION; FABRICATION; MITIGATION	Bioretention systems, as one of the most practical management operations for low impact development of water recovery, utilize different soil amendments to remove contaminants from stormwater. For the sake of urban sustainability, the utilization of amendments derived from waste materials has a potential to reduce waste disposal at landfill while improving the quality of stormwater discharge. Thi…	[Sun, Yuqing; Chen, Season S.; Lau, Abbe Y. T.; Tsang, Daniel C. W.] Hong Kong Polytech Univ, Dept Civil & Environm Engn, Hung Hom, Kowloon, Hong Kong, Peoples R China; [Mohanty, Sanjay K.] Univ Calif Los Angeles, Dept Civil & Environm Engn, Los Angeles, CA 90095 USA; [Bhatnagar, Amit] Univ Eastern Finland, Dept Environm & Biol Sci, POB 1627, FI-70211 Kuopio, Finland; [Rinklebe, Joerg] Univ Wuppe…	Hong Kong Polytechnic University; University of California System; University of California Los Angeles; University of Eastern Finland; University of Wuppertal; National Chung Hsing University; Korea University; Korea University; Sejong University	Tsang, DCW (corresponding author), Hong Kong Polytech Univ, Dept Civil & Environm Engn, Hung Hom, Kowloon, Hong Kong, Peoples R China.	dan.tsang@polyu.edu.hk	Sun, Yuqing/AAX-6464-2021; Rinklebe, Joerg/Y-2398-2019; Ok, Yong Sik/R-6739-2016; Tsang, Dan/E-5442-2012; Sun, Yuqing/Q-2469-2019; Bhatnagar, Amit/A-8838-2008; Mohanty, Sanjay K/H-9304-2013; Lin, Kun-Yi/B-2503-2015	Sun, Yuqing/0000-0003-1022-4705; Rinklebe, Joerg/0000-0001-7404-1639; Ok, Yong Sik/0000-0003-3401-0912; Tsang, Dan/0000-0002-6850-733X; Sun, Yuqing/0000-0003-1022-4705; Bhatnagar, Amit/0000-0002-3565-9943; Mohanty, Sanjay K/0000-0002-2142-5572; Lin, Kun-Yi/0000-0003-1058-3097	Hong Kong Research Grants Council [PolyU 15217818]; Hong Kong Environment and Conversation Fund [ECF87/2017]	Hong Kong Research Grants Council(Hong Kong Research Grants Council); Hong Kong Environment and Conversation Fund	The authors appreciate the financial support from the Hong Kong Research Grants Council (PolyU 15217818) and Hong Kong Environment and Conversation Fund (< GN2 > ECF87/2017 < / GN2 >) for this study.		51	61	61	8	238	ELSEVIER	AMSTERDAM	RADARWEG 29, 1043 NX AMSTERDAM, NETHERLANDS	0304-3894	1873-3336		J HAZARD MATER	J. Hazard. Mater.	FEB 5	2020	383
C	Sal, J		Pruskova, K; Vochozka, M; Senitkova, IJ; Fariborz, H; Vachal, J; Kulhanek, F; Juhas, P; Marecek, J; Olah, J; Flimel, M; Melcher, J; Silaarova, S		Sal, Jiri			Cement with the addition of charred fermentation residues	10TH INTERNATIONAL SCIENTIFIC CONFERENCE BUILDING DEFECTS (BUILDING DEFECTS 2018)	MATEC Web of Conferences		English	Proceedings Paper	10th International Scientific Conference on Building Defects (Building Defects)	NOV 29-30, 2018	Inst Technol & Business, Ceske Budejovice, CZECH REPUBLIC	Czech Chamber Certified Engineers & Technicians	Inst Technol & Business			This article focuses on the use and disposal of biochar waste from residual and waste biomass. Traditional use of this substance is its addition to arable land to improve its quality. The basic biochar component is a chemically stable carbon, which binds nutrients and other important substances to plant growth. Positive effects on arable land have been sufficiently demonstrated, unfortunately amo…	[Sal, Jiri] Inst Technol & Businesses Ceske Budejovice, Ceske Budejovice, Czech Republic	Institute of Technology & Business, Ceske Budejovice	Sal, J (corresponding author), Inst Technol & Businesses Ceske Budejovice, Ceske Budejovice, Czech Republic.	sal@mail.vstecb.cz	Šál, Jiří/AAF-5467-2021	Šál, Jiří/0000-0002-8517-7942					3	0	0	0	3	E D P SCIENCES	CEDEX A	17 AVE DU HOGGAR PARC D ACTIVITES COUTABOEUF BP 112, F-91944 CEDEX A, FRANCE	2261-236X			MATEC WEB CONF			2019	279
J	Kuoppamaki, K; Lima, SP; Scopetani, C; Setala, H				Kuoppamaki, Kirsi; Pflugmacher Lima, Stephan; Scopetani, Costanza; Setala, Heikki			The ability of selected filter materials in removing nutrients, metals, and microplastics from stormwater in biofilter structures	JOURNAL OF ENVIRONMENTAL QUALITY			English	Article								Creative solutions to manage stormwater include ecologically based designs, such as biofilter structures. A laboratory experiment was established to study the ability of biofilters to remove nutrients, metals, total suspended solids (TSS), and total organic C originating from roadside stormwater as melted snow. Special attention was paid to the removal of P. In addition, the fate of microplastics…	[Kuoppamaki, Kirsi; Pflugmacher Lima, Stephan; Scopetani, Costanza; Setala, Heikki] Univ Helsinki, Ecosyst & Environm Res Programme, Fac Biol & Environm Sci, Niemenkatu 73, FIN-15140 Lahti, Finland; [Pflugmacher Lima, Stephan] Korean Inst Sci & Technol, KIST Europe, Joint Lab Appl Ecotoxicol, Campus E71, D-66123 Saarbrucken, Germany; [Pflugmacher Lima, Stephan] Univ Manitoba, Dept Environm & Geog…	University of Helsinki; Korea Institute of Science & Technology (KIST); University of Manitoba	Kuoppamaki, K (corresponding author), Univ Helsinki, Ecosyst & Environm Res Programme, Fac Biol & Environm Sci, Niemenkatu 73, FIN-15140 Lahti, Finland.	kirsi.kuoppamaki@helsinki.fi	Kuoppamaki, Kirsi/E-8699-2015; Setälä, Heikki M/P-7354-2015	Kuoppamaki, Kirsi/0000-0002-6703-4024; Setala, Heikki Martti/0000-0002-5230-4001; Scopetani, Costanza/0000-0002-3942-2310; Pflugmacher, Stephan/0000-0003-1052-2905	Helsinki-Uusimaa Regional Council [AIKO032]	Helsinki-Uusimaa Regional Council	This study, being part of the Hule Smart and Clean project, was funded by the Helsinki-Uusimaa Regional Council (project no. AIKO032). AlmaLab (University of Helsinki) and Lammi Biological Station analyzed water samples for nutrients and metals and conducted the leaching tests. Jeong In Heo, Ji-HyeonNoh, Amalia Sulk, Laura Tudeer (students at the University of Helsinki) helped in running the expe…		40	14	14	6	48	WILEY	HOBOKEN	111 RIVER ST, HOBOKEN 07030-5774, NJ USA	0047-2425	1537-2537		J ENVIRON QUAL	J. Environ. Qual.	MAR	2021	50	2
J	Gupta, S; Wei, KH; Dai, PS				Gupta, Souradeep; Wei, Kua Ham; Dai, Pang Sze			Effect of biochar on mechanical and permeability properties of concrete exposed to elevated temperature	CONSTRUCTION AND BUILDING MATERIALS			English	Article						Biochar; Concrete; Permeability; Strength; Silica fume	HIGH-STRENGTH CONCRETE; HIGH-PERFORMANCE CONCRETE; RUBBER-WOOD-SAWDUST; SILICA FUME; COMPRESSIVE STRENGTH; PORE PRESSURE; CEMENT PASTE; FLY-ASH; MORTAR; WASTE	Although many inorganic fillers have been explored as supplementary cementitious admixtures, there is limited exploration into role of porous biochar, prepared from lignocellulosic biomass, in modifying mechanical and durability performance of structural grade concrete exposed to elevated temperature. This study investigates the effect of biochar particles, prepared by pyrolysis of woody biomass …	[Gupta, Souradeep; Wei, Kua Ham] Natl Univ Singapore, Dept Bldg, 4 Architecture Dr, Singapore 117566, Singapore; [Dai, Pang Sze] Natl Univ Singapore, Fac Engn, Dept Civil & Environm Engn, Singapore 117576, Singapore	National University of Singapore; National University of Singapore	Gupta, S (corresponding author), Natl Univ Singapore, Dept Bldg, 4 Architecture Dr, Singapore 117566, Singapore.	bdgsou@nus.edu.sg		Gupta, Souradeep/0000-0003-1130-5400	Ministry of Education, Singapore [R-296-000-163-112]	Ministry of Education, Singapore(Ministry of Education, Singapore)	Support from Ministry of Education, Singapore through Academic Research Fund (tier-1) (R-296-000-163-112) is acknowledged and appreciated.		74	60	60	5	51	ELSEVIER SCI LTD	OXFORD	THE BOULEVARD, LANGFORD LANE, KIDLINGTON, OXFORD OX5 1GB, OXON, ENGLAND	0950-0618	1879-0526		CONSTR BUILD MATER	Constr. Build. Mater.	FEB 20	2020	234
J	Neve, S; Du, J; Barhemat, R; Meng, WA; Bao, Y; Sarkar, D				Neve, Sameer; Du, Jiang; Barhemat, Rojyar; Meng, Weina; Bao, Yi; Sarkar, Dibyendu			Valorization of Vetiver Root Biochar in Eco-Friendly Reinforced Concrete: Mechanical, Economic, and Environmental Performance	MATERIALS			English	Article						biochar; circular economy; finite element analysis; green concrete; leaching of heavy metals; reinforced concrete	ROLLER COMPACTED CONCRETE; HEAVY-METAL; WASTE; CEMENT; BEHAVIOR; REMOVAL; DESIGN	Biochar has shown great promise in producing low-cost low-carbon concrete for civil infrastructure applications. However, there is limited research comparing the use of pristine and contaminated biochar in concrete. This paper presents comprehensive laboratory experiments and three-dimensional nonlinear finite element analysis on the mechanical, economical, and environmental performance of reinfo…	[Neve, Sameer; Du, Jiang; Barhemat, Rojyar; Meng, Weina; Bao, Yi; Sarkar, Dibyendu] Stevens Inst Technol, Dept Civil Environm & Ocean Engn, Hoboken, NJ 07030 USA	Stevens Institute of Technology	Bao, Y; Sarkar, D (corresponding author), Stevens Inst Technol, Dept Civil Environm & Ocean Engn, Hoboken, NJ 07030 USA.	yi.bao@stevens.edu; dsarkar@stevens.edu	Meng, Weina/AFP-7347-2022; Bao, Yi/D-5334-2019	NEVE, SAMEER/0009-0006-6708-0414; Bao, Yi/0000-0002-2766-2077; Sarkar, Dibyendu/0000-0003-1978-1276					73	0	0	6	6	MDPI	BASEL	ST ALBAN-ANLAGE 66, CH-4052 BASEL, SWITZERLAND		1996-1944		MATERIALS	Materials	MAR	2023	16	6
J	Maljaee, H; Madadi, R; Paiva, H; Tarelho, L; Ferreira, VM				Maljaee, Hamid; Madadi, Rozita; Paiva, Helena; Tarelho, Luis; Ferreira, Victor M.			Incorporation of biochar in cementitious materials: A roadmap of biochar selection	CONSTRUCTION AND BUILDING MATERIALS			English	Review						Biochar; Cement mortar; Carbon sequestration; Concrete; Filler; Cement replacement	RUBBER-WOOD-SAWDUST; INTERNAL RELATIVE-HUMIDITY; TRANSITION ZONE ITZ; PYROLYSIS TEMPERATURE; CHEMICAL-COMPOSITION; BUILDING-MATERIALS; SLOW PYROLYSIS; SEWAGE-SLUDGE; PARTICLE-SIZE; BLACK CARBON	Increasing cement production in construction sector and waste generation in industrial sectors are of the major sources of CO2 emission. For decades, it has been the concern of environmentalists to convince constructors and researchers to find sustainable solutions targeting aforementioned problems. The attempts focused on identification of wastes to be successfully complied with construction mat…	[Maljaee, Hamid; Paiva, Helena] Univ Aveiro, CICECO Dept Civil Engn, P-3810193 Aveiro, Portugal; [Madadi, Rozita] Univ Tehran, Univ Coll Agr & Nat Resources, Dept Agr Biotechnol, Karaj, Iran; [Tarelho, Luis] Univ Aveiro, CESAM Dept Environm & Planning, P-3810193 Aveiro, Portugal; [Ferreira, Victor M.] Univ Aveiro, RISCO Dept Civil Engn, P-3810193 Aveiro, Portugal	Universidade de Aveiro; University of Tehran; Universidade de Aveiro; Universidade de Aveiro	Maljaee, H (corresponding author), Univ Aveiro, CICECO Dept Civil Engn, P-3810193 Aveiro, Portugal.	h.maljaee@ua.pt; hpaiva@ua.pt; ltarelho@ua.pt; victorf@ua.pt	Maljaee, Hamid/X-9032-2019; Tarelho, Luís AC/A-8278-2013; Madadi, Rozita/X-8341-2019; Ferreira, Victor/H-3759-2013	Maljaee, Hamid/0000-0003-1429-8621; Tarelho, Luís AC/0000-0003-0385-5621; Ferreira, Victor/0000-0002-6295-1333	EU Research and Innovation programme [730305]; Portuguese Foundation for Science and Technology (FCT)/Ministry of Science, Technology and Higher Education (MCTES) [UIDP/50017/2020+UIDB/50017/2020]	EU Research and Innovation programme; Portuguese Foundation for Science and Technology (FCT)/Ministry of Science, Technology and Higher Education (MCTES)(Fundacao para a Ciencia e a Tecnologia (FCT))	The authors would like to acknowledge the support of the H2020 EU Research and Innovation programme for the funding of the Paperchain project under grant agreement no 730305. Thanks are due to the Portuguese Foundation for Science and Technology (FCT)/Ministry of Science, Technology and Higher Education (MCTES) for the financial support to CESAM (UIDP/50017/2020+UIDB/50017/2020), through national…		151	40	42	10	87	ELSEVIER SCI LTD	OXFORD	THE BOULEVARD, LANGFORD LANE, KIDLINGTON, OXFORD OX5 1GB, OXON, ENGLAND	0950-0618	1879-0526		CONSTR BUILD MATER	Constr. Build. Mater.	MAY 10	2021	283
J	Ling, YF; Wu, XH; Tan, KH; Zou, ZJ				Ling, Yifu; Wu, Xionghua; Tan, Kanghao; Zou, Zhenjie			Effect of Biochar Dosage and Fineness on the Mechanical Properties and Durability of Concrete	MATERIALS			English	Article						biochar; cement-based materials; fineness; anti-carbonation; chloride ion resistance; mechanical strength	CEMENT; MORTAR; WASTE	Biochar (BC), a byproduct of agricultural waste pyrolysis, shows potential as a sustainable substitute material for ordinary silicate cement (OPC) in concrete production, providing opportunities for environmental sustainability and resource conservation in the construction industry. However, the optimal biochar dosage and fineness for enhancing concrete performance are still unclear. This study i…	[Ling, Yifu; Tan, Kanghao; Zou, Zhenjie] Guangxi Univ, Sch Civil Engn & Architecture, Key Lab Disaster Prevent & Engn Safety Guangxi, Nanning 530004, Peoples R China; [Wu, Xionghua] Guangxi Highway Detect Co Ltd, Nanning 530004, Peoples R China	Guangxi University	Zou, ZJ (corresponding author), Guangxi Univ, Sch Civil Engn & Architecture, Key Lab Disaster Prevent & Engn Safety Guangxi, Nanning 530004, Peoples R China.	zou5di@126.com		TAN, Kanghao/0000-0002-8922-9084; Zou, Zhenjie/0009-0003-8468-6432	high-level innovation team and outstanding scholar program of Guangxi colleges; National Natural Science Foundation of China [41561015]	high-level innovation team and outstanding scholar program of Guangxi colleges; National Natural Science Foundation of China(National Natural Science Foundation of China (NSFC))	The author would like to thank the high-level innovation team and outstanding scholar program of Guangxi colleges (granted to Yinghong Qin), the National Natural Science Foundation of China (No. 41561015).		35	0	0	8	8	MDPI	BASEL	ST ALBAN-ANLAGE 66, CH-4052 BASEL, SWITZERLAND		1996-1944		MATERIALS	Materials	APR	2023	16	7
J	Chen, L; Huang, LP; Hua, JM; Chen, ZH; Wei, LL; Osman, AI; Fawzy, S; Rooney, DW; Dong, L; Yap, PS				Chen, Lin; Huang, Lepeng; Hua, Jianmin; Chen, Zhonghao; Wei, Lilong; Osman, Ahmed I.; Fawzy, Samer; Rooney, David W.; Dong, Liang; Yap, Pow-Seng			Green construction for low-carbon cities: a review	ENVIRONMENTAL CHEMISTRY LETTERS			English	Review						Green construction; Zero-carbon building; Carbon emissions; Life cycle assessment; Sustainable materials; Net-zero carbon	LIFE-CYCLE ASSESSMENT; SELF-HEALING CONCRETE; GAS EMISSIONS; FLY-ASH; OFFICE BUILDINGS; CO2 EMISSIONS; ENERGY-CONSUMPTION; BIOCHAR; INDUSTRY; SUSTAINABILITY	The construction industry is a major user of non-renewable energy and contributor to emission of greenhouse gases, thus requiring to achieve net-zero carbon emissions by 2050. Indeed, construction activities account for 36% of global energy consumption and 39% of global carbon dioxide emissions. Reducing carbon emissions requires adapted government policies, carbon emission analysis and calculati…	[Chen, Lin; Huang, Lepeng; Hua, Jianmin; Wei, Lilong] Chongqing Univ, Sch Civil Engn, Chongqing 400045, Peoples R China; [Chen, Lin; Huang, Lepeng; Hua, Jianmin; Wei, Lilong] Chongqing Univ, Key Lab New Technol Construct Cities Mt Area, Minist Educ, Chongqing 400045, Peoples R China; [Chen, Zhonghao; Yap, Pow-Seng] Xian Jiaotong Liverpool Univ, Dept Civil Engn, Suzhou 215123, Peoples R China; [Os…	Chongqing University; Chongqing University; Xi'an Jiaotong-Liverpool University; Queens University Belfast; City University of Hong Kong; City University of Hong Kong; City University of Hong Kong	Hua, JM (corresponding author), Chongqing Univ, Sch Civil Engn, Chongqing 400045, Peoples R China.;Hua, JM (corresponding author), Chongqing Univ, Key Lab New Technol Construct Cities Mt Area, Minist Educ, Chongqing 400045, Peoples R China.;Yap, PS (corresponding author), Xian Jiaotong Liverpool Univ, Dept Civil Engn, Suzhou 215123, Peoples R China.;Osman, AI (corresponding author), Queens Univ B…	hjm191@163.com; aosmanahmed01@qub.ac.uk; liadong@cityu.edu.hk; PowSeng.Yap@xjtlu.edu.cn	Dong, Liang/IAR-4638-2023; Chen, Zhonghao/GZL-6070-2022; Rooney, David/B-6035-2015; Yap, PS/S-6115-2017; huang, lepeng/ABA-8842-2020	Chen, Zhonghao/0000-0002-7056-9222; Rooney, David/0000-0001-5036-2497; Dong, Liang/0000-0001-9747-5851	Bryden Centre project [VA5048]; European Union	Bryden Centre project; European Union(European Union (EU))	Dr Ahmed I. Osman wishes to acknowledge the support of The Bryden Centre project (Project ID VA5048). The Bryden Centre project is supported by the European Union's INTER-REG VA Programme, managed by the Special EU Programmes Body (SEUPB).		184	6	6	132	140	SPRINGER HEIDELBERG	HEIDELBERG	TIERGARTENSTRASSE 17, D-69121 HEIDELBERG, GERMANY	1610-3653	1610-3661		ENVIRON CHEM LETT	Environ. Chem. Lett.	JUN	2023	21	3
J	Zeidabadi, ZA; Bakhtiari, S; Abbaslou, H; Ghanizadeh, AR				Zeidabadi, Zahra Asadi; Bakhtiari, Somayeh; Abbaslou, Hakime; Ghanizadeh, Ali Reza			Synthesis, characterization and evaluation of biochar from agricultural waste biomass for use in building materials	CONSTRUCTION AND BUILDING MATERIALS			English	Article						Green concrete; Biochar; Rice husk; Bagasse	RICE HUSK ASH; HYDROCHLORIC-ACID PRETREATMENT; HIGH-PERFORMANCE CONCRETE; OIL PALM SHELL; MECHANICAL-PROPERTIES; GREEN CONCRETE; FUEL ASH; FLY-ASH; SILICA; FIBER	Cement is a critical material for urbanization and its production is responsible for most of the CO2 emissions in the world. The use of substances capable of substituting the material responsible for greenhouse gases can reduce global warming, which is caused by the emission of greenhouse gases into the atmosphere, especially CO2. Among such materials is agricultural waste ash which has been foun…	[Zeidabadi, Zahra Asadi; Bakhtiari, Somayeh; Abbaslou, Hakime; Ghanizadeh, Ali Reza] Sirjan Univ Technol, Dept Civil Engn, Sirjan, Iran		Bakhtiari, S (corresponding author), Sirjan Univ Technol, Dept Civil Engn, Sirjan, Iran.	bakhtiari@sirjantech.ac.ir	Ghanizadeh, Ali Reza/Q-7039-2019; Abbaslou, H./T-8395-2017	Ghanizadeh, Ali Reza/0000-0002-6618-1049; Abbaslou, Hanie/0000-0002-4675-7389					31	68	69	13	79	ELSEVIER SCI LTD	OXFORD	THE BOULEVARD, LANGFORD LANE, KIDLINGTON, OXFORD OX5 1GB, OXON, ENGLAND	0950-0618	1879-0526		CONSTR BUILD MATER	Constr. Build. Mater.	AUG 30	2018	181
J	Kuhn, DC; Cabral, LL; Pereira, IC; Goncalves, AJ; Maciel, GM; Haminiuk, CWI; Nagalli, A; Passig, FH; de Carvalho, KQ				Kuhn, Daiane Cristine; Cabral, Lucas Lacerda; Pereira, Izadora Consalter; Goncalves, Alexandre Jose; Maciel, Giselle Maria; Haminiuk, Charles Windson Isidoro; Nagalli, Andre; Passig, Fernando Hermes; de Carvalho, Karina Querne			Development of aerated concrete waste/white cement composite for phosphate adsorption from aqueous solutions: Characterization and modeling studies	CHEMICAL ENGINEERING AND PROCESSING-PROCESS INTENSIFICATION			English	Article						Autoclaved concrete chemically activated; Phosphate adsorption and desorption; Optimization; Isotherms; Ion exchange; Reuse	PHOSPHORUS REMOVAL; MAGNETIC BIOCHAR; SURFACE-AREA; WASTE-WATER; DYE; OXIDE; BRICK; REGENERATION; EQUILIBRIUM; ACTIVATION	Adsorbing phosphate (PO4-3) from aqueous solutions onto concrete-based construction waste represents a low-cost, nontoxic, and sustainable technique. The novelty of this paper focuses on the adsorption and desorption of PO4-3 from aqueous solutions using autoclaved concrete (AC) chemically activated with white cement (AAC), representing an innovative adsorbent. Pseudo-second-order model better re…	[Kuhn, Daiane Cristine; Pereira, Izadora Consalter; Goncalves, Alexandre Jose] Fed Univ Technol Parana UTFPR, Civil Engn Grad Program, Deputado Heitor Alencar Furtado St 5000, BR-81280340 Curitiba, Parana, Brazil; [Cabral, Lucas Lacerda] Fed Univ Technol Parana UTFPR, Environm Sci & Technol Grad Program, Deputado Heitor Alencar Furtado St 5000, BR-81280340 Curitiba, Parana, Brazil; [Maciel, Gisel…	Universidade Tecnologica Federal do Parana; Universidade Tecnologica Federal do Parana; Universidade Tecnologica Federal do Parana; Universidade Tecnologica Federal do Parana	de Carvalho, KQ (corresponding author), Fed Univ Technol Parana UTFPR, Civil Construct Acad Dept, Deputado Heitor Alencar Furtado St 5000, BR-81280340 Curitiba, Parana, Brazil.	daianekuhn@alunos.utfpr.edu.br; lucascabral@alunos.utfpr.edu.br; izadorapereira@alunos.utfpr.edu.br; alejg@utfpr.edu.br; gmmaciel@utfpr.edu.br; haminiuk@utfpr.edu.br; nagalli@utfpr.edu.br; fhpassig@utfpr.edu.br; kaquerne@utfpr.edu.br			Coordination for the Improvement of Higher Education Personnel (CAPES) [001]	Coordination for the Improvement of Higher Education Personnel (CAPES)(Coordenacao de Aperfeicoamento de Pessoal de Nivel Superior (CAPES))	To the support of the Coordination for the Improvement of Higher Education Personnel (CAPES) [Finance Code 001] ; Ph.D Professor Julio Klein das Neves (on behalf of CMCM-UTFPR) for providing the SEM, EDS and XRD analysis; Ph.D Professor Jose ? Alberto Cerri (on behalf of NPT- UTFPR) for providing FRX, mercury intrusion porosimetry, helium picnometry, granulometric, and TG and DTG analysis; and Ph…		94	2	2	4	4	ELSEVIER SCIENCE SA	LAUSANNE	PO BOX 564, 1001 LAUSANNE, SWITZERLAND	0255-2701	1873-3204		CHEM ENG PROCESS	Chem. Eng. Process.	FEB	2023	184
J	Lin, A; Tan, YK; Wang, CH; Kua, HW; Taylor, H				Lin, Alexander; Tan, Yu Kiat; Wang, Chi-Hwa; Kua, Harn Wei; Taylor, Hayden			Utilization of waste materials in a novel mortar-polymer laminar composite to be applied in construction 3D-printing	COMPOSITE STRUCTURES			English	Article						3D printing; Reinforcement; Concrete; Polymer; Biochar; Fly ash	ASH BASED GEOPOLYMER; FLY-ASH; CONCRETE; BIOCHAR; EXTRUSION; REINFORCEMENT; PERFORMANCE; FRESH	3D printing of cementitious materials is gaining attention in the construction industry. However, convenient methods are needed for integrating reinforcement into 3D-printed concrete. This paper demonstrates the mechanical enhancement offered by a novel form of mortar-polymer laminar composite. The polymer reinforcement is itself extrusion 3D-printed as lattice-like sheets, which are interlaced w…	[Lin, Alexander; Tan, Yu Kiat; Kua, Harn Wei] Natl Univ Singapore, Sch Design & Environm, Dept Bldg, 4 Architecture Dr, Singapore 117566, Singapore; [Wang, Chi-Hwa] Natl Univ Singapore, Dept Chem & Biomol Engn, 4 Engn Dr 4, Singapore 117585, Singapore; [Taylor, Hayden] Dept Mech Engn, 6159 Etcheverry Hall, Berkeley, CA 94720 USA; [Taylor, Hayden] Berkeley Educ Alliance Res Singapore, 11-01 CREATE…	National University of Singapore; National University of Singapore	Taylor, H (corresponding author), Natl Univ Singapore, Sch Design & Environm, Dept Bldg, 4 Architecture Dr, Singapore 117566, Singapore.;Kua, HW (corresponding author), Univ Calif Berkeley, Dept Mech Engn, 6159 Etcheverry Hall, Berkeley, CA 94720 USA.	bdgkuahw@nus.edu.sg; hkt@berkeley.edu		Lin, Alexander/0000-0002-3773-7503	National Research Foundation, Prime Minister's Office, Singapore under its IntraCREATE Seed Grant programme [NRF2016-ITS001-018]; Singapore-Berkeley Building Efficiency and Sustainability in the Tropics (SinBerBEST) program	National Research Foundation, Prime Minister's Office, Singapore under its IntraCREATE Seed Grant programme; Singapore-Berkeley Building Efficiency and Sustainability in the Tropics (SinBerBEST) program	This work was supported by the National Research Foundation, Prime Minister's Office, Singapore under its IntraCREATE Seed Grant programme, grant NRF2016-ITS001-018, and its Singapore-Berkeley Building Efficiency and Sustainability in the Tropics (SinBerBEST) program. The authors declare no conflicts of interest.		42	20	20	7	73	ELSEVIER SCI LTD	OXFORD	THE BOULEVARD, LANGFORD LANE, KIDLINGTON, OXFORD OX5 1GB, OXON, ENGLAND	0263-8223	1879-1085		COMPOS STRUCT	Compos. Struct.	DEC 1	2020	253
J	Wen, D; Chang, NB; Wanielista, MP				Wen, Dan; Chang, Ni-Bin; Wanielista, Martin P.			Assessing Nutrient Removal in Stormwater Runoff for Urban Farming with Iron filings-based Green Environmental Media	SCIENTIFIC REPORTS			English	Article							ZERO-VALENT IRON; PHOSPHORUS REMOVAL; ENHANCED NITRATE; WATER; SELECTIVITY; ADSORPTION; REDUCTION; PHOSPHATE; NITROGEN; BIOCHAR	Ensuring urban areas have access to clean drinking water, safe food supply, and uncontaminated water bodies is essential to the good health of millions of urban residents. This paper presents the functionality of Iron Filings-based Green Environmental Media (IFGEM) in terms of nutrient removal efficiencies to support water quality management and urban farming. IFGEM uses recycled materials such a…	[Wen, Dan; Chang, Ni-Bin; Wanielista, Martin P.] Univ Cent Florida, Dept Civil Environm & Construct Engn, Orlando, FL 32816 USA	State University System of Florida; University of Central Florida	Chang, NB (corresponding author), Univ Cent Florida, Dept Civil Environm & Construct Engn, Orlando, FL 32816 USA.	nchang@ucf.edu			National Science Foundation [ICER 1830036]; Florida Department of Transportation in the United States [BDV24 977-25]	National Science Foundation(National Science Foundation (NSF)); Florida Department of Transportation in the United States	The authors acknowledge the financial support of the Grant from the National Science Foundation (Award ID: ICER 1830036) and the Florida Department of Transportation (Grant No. BDV24 977-25) in the United States. The opinions, findings and conclusions expressed in this publication are those of the author(s) and not necessarily those of the Florida Department of Transportation or the U.S. Departme…		42	7	7	1	19	NATURE PUBLISHING GROUP	LONDON	MACMILLAN BUILDING, 4 CRINAN ST, LONDON N1 9XW, ENGLAND	2045-2322			SCI REP-UK	Sci Rep	JUN 10	2020	10	1
J	Pokorny, J; Sevcik, R; Zarybnicka, L; Podolka, L				Pokorny, Jaroslav; Sevcik, Radek; Zarybnicka, Lucie; Podolka, Lubos			The Role of High Carbon Additives on Physical-Mechanical Characteristics and Microstructure of Cement-Based Composites	BUILDINGS			English	Article						biochar; cement paste; cement production; coal dust; compressive strength; high carbon additive	MINERAL ADMIXTURE; PORTLAND-CEMENT; WOOD WASTE; COAL; ASH; BIOCHAR; PERFORMANCE; EMISSIONS; HYDRATION; CONCRETE	Traditional supplementary cementitious materials (SCMs) have been proven to reduce the negative impact of Portland cement production on the environment. However, the availability of SCMs becomes limited due to their extensive usage. For this reason, our work aimed to investigate the effect of partial substitution of ordinary Portland cement (OPC) with two different types of carbon-rich waste powd…	[Pokorny, Jaroslav; Sevcik, Radek; Podolka, Lubos] Inst Technol & Business, Fac Technol, Dept Civil Engn, Okruzni 517-10, Ceske Budejovice 37001, Czech Republic; [Sevcik, Radek; Zarybnicka, Lucie] Czech Acad Sci, Inst Theoret & Appl Mech, Prosecka 809-76, Prague 19000, Czech Republic	Institute of Technology & Business, Ceske Budejovice; Czech Academy of Sciences; Institute of Theoretical & Applied Mechanics of the Czech Academy of Sciences	Pokorny, J (corresponding author), Inst Technol & Business, Fac Technol, Dept Civil Engn, Okruzni 517-10, Ceske Budejovice 37001, Czech Republic.	jaroslav.pokorny@mail.vstecb.cz; sevcik@itam.cas.cz; zarybnicka@itam.cas.cz; podolka@mail.vstecb.cz			Institute of Technology and Business [03SVV2325]; Czech Academy of Sciences, Institute of Theoretical and Applied Mechanics [RVO 68378297]	Institute of Technology and Business; Czech Academy of Sciences, Institute of Theoretical and Applied Mechanics	This research was funded by the Institute of Technology and Business, under project No. 03SVV2325, and the Czech Academy of Sciences, Institute of Theoretical and Applied Mechanics-RVO 68378297.		57	0	0	0	0	MDPI	BASEL	ST ALBAN-ANLAGE 66, CH-4052 BASEL, SWITZERLAND		2075-5309		BUILDINGS-BASEL	BUILDINGS-BASEL	JUL	2023	13	7
J	Huang, XL; Niu, RJ; Huang, XL; An, YX; Li, JH; Li, MQ; Huang, H; Garg, A				Huang, Xilong; Niu, Renjie; Huang, Xiaoli; An, Yongxue; Li, Junhao; Li, Manqi; Huang, He; Garg, Ankit			Influence of Sustainable Biochars Produced from Kitchen Waste, Pig Manure, and Wood on Soil Erosion	WATER			English	Article						biochar; biochar-amended soil; flume test; soil erosion; runoff; infiltration	CLIMATE-CHANGE IMPACTS; WATER-RETENTION; SEAL FORMATION; RAINFALL SIMULATION; ORGANIC-MATTER; BLACK CARBON; INFILTRATION; MANAGEMENT; RUNOFF; LAND	The influence of biochars on water retention, mitigating nutrient leaching, and pollutant removal in green infrastructure has been explored in the past. However, there is a lack of understanding on how feedstock (i.e., biomass) would affect biochar physicochemical properties and hence, overall erosion control (including infiltration, surface, and sub-surface runoff) in green infrastructure. The m…	[Huang, Xilong; Niu, Renjie; Huang, Xiaoli; An, Yongxue; Li, Junhao; Li, Manqi; Huang, He; Garg, Ankit] Shantou Univ, Dept Civil & Environm Engn, Shantou 515063, Peoples R China; [Huang, Xilong; Niu, Renjie; Huang, Xiaoli; An, Yongxue; Li, Junhao; Li, Manqi; Huang, He; Garg, Ankit] Guangdong Engn Ctr Struct Safety & Hlth Monitorin, Shantou 515063, Peoples R China	Shantou University	Garg, A (corresponding author), Shantou Univ, Dept Civil & Environm Engn, Shantou 515063, Peoples R China.;Garg, A (corresponding author), Guangdong Engn Ctr Struct Safety & Hlth Monitorin, Shantou 515063, Peoples R China.	18xlhuang1@stu.edu.cn; 18rjniu@stu.edu.cn; 19xlhuang1@stu.edu.cn; 19yxan@stu.edu.cn; 19jhli4@stu.edu.cn; 18mqli3@stu.edu.cn; 18hhuang2@stu.edu.cn; ankit@stu.edu.cn	Huang, He/IYS-5710-2023; Li, Junhao/E-5751-2017; garg, ankit/AAH-9210-2019	garg, ankit/0000-0001-5377-8519	National Natural Science Foundation of China [41907252]	National Natural Science Foundation of China(National Natural Science Foundation of China (NSFC))	The research was funded by the National Natural Science Foundation of China, grant number 41907252.		85	3	3	7	37	MDPI	BASEL	ST ALBAN-ANLAGE 66, CH-4052 BASEL, SWITZERLAND		2073-4441		WATER-SUI	Water	AUG	2021	13	16
J	Ulrich, BA; Vignola, M; Edgehouse, K; Werner, D; Higgins, CP				Ulrich, Bridget A.; Vignola, Marta; Edgehouse, Katelynn; Werner, David; Higgins, Christopher P.			Organic Carbon Amendments for Enhanced Biological Attenuation of Trace Organic Contaminants in Biochar-Amended Stormwater Biofilters	ENVIRONMENTAL SCIENCE & TECHNOLOGY			English	Article							INFILTRATION SYSTEMS; URBAN STORMWATER; BLACK CARBON; SOIL; DEGRADATION; BIODEGRADATION; TOXICITY; REMOVAL; RUNOFF; MATTER	This study sought to evaluate how dissolved organic carbon (DOC) affects attenuation of trace organic contaminants (TOrCs) in biochar-amended stormwater biofilters. It was hypothesized that (1) DOC-augmented runoff would demonstrate enhanced TOrC biodegradation and (2) biochar-amended sand bearing DOC-cultivated biofilms would achieve enhanced TOrC attenuation due to sorptive retention and biodeg…	[Ulrich, Bridget A.; Edgehouse, Katelynn; Higgins, Christopher P.] Colorado Sch Mines, ReNUWIt Engn Res Ctr, Golden, CO 80401 USA; [Ulrich, Bridget A.; Edgehouse, Katelynn; Higgins, Christopher P.] Colorado Sch Mines, Dept Civil & Environm Engn, Golden, CO 80401 USA; [Vignola, Marta; Werner, David] Newcastle Univ, Sch Civil Engn & Geosci, Newcastle Upon Tyne NE1 7RU, Tyne & Wear, England; [Edgeho…	Colorado School of Mines; Colorado School of Mines; N8 Research Partnership; Newcastle University - UK; University System of Ohio; Cleveland State University	Higgins, CP (corresponding author), Colorado Sch Mines, ReNUWIt Engn Res Ctr, Golden, CO 80401 USA.;Higgins, CP (corresponding author), Colorado Sch Mines, Dept Civil & Environm Engn, Golden, CO 80401 USA.	chiggins@mines.edu	Higgins, Christopher P/B-1836-2010; Edgehouse, Katelynn/ABB-2600-2021	Higgins, Christopher P/0000-0001-6220-8673; Edgehouse, Katelynn/0000-0003-0910-8723; Werner, David/0000-0002-6741-1256; Vignola, Marta/0000-0002-3457-5748	National Science Foundation [DGE-1057607, EEC-1028968, EEC-1262655]; EPSRC grant [EP/K021737/1]; Marie Sklodowska-Curie Initial Training Network (MERMAID) [607492]; Engineering and Physical Sciences Research Council [EP/K021737/1] Funding Source: researchfish; EPSRC [EP/K021737/1] Funding Source: UKRI	National Science Foundation(National Science Foundation (NSF)); EPSRC grant(UK Research & Innovation (UKRI)Engineering & Physical Sciences Research Council (EPSRC)); Marie Sklodowska-Curie Initial Training Network (MERMAID); Engineering and Physical Sciences Research Council(UK Research & Innovation (UKRI)Engineering & Physical Sciences Research Council (EPSRC)); EPSRC(UK Research & Innovation (U…	This material is based upon work supported by the National Science Foundation Graduate Research Fellowship under Grant DGE-1057607 and the National Science Foundation Engineering Research Center Program under Cooperative Agreements EEC-1028968 (ReNUWIt) and EEC-1262655. Collaboration with Newcastle University on 16S rRNA gene quantification and sequencing was facilitated by EPSRC grant EP/K021737…		57	38	38	3	106	AMER CHEMICAL SOC	WASHINGTON	1155 16TH ST, NW, WASHINGTON, DC 20036 USA	0013-936X	1520-5851		ENVIRON SCI TECHNOL	Environ. Sci. Technol.	AUG 15	2017	51	16
J	Varela, A; Sandoval-Alban, A; Munoz, M; Gomez, AG; Bogoya, JM; Combariza, G				Varela, Amanda; Sandoval-Alban, Alexandra; Munoz, Marcela; Gomez Gomez, Alfonso; Manuel Bogoya, Johan; Combariza, German			Evaluation of green roof structures and substrates for Lactuca sativa L. in tropical conditions	URBAN FORESTRY & URBAN GREENING			English	Article						Biochar; Compost; Microbial functional groups; Physicochemical properties; Urban agriculture		Different types of structures and substrates are used for urban extensive green roofs. However, there is not enough information about the performance of these structures and substrates for growing edible plants in tropical climate conditions. This study evaluates the best combination of three different modular extensive green roof structures and two types of local substrates (compost and soil + b…	[Varela, Amanda; Sandoval-Alban, Alexandra; Munoz, Marcela] Pontificia Univ Javeriana, Lab Ecol Suelos & Hongos Trop LESYHT, Unidad Ecol & Sistemat UNESIS, Dept Biol,Fac Ciencias, Carrera 7 43-82, Bogota, DC, Colombia; [Gomez Gomez, Alfonso] Pontificia Univ Javeriana, Grp Invest Mat Estruct & Tecnol GRIMET, Dept Arquitectura, Fac Arquitectura & Diseno, Carrera 7 40-62, Bogota, DC, Colombia; [Manu…	Pontificia Universidad Javeriana; Pontificia Universidad Javeriana; Pontificia Universidad Javeriana	Varela, A (corresponding author), Pontificia Univ Javeriana, Lab Ecol Suelos & Hongos Trop LESYHT, Unidad Ecol & Sistemat UNESIS, Dept Biol,Fac Ciencias, Carrera 7 43-82, Bogota, DC, Colombia.	avarela@javeriana.edu.co; alexandra.sandoval@javeriana.edu.co; leyla.munoz@javeriana.edu.co; alfonso.gomez@javeriana.edu.co; johanbogoya@gmail.com; german.combarizag@konradlorenz.edu.co	Bogoya, Johan Manuel/AAG-1451-2019	Bogoya, Johan Manuel/0000-0003-3551-8152; Gomez, Alfonso/0000-0003-1099-7986	Vicerrectoria de Investigacion at Pontificia Universidad Javeriana (Bogota D.C.) [5517]	Vicerrectoria de Investigacion at Pontificia Universidad Javeriana (Bogota D.C.)	We thank to Vicerrectoria de Investigacion at Pontificia Universidad Javeriana (Bogota D.C.) for financial support through project No. 5517. To Fundacion Escuela Taller de Bogota for providing study site. Also, to Efrain Becerra and Alvaro Perdomo for their technical support; to Jairo Perez-Torres and two revieweres for helping to improve the article.		73	5	5	2	17	ELSEVIER GMBH	MUNICH	HACKERBRUCKE 6, 80335 MUNICH, GERMANY	1618-8667	1610-8167		URBAN FOR URBAN GREE	Urban For. Urban Green.	MAY	2021	60
J	Amjad, H; Khushnood, RA; Memon, SA				Amjad, Hassan; Khushnood, Rao Arsalan; Memon, Shazim Ali			Biomimetic robust self-healing of Bacillus Subtilis immobilized through sisal fiber for next-generation concrete infrastructure	CONSTRUCTION AND BUILDING MATERIALS			English	Article						Self -healing concrete; Bacillus Subtilis; Sisal fiber; Autonomous healing; Rigor healing; Multiple damages	REINFORCED CONCRETE; NATURAL FIBERS; CHROMITE MINE; BACTERIA; STRENGTH; BIOCHAR; IMPACT; NANO	Bio-healing is now believed as a promising technique for the repair of concrete cracks. However, the healing capability of bacterial mixes against repeated damage cycles is still questionable. This study aims to investigate the robustness of bio-healable concrete against two successive damage cycles using Bacillus Subtilis immobilized via sisal fiber. The formulated bio-concrete exhibited improve…	[Amjad, Hassan; Khushnood, Rao Arsalan] Natl Univ Sci & Technol NUST, NUST Inst Civil Engn NICE, Sch Civil & Environm Engn SCEE, H-12 Campus, Islamabad 44000, Pakistan; [Memon, Shazim Ali] Nazarbayev Univ, Sch Engn & Digital Sci, Dept Civil & Environm Engn, Nur Sultan 010000, Kazakhstan	National University of Sciences & Technology - Pakistan; Nazarbayev University	Khushnood, RA (corresponding author), Natl Univ Sci & Technol NUST, NUST Inst Civil Engn NICE, Sch Civil & Environm Engn SCEE, H-12 Campus, Islamabad 44000, Pakistan.	arsalan.khushnood@nice.nust.edu.pk		Amjad, Hassan/0000-0003-2271-9051; Memon, Shazim/0000-0001-6625-8811					94	2	2	45	45	ELSEVIER SCI LTD	OXFORD	THE BOULEVARD, LANGFORD LANE, KIDLINGTON, OXFORD OX5 1GB, OXON, ENGLAND	0950-0618	1879-0526		CONSTR BUILD MATER	Constr. Build. Mater.	MAR 3	2023	368
J	Chen, L; Zhang, YY; Wang, L; Ruan, SQ; Chen, JF; Li, HY; Yang, J; Mechtcherine, V; Tsang, DCW				Chen, Liang; Zhang, Yuying; Wang, Lei; Ruan, Shaoqin; Chen, Junfeng; Li, Huanyu; Yang, Jian; Mechtcherine, Viktor; Tsang, Daniel C. W.			Biochar-augmented carbon-negative concrete	CHEMICAL ENGINEERING JOURNAL			English	Article						Engineered biochar; Carbon neutrality; Sustainable waste management; Life cycle assessment; Eco-friendly construction materials; Circular economy	SUPPLEMENTARY CEMENTITIOUS MATERIALS; LIFE-CYCLE ASSESSMENT; LCA; TEMPERATURE; SYSTEMS; SILICA	Biochar is a waste-derived carbon-based material that can sequester carbon. This study proposed a revolutionary design of carbon-negative concrete with a large volume of biochar incorporation and elaborated the roles of biochar in the cement hydration and microstructure development of biochar-augmented concrete. The total CO2 emissions and economic values of biochar-augmented concrete were, for t…	[Chen, Liang; Zhang, Yuying; Tsang, Daniel C. W.] Hong Kong Polytechn Univ, Dept Civil & Environm Engn, Hung Hom, Kowloon, Hong Kong, Peoples R China; [Chen, Liang; Zhang, Yuying; Tsang, Daniel C. W.] Hong Kong Polytechn Univ, Res Ctr Resources Engn Carbon Neutral, Hung Hom, Kowloon, Hong Kong, Peoples R China; [Wang, Lei; Li, Huanyu; Mechtcherine, Viktor] Tech Univ Dresden, Inst Construct Mat, D…	Hong Kong Polytechnic University; Hong Kong Polytechnic University; Technische Universitat Dresden; Zhejiang University; Wuhan University of Science & Technology; Shanghai Jiao Tong University	Tsang, DCW (corresponding author), Hong Kong Polytechn Univ, Dept Civil & Environm Engn, Hung Hom, Kowloon, Hong Kong, Peoples R China.;Wang, L (corresponding author), Tech Univ Dresden, Inst Construct Mat, D-01062 Dresden, Germany.	lei.wang1@mailbox.tu-dresden.de; dan.tsang@polyu.edu.hk	Mechtcherine, Viktor/AAS-7113-2020; WANG, Lei/C-8138-2018; Mechtcherine, Viktor/HKE-4108-2023; Tsang, Dan/E-5442-2012; Li, Huanyu/AAW-9297-2020; Chen, Liang/AAU-4046-2021; Cuadrado, Glenda/HNJ-6380-2023	Mechtcherine, Viktor/0000-0002-4685-7064; WANG, Lei/0000-0002-0336-7241; Tsang, Dan/0000-0002-6850-733X; Li, Huanyu/0000-0003-1771-1725; Chen, Liang/0000-0003-3161-1923; Yang, Jian/0000-0002-3390-5127; Ruan, Shaoqin/0000-0002-6172-9247	Hong Kong Green Tech Fund [GTF202020153]; Alexander von Humboldt Foundation, Germany (AvH); University Research Facility on Chemical and Environmental Analysis (URFCE) of PolyU	Hong Kong Green Tech Fund; Alexander von Humboldt Foundation, Germany (AvH)(Alexander von Humboldt Foundation); University Research Facility on Chemical and Environmental Analysis (URFCE) of PolyU	The authors appreciate the financial support from the Hong Kong Green Tech Fund (GTF202020153) and Alexander von Humboldt Foundation, Germany (AvH) . The authors also gratefully acknowledge the support of the University Research Facility on Chemical and Envi-ronmental Analysis (URFCE) of PolyU.		47	39	41	53	117	ELSEVIER SCIENCE SA	LAUSANNE	PO BOX 564, 1001 LAUSANNE, SWITZERLAND	1385-8947	1873-3212		CHEM ENG J	Chem. Eng. J.	MAR 1	2022	431		1
J	Roychand, R; Patel, S; Halder, P; Kundu, S; Hampton, J; Bergmann, D; Surapaneni, A; Shah, KL; Pramanik, BK				Roychand, Rajeev; Patel, Savankumar; Halder, Pobitra; Kundu, Sazal; Hampton, James; Bergmann, David; Surapaneni, Aravind; Shah, Kalpit; Pramanik, Biplob Kumar			Recycling biosolids as cement composites in raw, pyrolyzed and ashed forms: A waste utilisation approach to support circular economy	JOURNAL OF BUILDING ENGINEERING			English	Article						Biosolids; Biochar; Bioash; Cement replacement; Pyrolysis		Ongoing management of biosolids has emerged as a major economic challenge for wastewater treatment facilities around the world. To tackle this challenge, it becomes imperative for the researcher community to identify various applications for this waste material, simultaneously supporting the government's closed-loop circular economy initiative. This research investigates the use of biosolids in r…	[Roychand, Rajeev; Patel, Savankumar; Halder, Pobitra; Kundu, Sazal; Shah, Kalpit; Pramanik, Biplob Kumar] RMIT Univ, Sch Engn, Melbourne, Vic 3000, Australia; [Hampton, James; Bergmann, David; Surapaneni, Aravind] South East Water, Frankston, Vic 3199, Australia; [Surapaneni, Aravind; Shah, Kalpit] RMIT Univ, ARC Training Ctr Adv Transformat Australias Bioso, Bundoora, Vic 3083, Australia	Royal Melbourne Institute of Technology (RMIT); Royal Melbourne Institute of Technology (RMIT)	Roychand, R; Pramanik, BK (corresponding author), RMIT Univ, Sch Engn, Melbourne, Vic 3000, Australia.	rajeev.roychand@rmit.edu.au; biplob.pramanik@rmit.edu.au	Halder, Pobitra/AAH-4001-2020	Halder, Pobitra/0000-0002-7638-8836; Roychand, Rajeev/0000-0001-9457-1602	South East Water Corporation (Victoria, Australia)	South East Water Corporation (Victoria, Australia)	The authors would like to thank South East Water Corporation (Victoria, Australia) for funding this research. The authors fully acknowledge the technical support provided by the Civil, Rheology and material characterization, Microscopy & microanalysis, and the Xray diffraction facilities at RMIT University.		68	15	15	3	14	ELSEVIER	AMSTERDAM	RADARWEG 29, 1043 NX AMSTERDAM, NETHERLANDS		2352-7102		J BUILD ENG	J. Build. Eng.	JUN	2021	38
J	Liu, JQ; Garg, A; Wang, H; Huang, S; Mei, GX				Liu, Jiaqin; Garg, Ankit; Wang, Hao; Huang, Shan; Mei, Guoxiong			Moisture management in biochar-amended green roofs planted with Ophiopogon japonicus under different irrigation schemes: an integrated experimental and modeling approach	ACTA GEOPHYSICA			English	Article						Biochar; Green roof; Irrigation scheme; HYDRUS-1D; Moisture content	HYDRAULIC CONDUCTIVITY; EVAPORATION METHOD; WATER-RETENTION; SOIL; BEHAVIOR; IMPACT; PERFORMANCE; GROWTH; ENERGY; DEPTH	Green roof constantly suffers from the water stress that is developed during prolonged drought seasons. In general, periodical irrigation is required to ensure plant growth and hence serviceability of green roofs. Biochar, a carbon sink material, has been proposed as a substrate amendment in green roofs for enhancing water retention ability of soils. This study aims to conduct an assessment of th…	[Liu, Jiaqin; Huang, Shan; Mei, Guoxiong] Guangxi Univ, Coll Civil Engn & Architecture, Nanning, Guangxi, Peoples R China; [Liu, Jiaqin; Huang, Shan; Mei, Guoxiong] Guangxi Univ, Key Lab Disaster Prevent & Struct Safety, Minist Educ, Nanning, Guangxi, Peoples R China; [Liu, Jiaqin; Huang, Shan; Mei, Guoxiong] Key Lab Disaster Prevent & Mitigat & Engn Safety, Nanning, Guangxi, Peoples R China; [Ga…	Guangxi University; Guangxi University; Shantou University; Harbin Institute of Technology	Mei, GX (corresponding author), Guangxi Univ, Coll Civil Engn & Architecture, Nanning, Guangxi, Peoples R China.;Mei, GX (corresponding author), Guangxi Univ, Key Lab Disaster Prevent & Struct Safety, Minist Educ, Nanning, Guangxi, Peoples R China.;Mei, GX (corresponding author), Key Lab Disaster Prevent & Mitigat & Engn Safety, Nanning, Guangxi, Peoples R China.	1361656074@qq.com; ankit@stu.edu.cn; wanghao20182021@163.com; hsgxu@st.gxu.edu.cn; meiguox@163.com	Wang, Hao/GVU-2389-2022; garg, ankit/AAH-9210-2019	garg, ankit/0000-0001-5377-8519	National Natural Science Foundation of China [52178321, 52168046]; Innovative Research Team Program of Guangxi Natural Science Foundation [2016GXNSFGA380008]	National Natural Science Foundation of China(National Natural Science Foundation of China (NSFC)); Innovative Research Team Program of Guangxi Natural Science Foundation	The authors would like to express their sincere gratitude to National Natural Science Foundation of China (Grant Nos. 52178321 and 52168046) and Innovative Research Team Program of Guangxi Natural Science Foundation (Grant No. 2016GXNSFGA380008) for support.		53	9	9	5	16	SPRINGER INT PUBL AG	CHAM	GEWERBESTRASSE 11, CHAM, CH-6330, SWITZERLAND	1895-6572	1895-7455		ACTA GEOPHYS	Acta Geophys.	FEB	2022	70	1
J	Gan, L; Garg, A; Huang, S; Wang, J; Mei, GX; Zhang, KX				Gan, Lin; Garg, Ankit; Huang, Shan; Wang, Jun; Mei, Guoxiong; Zhang, Kexin			Experimental and numerical investigation on rainwater management of dual substrate layer green roofs using biochar-amended soil	BIOMASS CONVERSION AND BIOREFINERY			English	Article; Early Access						Biochar; Green roof; Hydraulic properties; Numerical simulation; Peak outflow reduction	RUNOFF WATER QUANTITY; HYDROLOGICAL PERFORMANCE; GAS-PERMEABILITY; SHEAR-STRENGTH; RETENTION; CLAY; INFILTRATION; SUCTION; VEGETATION; MECHANISM	Biochar is one of the potential amendment materials in green roofs. The previous studies concentrate on the single layer green roof using biochar-amended substrate. The influence of biochar in green roof amended with dual layer of substrate is rarely studied. This study is aimed to evaluate the rainwater management of dual substrate layer green roof using biochar amended soil. Four biochar-amende…	[Gan, Lin; Huang, Shan; Wang, Jun; Mei, Guoxiong; Zhang, Kexin] Guangxi Univ, Coll Civil Engn & Architecture, Nanning, Guangxi, Peoples R China; [Gan, Lin; Huang, Shan; Wang, Jun; Mei, Guoxiong; Zhang, Kexin] Guangxi Univ, Key Lab Disaster Prevent & Struct Safety, Minist Educ, Nanning, Guangxi, Peoples R China; [Gan, Lin; Huang, Shan; Wang, Jun; Mei, Guoxiong; Zhang, Kexin] Key Lab Disaster Preve…	Guangxi University; Guangxi University; Shantou University	Mei, GX (corresponding author), Guangxi Univ, Coll Civil Engn & Architecture, Nanning, Guangxi, Peoples R China.;Mei, GX (corresponding author), Guangxi Univ, Key Lab Disaster Prevent & Struct Safety, Minist Educ, Nanning, Guangxi, Peoples R China.;Mei, GX (corresponding author), Key Lab Disaster Prevent & Mitigat & Engn Safety, Nanning, Guangxi, Peoples R China.	1910391017@st.gxu.edu.cn; ankit@stu.edu.cn; hsgxu@st.gxu.edu.cn; 522408472@qq.com; meiguox@163.com; 511092432@qq.com	Wang, Jun/IQU-0449-2023		National Natural Science Foundation of China [51878185]; Innovative Research Team Program of Guangxi Natural Science Foundation [2016GXNSFGA380008]	National Natural Science Foundation of China(National Natural Science Foundation of China (NSFC)); Innovative Research Team Program of Guangxi Natural Science Foundation	The authors would like to express their sincere gratitude to National Natural Science Foundation of China (Grant No. 51878185) and Innovative Research Team Program of Guangxi Natural Science Foundation (Grant No. 2016GXNSFGA380008) for support.		67	0	0	8	25	SPRINGER HEIDELBERG	HEIDELBERG	TIERGARTENSTRASSE 17, D-69121 HEIDELBERG, GERMANY	2190-6815	2190-6823		BIOMASS CONVERS BIOR	Biomass Convers. Biorefinery	2022 MAY 6	2022
J	Antonio, J; Bastos, G; Almeida, J; Tadeu, A; Marques, B; Marques, A; Armesto, J; Patino-Barbeito, F				Antonio, Julieta; Bastos, Guillermo; Almeida, Joao; Tadeu, Antonio; Marques, Beatriz; Marques, Arlindo; Armesto, Julia; Patino-Barbeito, Faustino			Influence of Different Dosages of Limestone Dust and Charcoal on the Properties of Lightweight Cement Composites	JOURNAL OF MATERIALS IN CIVIL ENGINEERING			English	Article						Charcoal; Limestone dust; Portland cement-based composite; Physical and mechanical properties; Construction material	THERMAL-CONDUCTIVITY; BY-PRODUCTS; WOOD WASTE; CONCRETE; BIOCHAR; CONSTRUCTION; PERFORMANCE; MORTARS; QUARRY	This paper presents the characterization of new lightweight cement composites incorporating limestone dust and charcoal. The charcoal is used not only to make the composite lighter in weight but also to improve its hygrothermal performance. Additionally, limestone dust, a waste material, is used instead of sand in the mixtures to improve their sustainability. Results show that the limestone-charc…	[Antonio, Julieta; Tadeu, Antonio] Univ Coimbra, Dept Civil Engn, Polo 2, ADAI LAETA, Rua Luis Reis Santos, P-3030788 Coimbra, Portugal; [Antonio, Julieta; Almeida, Joao; Tadeu, Antonio; Marques, Beatriz] ITeCons Inst Res & Technol Dev Construct Energy E, Rua Pedro Hispano S-N, P-3030289 Coimbra, Portugal; [Bastos, Guillermo; Patino-Barbeito, Faustino] Univ Vigo, Ind Engn Sch, Rua Conde Torrecede…	Universidade de Coimbra; Universidade de Coimbra; Universidade de Vigo; Universidade de Vigo	Antonio, J (corresponding author), Univ Coimbra, Dept Civil Engn, Polo 2, ADAI LAETA, Rua Luis Reis Santos, P-3030788 Coimbra, Portugal.;Antonio, J (corresponding author), ITeCons Inst Res & Technol Dev Construct Energy E, Rua Pedro Hispano S-N, P-3030289 Coimbra, Portugal.	julieta@dec.uc.pt; inardesign.gbastos@uvigo.es; joao.almeida@itecons.uc.pt; tadeu@itecons.uc.pt; beatriz.marques@itecons.uc.pt; Arlindo.Marques@solancis.com; julia@uvigo.es; fpatino@uvigo.es	Bastos, Guillermo/AAI-1070-2019; Tadeu, Antonio/G-6358-2019; Antonio, Julieta/Y-6926-2018; Armesto, Julia/T-6600-2019	Bastos, Guillermo/0000-0003-1984-4687; Tadeu, Antonio/0000-0003-2535-8458; Almeida, Joao/0000-0002-7084-882X; Antonio, Julieta/0000-0002-5996-2023; Armesto, Julia/0000-0002-8173-8319	Operational Program for Competitiveness and Internationalization (POCI) of Portugal 2020 [POCI-010247-FEDER-017889]; European Regional Development Fund (FEDER); University of Vigo	Operational Program for Competitiveness and Internationalization (POCI) of Portugal 2020; European Regional Development Fund (FEDER)(European Union (EU)); University of Vigo	The authors are grateful to the Project INOVWALL (POCI-010247-FEDER-017889) funded by the Operational Program for Competitiveness and Internationalization (POCI) of Portugal 2020, with the support of the European Regional Development Fund (FEDER). The support provided by the University of Vigo to Guillermo Bastos Costas through a grant that covered a research placement at Itecons is also grateful…		79	1	1	2	9	ASCE-AMER SOC CIVIL ENGINEERS	RESTON	1801 ALEXANDER BELL DR, RESTON, VA 20191-4400 USA	0899-1561	1943-5533		J MATER CIVIL ENG	J. Mater. Civ. Eng.	OCT 1	2021	33	10
J	Beskopylny, AN; Stel'makh, SA; Shcherban', EM; Mailyan, LR; Meskhi, B; Smolyanichenko, AS; Beskopylny, N				Beskopylny, Alexey N.; Stel'makh, Sergey A.; Shcherban', Evgenii M.; Mailyan, Levon R.; Meskhi, Besarion; Smolyanichenko, Alla S.; Beskopylny, Nikita			High-Performance Concrete Nanomodified with Recycled Rice Straw Biochar	APPLIED SCIENCES-BASEL			English	Article						concrete; rice straw; biochar; nanomodification; strength characteristics; deformation characteristics	HUSK ASH; FLY-ASH; DURABILITY	The development of new and improvement of existing technologies based on the use of waste products from various industries or recyclable materials is a current trend in the construction industry. Including in the composition of binders and concrete by-products of industry, reducing the proportion of Portland cement, it is crucial to maintain and improve the resulting products' mechanical characte…	[Beskopylny, Alexey N.] Don State Tech Univ, Fac Rd & Transport Syst, Dept Transport Syst, Rostov Na Donu 344003, Russia; [Stel'makh, Sergey A.; Shcherban', Evgenii M.] Don State Tech Univ, Dept Engn Geol Bases & Fdn, Rostov Na Donu 344003, Russia; [Mailyan, Levon R.] Don State Tech Univ, Dept Rd, Rostov Na Donu 344003, Russia; [Meskhi, Besarion] Don State Tech Univ, Fac Life Safety & Environm En…	Don State Technical University; Don State Technical University; Don State Technical University; Don State Technical University; Don State Technical University; Don State Technical University	Beskopylny, AN (corresponding author), Don State Tech Univ, Fac Rd & Transport Syst, Dept Transport Syst, Rostov Na Donu 344003, Russia.	besk-an@yandex.ru; sergej.stelmax@mail.ru; au-geen@mail.ru; lrm@aaanet.ru; spu-02@donstu.ru; arpis-2006@mail.ru; beskna@yandex.ru	Stel'makh, Sergei/AAG-6076-2020; Beskopylnyy, Alexey/P-1373-2015; Alla, Smolyanichenko/ADW-6799-2022; Shcherban', Evgenii/AAG-6070-2020; Meskhi, Besarion/GYJ-5572-2022; Beskopilniy, Nikita/GOV-2973-2022; Mailyan, Levon/AAO-9095-2020	Stel'makh, Sergei/0000-0002-0364-5504; Beskopylnyy, Alexey/0000-0002-6173-9365; Shcherban', Evgenii/0000-0001-5376-247X; Meskhi, Besarion/0000-0003-3497-3102; Beskopilniy, Nikita/0000-0002-4727-205X; Mailyan, Levon/0000-0003-0162-2699	Don State Technical University	Don State Technical University	The authors would like to acknowledge the administration of Don State Technical University for their resources and financial support.		46	12	12	12	30	MDPI	BASEL	ST ALBAN-ANLAGE 66, CH-4052 BASEL, SWITZERLAND		2076-3417		APPL SCI-BASEL	Appl. Sci.-Basel	JUN	2022	12	11
J	Mishra, G; Danoglidis, P; Shah, SP; Konsta-Gdoutos, M				Mishra, Geetika; Danoglidis, Panagiotis; Shah, Surendra P.; Konsta-Gdoutos, Maria			Optimization of biochar and fly ash to improve mechanical properties and CO2 sequestration in cement mortar	CONSTRUCTION AND BUILDING MATERIALS			English	Article						Biochar; Fly ash; CO2 sequestration; Accelerated carbonation; Fracture properties	PORTLAND-CEMENT; WASTE; CARBONATION	The novelty of this study is to find out the optimum amount of biochar and high calcium fly ash to improve mechanical performance and promote CO2 uptake in cement mortar. The potential of biochar-fly ash mixes was optimized using response surface methodology (RSM) considering the influence of different amounts of fly ash (FA), biochar (B), and their interactions to achieve the optimal mix design …	[Mishra, Geetika; Danoglidis, Panagiotis; Shah, Surendra P.; Konsta-Gdoutos, Maria] Univ Texas Arlington, Ctr Adv Construct Mat, Dept Civil Engn, 701 S Nedderman Dr, Arlington, TX 76019 USA	University of Texas System; University of Texas Arlington	Mishra, G (corresponding author), Univ Texas Arlington, Ctr Adv Construct Mat, Dept Civil Engn, 701 S Nedderman Dr, Arlington, TX 76019 USA.	gm694@drexel.edu			National Science Foundation-Partnerships for International Research and Education (PIRE) Research Funding Program Advancing International Partnerships in Research for Decoupling Concrete Manufacturing and Global Greenhouse Gas Emissions [NSF-PIRE-2230747]	National Science Foundation-Partnerships for International Research and Education (PIRE) Research Funding Program Advancing International Partnerships in Research for Decoupling Concrete Manufacturing and Global Greenhouse Gas Emissions	The authors would like to acknowledge the financial support of the National Science Foundation-Partnerships for International Research and Education (PIRE) Research Funding Program Advancing International Partnerships in Research for Decoupling Concrete Manufacturing and Global Greenhouse Gas Emissions (NSF-PIRE-2230747). Proton Power, Inc. is kindly acknowledged for supplying biochar. The help p…		40	0	0	3	3	ELSEVIER SCI LTD	OXFORD	THE BOULEVARD, LANGFORD LANE, KIDLINGTON, OXFORD OX5 1GB, OXON, ENGLAND	0950-0618	1879-0526		CONSTR BUILD MATER	Constr. Build. Mater.	AUG 15	2023	392
J	Pennanen, T; Srivastava, V; Sillanpaa, M; Sainio, T				Pennanen, Toni; Srivastava, Varsha; Sillanpaa, Mika; Sainio, Tuomo			Compost: Potent biosorbent for the removal of heavy metals from industrial and landfill stormwater	JOURNAL OF CLEANER PRODUCTION			English	Article						Stormwater; Adsorption; Compost; Heavy metal	AQUEOUS-SOLUTION; ADSORPTION; BIOSORPTION; POLLUTANTS; EFFICIENCY; KINETICS; BIOCHAR; ADSORBENT; ISOTHERM; PAPER	Stormwater can be contaminated with heavy metals and low-cost solutions are needed to treat large amounts of water. This study was conducted to determine the viability of compost as an adsorbent in Nordic conditions to treat stormwaters. Metal ions chosen for this study were Cadmium(II), Copper(II), Nickel(II), Lead(II) and Zinc(II) and the observed order of adsorption affinities to compost is Le…	[Pennanen, Toni; Srivastava, Varsha; Sainio, Tuomo] Lappeenrantae Lahti Univ Technol LUT, Dept Separat Sci, Sammonkatu 12, FI-50130 Mikkeli, Finland; [Sillanpaa, Mika] Duy Tan Univ, Inst Res & Dev, Da Nang 550000, Vietnam; [Sillanpaa, Mika] Duy Tan Univ, Fac Environm & Chem Engn, Da Nang 550000, Vietnam; [Sillanpaa, Mika] Univ Southern Queensland, Fac Hlth Engn & Sci, Sch Civil Engn & Surveying, …	Duy Tan University; Duy Tan University; University of Southern Queensland; University of Johannesburg	Pennanen, T (corresponding author), Lappeenrantae Lahti Univ Technol LUT, Dept Separat Sci, Sammonkatu 12, FI-50130 Mikkeli, Finland.	Toni.Pennanen@lut.fi	Sillanpää, Mika E T/G-1366-2011; Srivastava, Varsha/AAN-9776-2020	Sillanpää, Mika E T/0000-0003-3247-5337; Srivastava, Varsha/0000-0003-2275-9168; Pennanen, Toni/0000-0001-5709-2645	European Regional Development Fund, ERDF [A73961]	European Regional Development Fund, ERDF(European Union (EU))	The XPS analysis was carried out at the University of Oulu, Oulu, Finland. The SEM-EDS analysis was done at South-Eastern Finland University of Applied Sciences, XAMK, Mikkeli, Finland. This research was supported by the European Regional Development Fund, ERDF, grant ID A73961. Special thanks go for G. Lucas for creating something that has kept me inspired even during the dark times caused by ET.		47	15	15	2	23	ELSEVIER SCI LTD	OXFORD	THE BOULEVARD, LANGFORD LANE, KIDLINGTON, OXFORD OX5 1GB, OXON, ENGLAND	0959-6526	1879-1786		J CLEAN PROD	J. Clean Prod.	NOV 10	2020	273
J	Boehm, AB; Bell, CD; Fitzgerald, NJM; Gallo, E; Higgins, CP; Hogue, TS; Luthy, RG; Portmann, AC; Ulrich, BA; Wolfand, JM				Boehm, Alexandria B.; Bell, Colin D.; Fitzgerald, Nicole J. M.; Gallo, Elizabeth; Higgins, Christopher P.; Hogue, Terri S.; Luthy, Richard G.; Portmann, Andrea C.; Ulrich, Bridget A.; Wolfand, Jordyn M.			Biochar-augmented biofilters to improve pollutant removal from stormwater - can they improve receiving water quality?	ENVIRONMENTAL SCIENCE-WATER RESEARCH & TECHNOLOGY			English	Review							IMPROVED CONTAMINANT REMOVAL; TRACE ORGANIC CONTAMINANTS; ESCHERICHIA-COLI REMOVAL; ACTIVATED CARBON; PARTICLE-SIZE; GREEN INFRASTRUCTURE; BIORETENTION SYSTEM; INDICATOR BACTERIA; NUTRIENT REMOVAL; FIELD-EVALUATION	Stormwater biofilters are being implemented widely in urban environments to provide green space, alleviate flooding, and improve stormwater quality. However, biofilters with conventional media (sand, soil, and/or mulch or compost) do not reliably remove contaminants from stormwater. Research suggests addition of biochar to the biofilter media can improve the pollutant removal capacity of biofilte…	[Boehm, Alexandria B.; Luthy, Richard G.] Stanford Univ, Dept Civil & Environm Engn, Stanford, CA 94305 USA; [Boehm, Alexandria B.; Bell, Colin D.; Fitzgerald, Nicole J. M.; Gallo, Elizabeth; Higgins, Christopher P.; Hogue, Terri S.; Luthy, Richard G.; Portmann, Andrea C.; Wolfand, Jordyn M.] Engn Res Ctr ERC Reinventing Nations Urban Water, Stanford, CA USA; [Bell, Colin D.; Fitzgerald, Nicole J…	Stanford University; Colorado School of Mines; University of Minnesota System; University of Minnesota Duluth; University of Portland	Boehm, AB (corresponding author), Stanford Univ, Dept Civil & Environm Engn, Stanford, CA 94305 USA.;Boehm, AB (corresponding author), Engn Res Ctr ERC Reinventing Nations Urban Water, Stanford, CA USA.	aboehm@stanford.edu	Higgins, Christopher P/B-1836-2010; Wolfand, J./T-5194-2019	Higgins, Christopher P/0000-0001-6220-8673; Wolfand, J./0000-0003-2650-4373; Luthy, Richard/0000-0003-0274-0240; Portmann, Andrea/0000-0002-4524-6034; Gallo, Elizabeth/0000-0002-8042-4860; Boehm, Alexandria/0000-0002-8162-5090; Bell, Colin/0000-0001-8712-9859; Hogue, Terri/0000-0003-1524-8896	NSF [EEC-1028968]; U.S. EPA [R836174]; EPA [R836174, 909796] Funding Source: Federal RePORTER	NSF(National Science Foundation (NSF)); U.S. EPA(United States Environmental Protection Agency); EPA(United States Environmental Protection Agency)	This work received funding from NSF through grant number EEC-1028968, NSF = US National Science Foundation (www.nsf.gov).The sponsor played no role in the study design, data collection and analysis, decision to publish or prep of the manuscript. This work was also partially supported under Assistance Agreement No. R836174 awarded by the U.S. EPA to the Colorado School of Mines, the Nature Conserv…		137	38	42	11	85	ROYAL SOC CHEMISTRY	CAMBRIDGE	THOMAS GRAHAM HOUSE, SCIENCE PARK, MILTON RD, CAMBRIDGE CB4 0WF, CAMBS, ENGLAND	2053-1400	2053-1419		ENVIRON SCI-WAT RES	Environ. Sci.-Wat. Res. Technol.	JUN 1	2020	6	6
J	Tian, J; Miller, V; Chiu, PC; Maresca, JA; Guo, MX; Imhoff, PT				Tian, Jing; Miller, Valentina; Chiu, Pei C.; Maresca, Julia A.; Guo, Mingxin; Imhoff, Paul T.			Nutrient release and ammonium sorption by poultry litter and wood biochars in stormwater treatment	SCIENCE OF THE TOTAL ENVIRONMENT			English	Article						Biochar; Pyrolysis temperature; Nutrient leaching; Ammonium sorption; Ion competition; Stormwater treatment	BLACK CARBON; PHYSICAL-PROPERTIES; ORGANIC-COMPOUNDS; SOIL; NITROGEN; ADSORPTION; PHOSPHATE; WATER; MANAGEMENT; NITRATE	The feasibility of using biochar as a filter medium in stormwater treatment facilities was evaluated with a focus on ammonium retention. Successive batch extractions and batch ammonium sorption experiments were conducted in both deionized (DI) water and artificial stormwater using poultry litter (PL) and hardwood (HW) biochars pyrolyzed at 400 degrees C and 500 degrees C. No measureable nitrogen …	[Tian, Jing] Southwest Jiaotong Univ, Sch Geosci & Environm Engn, Chengdu 610031, Sichuan, Peoples R China; [Tian, Jing; Miller, Valentina; Chiu, Pei C.; Maresca, Julia A.; Imhoff, Paul T.] Univ Delaware, Dept Civil & Environm Engn, Newark, DE 19716 USA; [Guo, Mingxin] Delaware State Univ, Dept Agr & Nat Resources, Dover, DE 19901 USA	Southwest Jiaotong University; University of Delaware; Delaware State University	Imhoff, PT (corresponding author), Univ Delaware, Dept Civil & Environm Engn, Newark, DE 19716 USA.	wenling.tien@gmail.com; mguo@desu.edu; imhoff@udel.edu	Tian, Jing/GPX-8761-2022	Maresca, Julia/0000-0002-3955-1585	Delaware Department of Transportation (DelDOT); National Fish and Wildlife Foundation; China Scholarship Council (CSC)	Delaware Department of Transportation (DelDOT); National Fish and Wildlife Foundation; China Scholarship Council (CSC)(China Scholarship Council)	The research is funded by Delaware Department of Transportation (DelDOT) and the National Fish and Wildlife Foundation. The China Scholarship Council (CSC) provided financial support for the first author's visit to the University of Delaware.		69	79	86	2	180	ELSEVIER	AMSTERDAM	RADARWEG 29, 1043 NX AMSTERDAM, NETHERLANDS	0048-9697	1879-1026		SCI TOTAL ENVIRON	Sci. Total Environ.	MAY 15	2016	553
J	Zhao, M; Jia, YH; Yuan, LJ; Qiu, J; Xie, C				Zhao, Min; Jia, Yinghui; Yuan, Linjuan; Qiu, Jing; Xie, Chao			Experimental study on the vegetation characteristics of biochar-modified vegetation concrete	CONSTRUCTION AND BUILDING MATERIALS			English	Article						Vegetation concrete; Biochar; Permeability; Plant compatibility	POROUS CONCRETE; PLANT-GROWTH; HEAVY-METALS; ROAD RUNOFF; SOIL; CEMENT; PERFORMANCE; REMOVAL; CARBON; WATER	Vegetation concrete is an effective material to beautify the landscape, reduce pollution and protect the environment. To further improve the plant compatibility of vegetation concrete, this paper recommends an improved method of adding biochar particles to vegetation concrete. In this research, different masses of biochar were mixed into concrete to study the trend in porosity, permeability and p…	[Zhao, Min; Jia, Yinghui; Yuan, Linjuan; Qiu, Jing; Xie, Chao] China Agr Univ, Coll Water Resources & Civil Engn, Beijing 100083, Peoples R China	China Agricultural University	Yuan, LJ (corresponding author), China Agr Univ, Coll Water Resources & Civil Engn, Beijing 100083, Peoples R China.	linjuanyuan@cau.edu.cn			National Key R&D Program of China [2017YFC0403600, 2017YFC0403602]; National Student's Platform for Innovation and Entrepreneurship training program [201710019199]	National Key R&D Program of China; National Student's Platform for Innovation and Entrepreneurship training program	The authors would like to acknowledge the financial support from the National Key R&D Program of China (2017YFC0403600, 2017YFC0403602), and National Student's Platform for Innovation and Entrepreneurship training program (201710019199).		52	17	18	23	116	ELSEVIER SCI LTD	OXFORD	THE BOULEVARD, LANGFORD LANE, KIDLINGTON, OXFORD OX5 1GB, OXON, ENGLAND	0950-0618	1879-0526		CONSTR BUILD MATER	Constr. Build. Mater.	MAY 10	2019	206
J	Vergara, LA; Perez, JF; Colorado, HA				Vergara, Luis A.; Perez, Juan F.; Colorado, Henry A.			3D printing of ordinary Portland cement with waste wood derived biochar obtained from gasification	CASE STUDIES IN CONSTRUCTION MATERIALS			English	Article						Additive manufacturing; 3D printing; Ordinary portland cement; Gasification biochar; Solid waste; Building; Construction	FLY-ASH; CHEMICAL-CHARACTERIZATION; COMBUSTION PROPERTIES; PROCESS PARAMETERS; NATURAL-DRAFT; BIOMASS; CONCRETE; PERFORMANCE; MODEL; AIR	This research aims to use a circular economy approach for the incorporation of biochar powder from wood biomass gasification (at 0, 5, 10, 15 and 20 wt%) in combination with ordinary portland cement and additive manufacturing (3D printing), specifically using direct ink writing technique. This technique can be used both at large scale and low cost. The importance of this investigation lies in the…	[Vergara, Luis A.; Colorado, Henry A.] Univ Antioquia UdeA, Composites Lab, Calle 70 52-21, Medellin, Colombia; [Perez, Juan F.] Univ Antioquia, Fac Ingn, Dept Ingn Mecan, Grp Manejo Eficiente Energia GIMEL, Calle 67 53-108, Medellin, Colombia; [Colorado, Henry A.] Univ Antioquia, Fac Ingn, Bloque 20,Calle 67 53-108, Medellin, Colombia	Universidad de Antioquia; Universidad de Antioquia; Universidad de Antioquia	Colorado, HA (corresponding author), Univ Antioquia, Fac Ingn, Bloque 20,Calle 67 53-108, Medellin, Colombia.	henry.colorado@udea.edu.co			Universidad de Antioquia [PRG2019-31090 (ES25190102)]	Universidad de Antioquia	The authors acknowledge the financial support of Universidad de Antioquia through the research project Energy recovery of the fallen leaves biomass from the University of Antioquia's central campus, code: PRG2019-31090 (ES25190102) .		77	1	1	6	6	ELSEVIER	AMSTERDAM	RADARWEG 29, 1043 NX AMSTERDAM, NETHERLANDS	2214-5095			CASE STUD CONSTR MAT	Case Stud. Constr. Mater.	JUL	2023	18
J	Ding, XM; Wang, JF; Huang, Q; Hu, S; Wu, YJ; Wang, LY				Ding, Xiuming; Wang, Junfeng; Huang, Qing; Hu, Shan; Wu, Yuejun; Wang, Luya			The Effects of Waste Cement on the Bioavailability, Mobility, and Leaching of Cadmium in Soil	INTERNATIONAL JOURNAL OF ENVIRONMENTAL RESEARCH AND PUBLIC HEALTH			English	Article						waste cement; cadmium; adsorption; immobilization; bioavailability; leaching	LEAD-CONTAMINATED SOIL; DEMOLITION WASTE; PORTLAND-CEMENT; ACID-RAIN; PB; BIOCHAR; CD; IMMOBILIZATION; AVAILABILITY; ADSORPTION	Waste cement is a construction and demolition waste produced from old buildings' demolition and transformation. In recent years, the recycling of recycled concrete is limited to the use of recycled aggregate, and the research on the utilization of waste cement in waste concrete is scarce. This study explored the effective application of waste cement for the adsorption of cadmium (Cd2+) from an aq…	[Ding, Xiuming; Wang, Junfeng; Huang, Qing; Hu, Shan; Wu, Yuejun; Wang, Luya] Hainan Univ, Coll Ecol & Environm, Haikou 570228, Hainan, Peoples R China; [Ding, Xiuming; Wang, Junfeng; Huang, Qing; Hu, Shan; Wu, Yuejun; Wang, Luya] Hainan Univ, State Key Lab Marine Resource Utilizat South Chin, Haikou 570228, Hainan, Peoples R China; [Ding, Xiuming; Wang, Junfeng; Wu, Yuejun] Shenzhen Univ, Coll C…	Hainan University; Hainan University; Shenzhen University	Wang, JF; Huang, Q (corresponding author), Hainan Univ, Coll Ecol & Environm, Haikou 570228, Hainan, Peoples R China.;Wang, JF; Huang, Q (corresponding author), Hainan Univ, State Key Lab Marine Resource Utilizat South Chin, Haikou 570228, Hainan, Peoples R China.;Wang, JF (corresponding author), Shenzhen Univ, Coll Civil & Transportat Engn, Shenzhen 518061, Peoples R China.	dingxiuming42@gmail.com; jfwang@szu.edu.cn; huangqing@hainanu.edu.cn; hushan2000@126.com; wuyuejun1992@gmail.com; wangluya4025@gmail.com			National Natural Science Foundation of China [41603107, 41867047]	National Natural Science Foundation of China(National Natural Science Foundation of China (NSFC))	This work was financially supported by the National Natural Science Foundation of China (41603107 and 41867047).		59	3	3	7	30	MDPI	BASEL	ST ALBAN-ANLAGE 66, CH-4052 BASEL, SWITZERLAND		1660-4601		INT J ENV RES PUB HE	Int. J. Environ. Res. Public Health	AUG	2021	18	16
J	Wolfand, JM; Seller, C; Bell, CD; Cho, YM; Oetjen, K; Hogue, TS; Luthy, RG				Wolfand, Jordyn M.; Seller, Carolin; Bell, Colin D.; Cho, Yeo-Myoung; Oetjen, Karl; Hogue, Terri S.; Luthy, Richard G.			Occurrence of Urban-Use Pesticides and Management with Enhanced Stormwater Control Measures at the Watershed Scale	ENVIRONMENTAL SCIENCE & TECHNOLOGY			English	Article							PYRETHROID INSECTICIDES; SEDIMENT TOXICITY; ESCHERICHIA-COLI; NITRATE REMOVAL; SURFACE WATERS; FIPRONIL; CALIFORNIA; BIOCHAR; TRANSPORT; STREAMS	Urban-use pesticides are of increasing concern as they are widely used and have been linked to toxicity of aquatic organisms. To assess the occurrence and treatment of these pesticides in stormwater runoff, an approach combining field sampling and watershed-scale modeling was employed. Stormwater samples were collected at four locations in the lower San Diego River watershed during a storm event …	[Wolfand, Jordyn M.; Seller, Carolin; Bell, Colin D.; Cho, Yeo-Myoung; Hogue, Terri S.; Luthy, Richard G.] Stanford Univ, NSF Engn Res Ctr Reinventing Nations Urban Water, Stanford, CA 94305 USA; [Wolfand, Jordyn M.; Seller, Carolin; Cho, Yeo-Myoung; Luthy, Richard G.] Stanford Univ, Dept Civil & Environm Engn, Stanford, CA 94305 USA; [Seller, Carolin] Swiss Fed Inst Aquat Sci & Technol, Eawag, D…	Stanford University; Stanford University; Swiss Federal Institutes of Technology Domain; Swiss Federal Institute of Aquatic Science & Technology (EAWAG); Colorado School of Mines; SCIEX	Luthy, RG (corresponding author), Stanford Univ, NSF Engn Res Ctr Reinventing Nations Urban Water, Stanford, CA 94305 USA.;Luthy, RG (corresponding author), Stanford Univ, Dept Civil & Environm Engn, Stanford, CA 94305 USA.	luthy@stanford.edu	Wolfand, J./T-5194-2019	Wolfand, J./0000-0003-2650-4373; Luthy, Richard/0000-0003-0274-0240; Bell, Colin/0000-0001-8712-9859	National Science Foundation's Engineering Research Center for Reinventing the Nation's Urban Water Infrastructure (ReNUWIt) [NSF ERC 1028968]; UPS Foundation	National Science Foundation's Engineering Research Center for Reinventing the Nation's Urban Water Infrastructure (ReNUWIt); UPS Foundation	We thank Ken Schiff and the team at the Southern California Coastal Water Research Project (SCCWRP) for organizing the field sampling, providing precipitation and flow data, and providing comments on the manuscript. In addition, we thank Patricia Gonzales and Kim Quesnel who assisted with the field work in San Diego. We are grateful to Chris Higgins for the use of his GC-MS/MS. Lastly, we thank A…		71	23	23	9	95	AMER CHEMICAL SOC	WASHINGTON	1155 16TH ST, NW, WASHINGTON, DC 20036 USA	0013-936X	1520-5851		ENVIRON SCI TECHNOL	Environ. Sci. Technol.	APR 2	2019	53	7
J	Zhang, YY; He, MJ; Wang, L; Yan, JH; Ma, B; Zhu, XH; Ok, YS; Mechtcherine, V; Tsang, DCW				Zhang, Yuying; He, Mingjing; Wang, Lei; Yan, Jianhua; Ma, Bin; Zhu, Xiaohong; Ok, Yong Sik; Mechtcherine, Viktor; Tsang, Daniel C. W.			Biochar as construction materials for achieving carbon neutrality	BIOCHAR			English	Review						Engineered biochar; Biomass waste management; Carbon-negative materials; Carbon neutrality; Supplementary cementitious materials; Sustainable construction	PHASE-CHANGE MATERIALS; NATURAL-RUBBER; MECHANICAL-PROPERTIES; HYBRID BIOCOMPOSITES; CEMENT; PERFORMANCE; COMPOSITES; WASTE; CONCRETE; ENERGY	Biochar is a waste-derived material that can sequester carbon at a large scale. The development of low-carbon and sustainable biochar-enhanced construction materials has attracted extensive interest. Biochar, having a porous nature and highly functionalised surface, can provide nucleation sites for chemical reactions and exhibit compatibility with cement, asphalt, and polymer materials. This stud…	[Zhang, Yuying; He, Mingjing; Tsang, Daniel C. W.] Hong Kong Polytech Univ, Dept Civil & Environm Engn, Hung Hom, Kowloon, Hong Kong, Peoples R China; [Wang, Lei; Yan, Jianhua; Tsang, Daniel C. W.] Zhejiang Univ, State Key Lab Clean Energy Utilizat, Hangzhou 310027, Peoples R China; [Ma, Bin] Paul Scherrer Inst, Lab Waste Management, Nucl Energy & Safety, CH-5232 Villigen, Switzerland; [Zhu, Xiao…	Hong Kong Polytechnic University; Zhejiang University; Swiss Federal Institutes of Technology Domain; Paul Scherrer Institute; University of Leeds; Korea University; Korea University; Technische Universitat Dresden; Hong Kong Polytechnic University	Tsang, DCW (corresponding author), Hong Kong Polytech Univ, Dept Civil & Environm Engn, Hung Hom, Kowloon, Hong Kong, Peoples R China.;Wang, L; Tsang, DCW (corresponding author), Zhejiang Univ, State Key Lab Clean Energy Utilizat, Hangzhou 310027, Peoples R China.;Tsang, DCW (corresponding author), Hong Kong Polytech Univ, Res Ctr Resources Engn Carbon Neutral, Hung Hom, Kowloon, Hong Kong, Peopl…	wanglei.leo@zju.edu.cn; dan.tsang@polyu.edu.hk	Tsang, Dan/E-5442-2012; WANG, Lei/C-8138-2018; tao, sun/AAA-4645-2020	Tsang, Dan/0000-0002-6850-733X; WANG, Lei/0000-0002-0336-7241; Mechtcherine, Viktor/0000-0002-4685-7064	Hong Kong Green Tech Fund [GTF202020153]; Hong Kong Environment and Conservation Fund [104/2021]	Hong Kong Green Tech Fund; Hong Kong Environment and Conservation Fund	This work was supported by the Hong Kong Green Tech Fund (GTF202020153) and Hong Kong Environment and Conservation Fund (Project 104/2021).		201	17	17	200	386	SPRINGER SINGAPORE PTE LTD	SINGAPORE	#04-01 CENCON I, 1 TANNERY RD, SINGAPORE 347719, SINGAPORE	2524-7972	2524-7867		BIOCHAR	Biochar	DEC	2022	4	1
J	Lau, AYT; Tsang, DCW; Graham, NJD; Ok, YS; Yang, X; Li, XD				Lau, Abbe Y. T.; Tsang, Daniel C. W.; Graham, Nigel J. D.; Ok, Yong Sik; Yang, Xin; Li, Xiang-dong			Surface-modified biochar in a bioretention system for Escherichia coli removal from stormwater	CHEMOSPHERE			English	Article						Bacteria removal; Bioretention systems; Designer biochar; Intermittent flow; Stormwater harvesting	ACTIVATED CARBON SURFACE; FECAL INDICATOR BACTERIA; PYROLYSIS TEMPERATURE; AMINO MODIFICATION; ADSORPTION; TRANSPORT; WASTE; WATER; SOIL; MOBILIZATION	Bioretention systems have been recommended as one of the best management practices for low impact development for water recycling/reuse systems. Although improvement of the stormwater quality has been reported regarding pollutants eliminations such as suspended solids and heavy metals, a substantial removal of indicator bacteria is required for possible non-potable reuse. This study investigated …	[Lau, Abbe Y. T.; Tsang, Daniel C. W.; Li, Xiang-dong] Hong Kong Polytech Univ, Dept Civil & Environm Engn, Kowloon, Hong Kong, Peoples R China; [Graham, Nigel J. D.] Imperial Coll London, Dept Civil & Environm Engn, South Kensington Campus, London SW7 2AZ, England; [Ok, Yong Sik] Kangwon Natl Univ, Korea Biochar Res Ctr, Chunchon 24341, South Korea; [Ok, Yong Sik] Kangwon Natl Univ, Sch Nat Reso…	Hong Kong Polytechnic University; Imperial College London; Kangwon National University; Kangwon National University; Sun Yat Sen University	Tsang, DCW (corresponding author), Hong Kong Polytech Univ, Dept Civil & Environm Engn, Kowloon, Hong Kong, Peoples R China.	dan.tsang@polyu.edu.hk	li, xiang/GWM-6319-2022; Tsang, Dan/E-5442-2012; Ok, Yong Sik/R-6739-2016; Yang, Xin/AAD-7760-2021; Li, Xiangdong/B-2211-2008	Tsang, Dan/0000-0002-6850-733X; Ok, Yong Sik/0000-0003-3401-0912; Yang, Xin/0000-0001-9860-423X; Li, Xiangdong/0000-0002-4044-2888	Hong Kong Research Grants Council [PolyU 538613, 15222115]	Hong Kong Research Grants Council(Hong Kong Research Grants Council)	The authors appreciate the financial support from the Hong Kong Research Grants Council (PolyU 538613 and 15222115) for this study. The corresponding author particularly thanks the NSF Research Center ReNUWIt, Prof. Richard G. Luthy, and Dr. Sanjay K. Mohanty at Stanford University for their knowledge and experience sharing during his attachment as a visiting scholar in 2011-2013.		57	84	94	13	239	PERGAMON-ELSEVIER SCIENCE LTD	OXFORD	THE BOULEVARD, LANGFORD LANE, KIDLINGTON, OXFORD OX5 1GB, ENGLAND	0045-6535	1879-1298		CHEMOSPHERE	Chemosphere	FEB	2017	169
J	Cosentino, I; Restuccia, L; Ferro, GA; Tulliani, JM				Cosentino, Isabella; Restuccia, Luciana; Ferro, Giuseppe Andrea; Tulliani, Jean-Marc			Type of materials, pyrolysis conditions, carbon content and size dimensions: The parameters that influence the mechanical properties of biochar cement-based composites	THEORETICAL AND APPLIED FRACTURE MECHANICS			English	Article						Pyrolysis; Biochar; Cement-based composites; Carbon nanoparticles; Mechanical properties; Fracture energy		Interest in biochar, a sub-product of biomass pyrolysis, has increased enormously in the last few years, finding applications in a wide variety of fields. In the present work, a standardized biochar was used as a nano/microfiller in cement-based composites, ensuring the reproducibility of cement mixtures. Although, in terms of flexural strength and fracture energy, results were inferior compared …	[Cosentino, Isabella; Restuccia, Luciana; Ferro, Giuseppe Andrea] Politecn Torino, Dept Struct Geotech & Bldg Engn, I-10129 Turin, Italy; [Tulliani, Jean-Marc] Politecn Torino, Dept Appl Sci & Technol, I-10129 Turin, Italy	Polytechnic University of Turin; Polytechnic University of Turin	Ferro, GA (corresponding author), Politecn Torino, Dept Struct Geotech & Bldg Engn, I-10129 Turin, Italy.	ferro@polito.it	RESTUCCIA, LUCIANA/AAG-6761-2019; FERRO, GIUSEPPE ANDREA/F-8300-2018	RESTUCCIA, LUCIANA/0000-0002-6999-0466; FERRO, GIUSEPPE ANDREA/0000-0002-0622-4203					24	25	25	4	33	ELSEVIER	AMSTERDAM	RADARWEG 29, 1043 NX AMSTERDAM, NETHERLANDS	0167-8442	1872-7638		THEOR APPL FRACT MEC	Theor. Appl. Fract. Mech.	OCT	2019	103
J	Maljaee, H; Paiva, H; Madadi, R; Tarelho, LAC; Morais, M; Ferreira, VM				Maljaee, Hamid; Paiva, Helena; Madadi, Rozita; Tarelho, Luis A. C.; Morais, Miguel; Ferreira, Victor M.			Effect of cement partial substitution by waste-based biochar in mortars properties	CONSTRUCTION AND BUILDING MATERIALS			English	Article						Biochar; Carbon sequestration; Cement mortar; Olive stone; Rice husk; Wood chips	CARBONATION; CONCRETE; STRENGTH	Incorporation of biochar in cementitious materials is a promising solution in the mitigation of environmental pollutants by partially cutting off the consumed ordinary Portland cement and reducing the amount of waste disposal in landfills. This work studied the partial replacement of cement by biochars having a different chemical composition and its effect on the performance of cement mortars. Th…	[Maljaee, Hamid; Paiva, Helena] Univ Aveiro, Dept Civil Engn, CICECO, P-3810193 Aveiro, Portugal; [Madadi, Rozita] Univ Tehran, Univ Coll Agr & Nat Resources, Dept Agr Biotechnol, Karaj, Iran; [Tarelho, Luis A. C.] Univ Aveiro, Dept Environm & Planning, CESAM, P-3810193 Aveiro, Portugal; [Maljaee, Hamid; Morais, Miguel; Ferreira, Victor M.] Univ Aveiro, Dept Civil Engn, RISCO, P-3810193 Aveiro, P…	Universidade de Aveiro; University of Tehran; Universidade de Aveiro; Universidade de Aveiro	Maljaee, H (corresponding author), Univ Aveiro, Dept Civil Engn, RISCO, P-3810193 Aveiro, Portugal.	h.maljaee@ua.pt; hpaiva@ua.pt; ltarelho@ua.pt; miguelmorais@ua.pt; victorf@ua.pt	Tarelho, Luís AC/A-8278-2013; Maljaee, Hamid/X-9032-2019; Ferreira, Victor/H-3759-2013	Tarelho, Luís AC/0000-0003-0385-5621; Maljaee, Hamid/0000-0003-1429-8621; Ferreira, Victor/0000-0002-6295-1333	H2020 EU Research and Innovation programme [730305]; Portuguese Foundation for Science and Technology (FCT)/Ministry of Science, Technology and Higher Education (MCTES) [UIDP/50017/2020, UIDB/50017/2020, FCT/UIDB/ECI/04450/2020]; H2020 Societal Challenges Programme [730305] Funding Source: H2020 Societal Challenges Programme	H2020 EU Research and Innovation programme; Portuguese Foundation for Science and Technology (FCT)/Ministry of Science, Technology and Higher Education (MCTES)(Fundacao para a Ciencia e a Tecnologia (FCT)); H2020 Societal Challenges Programme(Horizon 2020)	The authors would like to acknowledge the support of the H2020 EU Research and Innovation programme for the funding of the Paperchain project under grant agreement n degrees 730305. Thanks are due to the Portuguese Foundation for Science and Tech-nology (FCT) /Ministry of Science, Technology and Higher Education (MCTES) for the financial support to CESAM (UIDP/50017/2020+U IDB/50017/2020) and RIS…		45	18	18	5	34	ELSEVIER SCI LTD	OXFORD	THE BOULEVARD, LANGFORD LANE, KIDLINGTON, OXFORD OX5 1GB, OXON, ENGLAND	0950-0618	1879-0526		CONSTR BUILD MATER	Constr. Build. Mater.	SEP 27	2021	301
J	Xiong, JQ; Li, GH; Zhu, JG; Li, JQ; Yang, Y; An, SX; Liu, CK				Xiong, Jiaqing; Li, Guohao; Zhu, Junguo; Li, Jianqiang; Yang, Yuan; An, Shengxia; Liu, Chengkui			Removal characteristics of heavy metal ions in rainwater runoff by bioretention cell modified with biochar	ENVIRONMENTAL TECHNOLOGY			English	Article						Bioretention cell; biochar; heavy metal removal; rainwater runoff; LID	ACTIVATED CARBON; SEDIMENT REMOVAL; STORMWATER; ADSORPTION; NITROGEN; COPPER; TEMPERATURE; PHOSPHORUS; CADMIUM; COMPOST	As a form of pollution source control and a low-impact development measure, bioretention is a convenient, economical, and effective method for the removal of heavy metals from stormwater runoff, which can adapt to the randomness and uncontrollability of non-point source pollution. However, few studies have assessed the performance of bioretention in the simultaneous removal of multiple heavy meta…	[Xiong, Jiaqing; Zhu, Junguo; Li, Jianqiang; Yang, Yuan] Xian Univ Architecture & Technol, Sch Environm & Municipal Engn, Yan Ta Road 13, Xian 710055, Peoples R China; [Xiong, Jiaqing; Li, Guohao; Zhu, Junguo; Li, Jianqiang; Yang, Yuan] Xian Univ Architecture & Technol, Key Lab Northwest Water Resource Environm & Ecol, MOE, Xian 710055, Peoples R China; [Xiong, Jiaqing; Li, Guohao] Xian Univ Arch…	Xi'an University of Architecture & Technology; Xi'an University of Architecture & Technology; Xi'an University of Architecture & Technology	Xiong, JQ (corresponding author), Xian Univ Architecture & Technol, Sch Environm & Municipal Engn, Yan Ta Road 13, Xian 710055, Peoples R China.;Xiong, JQ (corresponding author), Xian Univ Architecture & Technol, Key Lab Northwest Water Resource Environm & Ecol, MOE, Xian 710055, Peoples R China.;Xiong, JQ (corresponding author), Xian Univ Architecture & Technol, An Coll, Xian 710055, Peoples R C…	xiongjiaqing@xauat.edu.cn	li, jy/HTT-1535-2023; Liu, Jing/IQX-0664-2023; li, jian/GSE-0245-2022; LI, JIAN/GRY-2197-2022; LI, Jing/HNB-5575-2023; Li, Jing/GYU-5036-2022; li, jian/IAQ-2794-2023	li, jian/0009-0006-8677-8113; Guohao, Li/0000-0002-5976-3489	National Natural Science Foundation of China [52070152]; Key Research and Development Program of Shaanxi Province [2021NY-168]	National Natural Science Foundation of China(National Natural Science Foundation of China (NSFC)); Key Research and Development Program of Shaanxi Province	This work was supported by National Natural Science Foundation of China [grant number no. 52070152]; Key Research and Development Program of Shaanxi Province [grant number no. 2021NY-168].		46	9	9	21	99	TAYLOR & FRANCIS LTD	ABINGDON	2-4 PARK SQUARE, MILTON PARK, ABINGDON OR14 4RN, OXON, ENGLAND	0959-3330	1479-487X		ENVIRON TECHNOL	Environ. Technol.	DEC 19	2022	43	28
J	Esfandiar, N; Suri, R; McKenzie, ER				Esfandiar, Narges; Suri, Rominder; McKenzie, Erica R.			Simultaneous removal of multiple polycyclic aromatic hydrocarbons (PAHs) from urban stormwater using low-cost agricultural/industrial byproducts as sorbents	CHEMOSPHERE			English	Article						Stormwater treatment; Polycyclic aromatic hydrocarbons; Low-cost sorbents; Dissolved organic carbon; Hydrophobicity; Film diffusion	ACTIVATED CARBON; ORGANIC POLLUTANTS; ADSORPTION; SORPTION	The potential of five low-cost and globally available sorbents, including three raw waste products - waste tire crumb rubber (WTCR), coconut coir fiber (CCF) and blast furnace slag (BFS) - and two modified materials - biochar (BC) and iron coated biochar (FeBC) - were evaluated for removing a mixture of polycyclic aromatic hydrocarbons (PAHs): pyrene (PYR), phenanthrene (PHE), acenaphthylene (ACY…	[Esfandiar, Narges; Suri, Rominder; McKenzie, Erica R.] Temple Univ, Dept Civil & Environm Engn, Philadelphia, PA 19122 USA	Pennsylvania Commonwealth System of Higher Education (PCSHE); Temple University	McKenzie, ER (corresponding author), Temple Univ, Dept Civil & Environm Engn, Philadelphia, PA 19122 USA.	ermckenzie@temple.edu	McKenzie, Erica/F-1310-2010	McKenzie, Erica/0000-0003-1982-2533; Esfandiar, Narges/0000-0002-1528-7943	Pennsylvania Sea Grant (PASG) from the National Oceanic and Atmospheric Administration (NOAA) [5827-TU-NOAA-0074]; U.S. Department of Commerce; Civil and Environmental Engineering Department (CEE) at Temple University	Pennsylvania Sea Grant (PASG) from the National Oceanic and Atmospheric Administration (NOAA); U.S. Department of Commerce; Civil and Environmental Engineering Department (CEE) at Temple University	This work was partially supported by the Pennsylvania Sea Grant (PASG) [grant number 5827-TU-NOAA-0074, 2018] from the National Oceanic and Atmospheric Administration (NOAA), U.S. Department of Commerce and the Civil and Environmental Engineering Department (CEE) at Temple University. The opinions expressed in this article are those of the authors and do not necessarily reflect the views of PASG/…		51	29	30	15	88	PERGAMON-ELSEVIER SCIENCE LTD	OXFORD	THE BOULEVARD, LANGFORD LANE, KIDLINGTON, OXFORD OX5 1GB, ENGLAND	0045-6535	1879-1298		CHEMOSPHERE	Chemosphere	JUL	2021	274
J	Song, N; Li, ZH; Wang, SQ; Li, G				Song, Ning; Li, Zhihe; Wang, Shaoqing; Li, Guo			Biochar as internal curing material to prepare foamed concrete	CONSTRUCTION AND BUILDING MATERIALS			English	Article						Rice husk biochar; Yield stress; Foamed concrete	SUPERABSORBENT POLYMERS; YIELD-STRESS; CARBONATION; STABILITY; HYDRATION; STRENGTH; IMPACT	Biochar is one of the by-products of biomass pyrolysis, which has the characteristics of water absorption and low thermal conductivity, etc. This study produced foamed concrete incorporated rice husk biochar (RHBC) produced at 300 degrees C, 500 degrees C & 700 degrees C pyrolysis (B300, B500, B700) with replacement rates of 1%, 3%, 5% and 7 %. The experimental results show that B700 has the high…	[Song, Ning; Li, Zhihe; Wang, Shaoqing; Li, Guo] Shandong Univ Technol, Shandong Res Ctr Engn & Technol Clean Energy, Sch Agr Engn & Food Sci, Zibo 255000, Peoples R China	Shandong University of Technology	Li, ZH (corresponding author), Shandong Univ Technol, Shandong Res Ctr Engn & Technol Clean Energy, Sch Agr Engn & Food Sci, Zibo 255000, Peoples R China.	lizhihe@sdut.edu.cn			National Key Reserach and Devel- opment Program of China [2019YFD1100600]; National Natural Science Foundation of China [52176192]; Natural Natural Science Foundation of Shandong Province [ZR2021ME035]	National Key Reserach and Devel- opment Program of China; National Natural Science Foundation of China(National Natural Science Foundation of China (NSFC)); Natural Natural Science Foundation of Shandong Province(Natural Science Foundation of Shandong Province)	This work was supported by the National Key Reserach and Devel- opment Program of China (Grant No. 2019YFD1100600) , the National Natural Science Foundation of China (Grant No. 52176192) , and the Natural Natural Science Foundation of Shandong Province (Grant No. ZR2021ME035) .		74	0	0	11	11	ELSEVIER SCI LTD	OXFORD	THE BOULEVARD, LANGFORD LANE, KIDLINGTON, OXFORD OX5 1GB, OXON, ENGLAND	0950-0618	1879-0526		CONSTR BUILD MATER	Constr. Build. Mater.	MAY 9	2023	377
J	Sirico, A; Bernardi, P; Belletti, B; Malcevschi, A; Restuccia, L; Ferro, GA; Suarez-Riera, D				Sirico, Alice; Bernardi, Patrizia; Belletti, Beatrice; Malcevschi, Alessio; Restuccia, Luciana; Ferro, Giuseppe Andrea; Suarez-Riera, Daniel			Biochar-based cement pastes and mortars with enhanced mechanical properties	FRATTURA ED INTEGRITA STRUTTURALE			English	Article						Biochar; Nanoparticles; Cement-based composites; Strength; Toughness; Digital Image Correlation	CONCRETE; BIOMASS; FILLER; WASTE; SOIL; ASH	Nowadays, the environmental impact of cementitious material industry and more generally of building activities is matter of concern, especially in terms of their effects on climate change and consumption of natural resources. Within this context, the aim of this paper is the investigation of the role of biochar, a solid carbonaceous by-product material resulting from biomass pyrolysis/gasificatio…	[Sirico, Alice; Bernardi, Patrizia; Belletti, Beatrice; Malcevschi, Alessio] Univ Parma, Parma, Italy; [Restuccia, Luciana; Ferro, Giuseppe Andrea; Suarez-Riera, Daniel] Politecn Torino, Turin, Italy	University of Parma; Polytechnic University of Turin	Sirico, A (corresponding author), Univ Parma, Parma, Italy.	alice.sirico@unipr.it; patrizia.bernardi@unipr.it; beatrice.belletti@unipr.it; alessio.malcevschi@unipr.it; luciana.restuccia@polito.it; ferro@polito.it; daniel.suarez@polito.it	Sirico, Alice/ACF-5554-2022; RESTUCCIA, LUCIANA/AAG-6761-2019; FERRO, GIUSEPPE ANDREA/F-8300-2018	Sirico, Alice/0000-0001-5897-1641; RESTUCCIA, LUCIANA/0000-0002-6999-0466; FERRO, GIUSEPPE ANDREA/0000-0002-0622-4203					46	7	7	1	13	GRUPPO ITALIANO FRATTURA	CASSINO	VIA G DI BIASIO, CASSINO, 03043, ITALY	1971-8993			FRAT INTEGRITA STRUT	Frat. Integrita Strut.	OCT	2020		54
J	Akhtar, A; Sarmah, AK				Akhtar, Ali; Sarmah, Ajit K.			Novel biochar-concrete composites: Manufacturing, characterization and evaluation of the mechanical properties	SCIENCE OF THE TOTAL ENVIRONMENT			English	Article						Poultry litter; Rice husk; Biochar; Concrete; Compressive strength; Flexural strength	SUPPLEMENTARY CEMENTITIOUS MATERIALS; DATE PALM FIBERS; BUILDING MATERIAL; WASTE GLASS; PERFORMANCE; DURABILITY; STRENGTH; MICROSTRUCTURE; REDUCTION; MORTAR	In this study, biochar, a carbonaceous solid material produced from three different waste sources (poultry litter, rice husk and pulp and paper mill sludge) was utilized to replace cement content up to 1% of total volume and the effect of individual biochar mixed with cement on the mechanical properties of concrete was investigated through different characterization techniques. A total of 168 sam…	[Akhtar, Ali; Sarmah, Ajit K.] Univ Auckland, Fac Engn, Dept Civil & Environm Engn, Private Bag 92019, Auckland 1142, New Zealand	University of Auckland	Sarmah, AK (corresponding author), Univ Auckland, Fac Engn, Dept Civil & Environm Engn, Private Bag 92019, Auckland 1142, New Zealand.	a.sarmah@auckland.ac.nz	Sarmah, Ajit K/E-7773-2010; Akhtar, Ali/IYJ-6226-2023	Sarmah, Ajit/0000-0003-0664-2605	University of Auckland	University of Auckland	The doctoral scholarship awarded to the first author by The University of Auckland is gratefully acknowledged and the authors wish to thank Stuart Morrow, the mass spectrometry centre, Auckland Science Analytical Services, The University of Auckland, New Zealand, for assistance in ICP-MS analysis. Authors also would like to thank Dr. Lukas Van Zwieten, Department of Primary industries for providi…		43	122	127	20	126	ELSEVIER	AMSTERDAM	RADARWEG 29, 1043 NX AMSTERDAM, NETHERLANDS	0048-9697	1879-1026		SCI TOTAL ENVIRON	Sci. Total Environ.	MAR	2018	616
J	Olszewski, MW; Eisenman, SW				Olszewski, Michael W.; Eisenman, Sasha W.			Influence of biochar amendment on herb growth in a green roof substrate	HORTICULTURE ENVIRONMENT AND BIOTECHNOLOGY			English	Article						basil; heat-expanded clay; peppermint; roof garden	OCIMUM-BASILICUM L.; DIFFERENT FEEDSTOCKS; SOILLESS SUBSTRATE; CROP PRODUCTIVITY; QUALITY; DEPTH; SOILS; ESTABLISHMENT; DROUGHT; MEDIA	The objectives of this research were: 1) to assess the effect of biochar incorporation on the growth of basil (Ocimum basilicum 'Genovese Compact, Improved') and peppermint (Mentha x piperita) and, 2) to determine the physical characteristic differences in heat-expanded clay (HEC) substrate following incorporations of biochar at 5%, 10%, or 15% (by volume). A commercially-available green roof sub…	[Olszewski, Michael W.; Eisenman, Sasha W.] Temple Univ, Dept Landscape Architecture & Hort, 580 Meetinghouse Rd, Ambler, PA 19002 USA	Pennsylvania Commonwealth System of Higher Education (PCSHE); Temple University	Olszewski, MW (corresponding author), Temple Univ, Dept Landscape Architecture & Hort, 580 Meetinghouse Rd, Ambler, PA 19002 USA.	olszewsk@temple.edu			Herb Society of America; United States Environmental Protection Agency STAR [R835557]; EPA [673461, R835557] Funding Source: Federal RePORTER	Herb Society of America; United States Environmental Protection Agency STAR(United States Environmental Protection Agency); EPA(United States Environmental Protection Agency)	This work was supported by a grant from the Herb Society of America and United States Environmental Protection Agency STAR Grant number: R835557.		42	8	8	3	77	KOREAN SOC HORTICULTURAL SCIENCE	JEOLLABUK-DO	C/O NATL INST HORTICULTURAL & HERBAL SCIENCE, 100, NONGSAENGMYEONG-RO, ISEO-MYEON, WANJU-GUN, JEOLLABUK-DO, 565-852, SOUTH KOREA	2211-3452	2211-3460		HORTIC ENVIRON BIOTE	Hortic. Environ. Biotechnol.	AUG	2017	58	4
C	Abbas, S; Sikora, KS		Kang, T; Lee, Y		Abbas, Sandra; Sikora, Karol S.			The Effect of Biochar on Properties of Sulphate Resisting Concrete	PROCEEDINGS OF 2021 4TH INTERNATIONAL CONFERENCE ON CIVIL ENGINEERING AND ARCHITECTURE	Lecture Notes in Civil Engineering		English	Proceedings Paper	4th International Conference on Civil Engineering and Architecture (ICCEA)	JUL 10-12, 2021	ELECTR NETWORK			Biochar in concrete; Supplementary cementitious materials; Concrete rheology; Concrete compressive strength	MECHANICAL-PROPERTIES; WORKABILITY; STRENGTH; BEHAVIOR	Concrete is globally the most used material and the cement industry has contributed to 8% of global emissions. To address climatic targets, supplementary cementitious materials (SCM) from waste products have been presented as a partial cement replacement. By doing so, a double benefit is presented, there is a reduction of waste stored and dumped on landfills and the reduction of the amount of cem…	[Abbas, Sandra; Sikora, Karol S.] Univ Wollongong Dubai, Dubai, U Arab Emirates	University of Wollongong	Sikora, KS (corresponding author), Univ Wollongong Dubai, Dubai, U Arab Emirates.	KarolSikora@uowdubai.ac.ae		Sikora, Karol/0000-0003-4063-3411					36	0	0	1	6	SPRINGER-VERLAG SINGAPORE PTE LTD	SINGAPORE	152 BEACH ROAD, #21-01/04 GATEWAY EAST, SINGAPORE, 189721, SINGAPORE	2366-2557	2366-2565	978-981-16-6932-3; 978-981-16-6931-6	LECT NOTES CIVIL ENG			2022	201
J	Williams, RE; Edwards, DR				Williams, R. E.; Edwards, D. R.			EFFECTS OF BIOCHAR TREATMENT OF MUNICIPAL BIOSOLIDS AND HORSE MANURE ON QUALITY OF RUNOFF FROM FESCUE PLOTS	TRANSACTIONS OF THE ASABE			English	Article						Biochar; Biosolids; Manure; Nutrients; Runoff	ESCHERICHIA-COLI; WATER-QUALITY; PYROLYSIS TEMPERATURE; PHOSPHORUS RUNOFF; SOIL; NUTRIENT; SLUDGE; TRANSPORT; BIOAVAILABILITY; PRODUCTIVITY	Land-applied horse manure and municipal biosolids can increase nutrient and bacteria concentrations in runoff. Biochar has been demonstrated to have beneficial impacts on nutrient retention and runoff quality when used to treat other land-applied organic soil amendments (e.g., poultry manure). The objective of this study was to evaluate the effects of biochar addition to horse manure and municipa…	[Williams, R. E.; Edwards, D. R.] Univ Kentucky, Dept Biosyst & Agr Engn, Lexington, KY USA	University of Kentucky	Edwards, DR (corresponding author), Univ Kentucky, 128 CE Barnhart Bldg, Lexington, KY 40546 USA.	dwayne.edwards@uky.edu		Edwards, Dwayne/0009-0002-9352-6070	USDA National Institute of Food and Agriculture (NIFA) Hatch Multistate Project [1006093]; NIFA [812472, 1006093] Funding Source: Federal RePORTER	USDA National Institute of Food and Agriculture (NIFA) Hatch Multistate Project; NIFA(United States Department of Agriculture (USDA)National Institute of Food and Agriculture)	This is Publication No. 16-05-045 of the Kentucky Agricultural Experiment Station and is published with the approval of the Director. This work is supported by the USDA National Institute of Food and Agriculture (NIFA) Hatch Multistate Project under Grant No. 1006093.		65	3	3	1	36	AMER SOC AGRICULTURAL & BIOLOGICAL ENGINEERS	ST JOSEPH	2950 NILES RD, ST JOSEPH, MI 49085-9659 USA	2151-0032	2151-0040		T ASABE	Trans. ASABE		2017	60	2
J	Wang, L; Chen, L; Tsang, DCW; Kua, HW; Yang, J; Ok, YS; Ding, SM; Hou, DY; Poon, CS				Wang, Lei; Chen, Liang; Tsang, Daniel C. W.; Kua, Ham Wei; Yang, Jian; Ok, Yong Sik; Ding, Shiming; Hou, Deyi; Poon, Chi Sun			The roles of biochar as green admixture for sediment-based construction products	CEMENT & CONCRETE COMPOSITES			English	Article						Microstructure analysis; Eco-friendly construction materials; Engineered biochar; Waste vaorization/recycling; Green/sustainable remediation; Stabilization/solidification	ARSENIC-CONTAINING SOIL; CONTAMINATED SEDIMENT; DREDGED SEDIMENT; FLY-ASH; CEMENT; WASTE; STABILIZATION/SOLIDIFICATION; REMEDIATION; SLUDGE; CARBON	Routine navigational dredging generates huge quantities of marine sediment, posing significant environmental and economic burden. This research intended to explore the efficacy of wood waste biochar as a green admixture and assess the influence of different physico-chemical properties of dredged sediments on the mechanical performance of cement-based sediment products. X-ray diffraction and poros…	[Wang, Lei; Chen, Liang; Tsang, Daniel C. W.; Poon, Chi Sun] Hong Kong Polytech Univ, Dept Civil & Environm Engn, Hung Hom, Kowloon, Hong Kong, Peoples R China; [Kua, Ham Wei] Natl Univ Singapore, Sch Design & Environm, Dept Bldg, 4 Architectural Dr, Singapore S117566, Singapore; [Yang, Jian] Shanghai Jiao Tong Univ, Sch Naval Architecture Ocean & Civil Engn, State Key Lab Ocean Engn, Shanghai, P…	Hong Kong Polytechnic University; National University of Singapore; Shanghai Jiao Tong University; Korea University; Korea University; Chinese Academy of Sciences; Nanjing Institute of Geography & Limnology, CAS; Tsinghua University	Tsang, DCW; Poon, CS (corresponding author), Hong Kong Polytech Univ, Dept Civil & Environm Engn, Hung Hom, Kowloon, Hong Kong, Peoples R China.	dan.tsang@polyu.edu.hk; chi-sun.poon@polyu.edu.hk	Kua, Harn Wei/AAD-2084-2021; Tsang, Dan/E-5442-2012; Poon, Chi Sun/H-4152-2015; Ok, Yong Sik/R-6739-2016; Chen, Liang/AAU-4046-2021; WANG, Lei/C-8138-2018	Tsang, Dan/0000-0002-6850-733X; Ok, Yong Sik/0000-0003-3401-0912; Chen, Liang/0000-0003-3161-1923; WANG, Lei/0000-0002-0336-7241; Poon, Chi Sun/0000-0003-4912-3936; Yang, Jian/0000-0002-3390-5127	Hong Kong Research Grants Council [E-PolyU503/17, PolyU 15223517]; RISUD Collaborative Research Program [4-ZZCN]; PolyU Project of Strategic Importance [1-ZE12]	Hong Kong Research Grants Council(Hong Kong Research Grants Council); RISUD Collaborative Research Program; PolyU Project of Strategic Importance	The authors appreciate the financial support from the Hong Kong Research Grants Council (E-PolyU503/17 and PolyU 15223517), RISUD Collaborative Research Program (4-ZZCN), and PolyU Project of Strategic Importance (1-ZE12) for this study.		48	111	113	13	98	ELSEVIER SCI LTD	OXFORD	THE BOULEVARD, LANGFORD LANE, KIDLINGTON, OXFORD OX5 1GB, OXON, ENGLAND	0958-9465	1873-393X		CEMENT CONCRETE COMP	Cem. Concr. Compos.	NOV	2019	104
J	Suarez-Riera, D; Lavagna, L; Bartoli, M; Giorcelli, M; Pavese, M; Tagliaferro, A				Suarez-Riera, Daniel; Lavagna, Luca; Bartoli, Mattia; Giorcelli, Mauro; Pavese, Matteo; Tagliaferro, Alberto			The influence of biochar shape on cement-based materials	MAGAZINE OF CONCRETE RESEARCH			English	Article						biochar; cement-based composites; mechanical properties; recycling	WASTE; COMPOSITES; GRAPHENE	Biochar-containing cement composites have attracted increasing interest in recent years due to the possibility of reducing the environmental impact linked to cement. They can also improve the mechanical properties and the electrical conductivity of cement-based materials. One parameter that can affect the mechanical performance of biochar-containing cement composites is the morphology of the bioc…	[Suarez-Riera, Daniel] Politecn Torino, Dept Struct Geotech & Bldg Engn, Turin, Italy; [Lavagna, Luca; Giorcelli, Mauro; Pavese, Matteo; Tagliaferro, Alberto] Politecn Torino, Dept Appl Sci & Technol, Turin, Italy; [Lavagna, Luca; Bartoli, Mattia; Pavese, Matteo; Tagliaferro, Alberto] Consorzio Interuniv Nazl Sci & Tecnol Mat INSTM, Florence, Italy; [Bartoli, Mattia] Italian Inst Technol, Ctr Sus…	Polytechnic University of Turin; Polytechnic University of Turin; Istituto Italiano di Tecnologia - IIT	Lavagna, L (corresponding author), Politecn Torino, Dept Appl Sci & Technol, Turin, Italy.;Lavagna, L (corresponding author), Consorzio Interuniv Nazl Sci & Tecnol Mat INSTM, Florence, Italy.	luca.lavagna@polito.it	Lavagna, Luca/Y-6996-2019; Bartoli, Mattia/ABG-5626-2021; Giorcelli, Mauro/I-6256-2015	Lavagna, Luca/0000-0003-3678-1366; Bartoli, Mattia/0000-0002-4678-0212; Giorcelli, Mauro/0000-0002-9620-2357					28	0	0	15	21	ICE PUBLISHING	WESTMINISTER	INST CIVIL ENGINEERS, 1 GREAT GEORGE ST, WESTMINISTER SW 1P 3AA, ENGLAND	0024-9831	1751-763X		MAG CONCRETE RES	Mag. Concr. Res.	NOV	2022	74	21
J	Portmann, AC; LeFevre, GH; Hankawa, R; Werner, D; Higgins, CP				Portmann, Andrea C.; LeFevre, Gregory H.; Hankawa, Rennosuke; Werner, David; Higgins, Christopher P.			The regenerative role of biofilm in the removal of pesticides from stormwater in biochar-amended biofilters	ENVIRONMENTAL SCIENCE-WATER RESEARCH & TECHNOLOGY			English	Article							NATURAL ORGANIC-SUBSTANCES; BLACK CARBON CHAR; ACTIVATED CARBON; POLYFLUOROALKYL SUBSTANCES; 6-CHLORONICOTINIC ACID; ADSORPTIVE PROPERTIES; ENVIRONMENTAL FATE; DRINKING-WATER; SORPTION; SOIL	Low-impact, green infrastructure systems such as biofilters, particularly when amended with biochar, can help address chemical pollution conveyed via stormwater that is increasingly posing a threat to aquatic ecosystems and groundwater quality. Although removal of organic contaminants including pesticides by biochar-amended systems has been studied, the role of a biofouling layer on contaminant r…	[Portmann, Andrea C.; Hankawa, Rennosuke; Higgins, Christopher P.] Colorado Sch Mines, Dept Civil & Environm Engn, Golden, CO 80401 USA; [LeFevre, Gregory H.] Univ Iowa, Dept Civil & Environm Engn, IIHR Hydrosci & Engn, Iowa City, IA 52242 USA; [Werner, David] Newcastle Univ, Sch Engn, Newcastle Upon Tyne NE1 7RU, Tyne & Wear, England	Colorado School of Mines; University of Iowa; N8 Research Partnership; Newcastle University - UK	Higgins, CP (corresponding author), Colorado Sch Mines, Dept Civil & Environm Engn, Golden, CO 80401 USA.	chiggins@mines.edu	Higgins, Christopher P/B-1836-2010	Higgins, Christopher P/0000-0001-6220-8673; LeFevre, Gregory/0000-0002-7746-0297; Portmann, Andrea/0000-0002-4524-6034; Hankawa, Rennosuke/0000-0001-5008-7456	U.S. National Science Foundation Engineering Research Center for Reinventing the Nation's Urban Water Infrastructure (ReNUWIt) [EEC1028968]; NSF [1844720]; Directorate For Engineering; Div Of Chem, Bioeng, Env, & Transp Sys [1844720] Funding Source: National Science Foundation	U.S. National Science Foundation Engineering Research Center for Reinventing the Nation's Urban Water Infrastructure (ReNUWIt); NSF(National Science Foundation (NSF)); Directorate For Engineering; Div Of Chem, Bioeng, Env, & Transp Sys(National Science Foundation (NSF)NSF - Directorate for Engineering (ENG))	Support for this work was provided in part by the U.S. National Science Foundation Engineering Research Center for Reinventing the Nation's Urban Water Infrastructure (ReNUWIt) (Award No. EEC1028968). GHL was supported by NSF Grant No. 1844720.		103	3	3	3	22	ROYAL SOC CHEMISTRY	CAMBRIDGE	THOMAS GRAHAM HOUSE, SCIENCE PARK, MILTON RD, CAMBRIDGE CB4 0WF, CAMBS, ENGLAND	2053-1400	2053-1419		ENVIRON SCI-WAT RES	Environ. Sci.-Wat. Res. Technol.	MAY 5	2022	8	5
J	Falliano, D; De Domenico, D; Sciarrone, A; Ricciardi, G; Restuccia, L; Ferro, G; Tulliani, JM; Gugliandolo, E				Falliano, Devid; De Domenico, Dario; Sciarrone, Antonino; Ricciardi, Giuseppe; Restuccia, Luciana; Ferro, Giuseppe; Tulliani, Jean-Marc; Gugliandolo, Ernesto			Influence of biochar additions on the fracture behavior of foamed concrete	FRATTURA ED INTEGRITA STRUTTURALE			English	Article						Foamed concrete; Fracture Energy; Biochar; CMOD; Curing conditions; Lightweight concretes	CURING CONDITIONS; EAF SLAG; STRENGTH	The present study concerns the experimental investigation of foamed concretes with 1600 kg/m(3) density that incorporate biochar additions in the mix. A series of small notched beams are prepared to determine the fracture energy in CMOD (crack mouth opening displacement) mode and the mechanical properties in terms of flexural and compressive strength. Besides the evaluation of such properties for…	[Falliano, Devid; De Domenico, Dario; Sciarrone, Antonino; Ricciardi, Giuseppe] Univ Messina, Messina, Italy; [Restuccia, Luciana; Ferro, Giuseppe; Tulliani, Jean-Marc] Politecn Torino, Turin, Italy; [Gugliandolo, Ernesto] G Gugliandolo Srl, Messina, Italy	University of Messina; Polytechnic University of Turin	Falliano, D (corresponding author), Univ Messina, Messina, Italy.	dfalliano@unime.it; dario.dedomenico@unime.it; luciana.restuccia@polito.it; ferro@polito.it; ernestoguliandolo@hotmail.com	RESTUCCIA, LUCIANA/AAG-6761-2019; Falliano, Devid/AAS-7622-2021; De Domenico, Dario/O-9028-2019; FERRO, GIUSEPPE ANDREA/F-8300-2018	RESTUCCIA, LUCIANA/0000-0002-6999-0466; Falliano, Devid/0000-0001-6676-9187; De Domenico, Dario/0000-0003-1279-9529; Ricciardi, Giuseppe/0000-0001-9765-9247; FERRO, GIUSEPPE ANDREA/0000-0002-0622-4203					31	13	13	2	10	GRUPPO ITALIANO FRATTURA	CASSINO	VIA G DI BIASIO, CASSINO, 03043, ITALY	1971-8993			FRAT INTEGRITA STRUT	Frat. Integrita Strut.	JAN	2020		51
J	Zhang, Y; He, Y; Sakowski, EG; Preheim, SP				Zhang, Yue; He, Yan; Sakowski, Eric G.; Preheim, Sarah P.			Influence of Simplified Microbial Community Biofilms on Bacterial Retention in Porous Media under Conditions of Stormwater Biofiltration	MICROBIOLOGY SPECTRUM			English	Article						E. coli; porous media; stormwater biofilters; biofilm; microbial community; microbial interaction; community structure	ESCHERICHIA-COLI REMOVAL; FECAL INDICATOR BACTERIA; PSEUDOMONAS-AERUGINOSA; SOLUTION CHEMISTRY; WATER; TRANSPORT; BIOCHAR; BIORETENTION; ADHESION; GROWTH	Porous media filters are used widely to remove bacteria from contaminated water, such as stormwater runoff. Biofilms that colonize filter media during normal function can significantly alter performance, but it is not clear how characteristics of individual populations colonizing porous media combine to affect bacterial retention. We assess how four bacterial strains isolated from stormwater and …	[Zhang, Yue; He, Yan; Sakowski, Eric G.; Preheim, Sarah P.] Johns Hopkins Univ, Dept Environm Hlth & Engn, Baltimore, MD 21218 USA; [He, Yan] Washington Univ, Dept Energy Environm & Chem Engn, St Louis, MO 63110 USA; [Sakowski, Eric G.] Mt St Marys Univ, Dept Sci, Emmitsburg, MD USA	Johns Hopkins University; Washington University (WUSTL)	Preheim, SP (corresponding author), Johns Hopkins Univ, Dept Environm Hlth & Engn, Baltimore, MD 21218 USA.	spreheim@jhu.edu	Preheim, Sarah/B-3432-2010	Preheim, Sarah/0000-0001-7365-2382; Zhang, Yue/0000-0002-3313-6030; Sakowski, Eric/0000-0001-5612-5329	National Science Foundation [1511915]; Johns Hopkins University; Div Of Chem, Bioeng, Env, & Transp Sys; Directorate For Engineering [1511915] Funding Source: National Science Foundation	National Science Foundation(National Science Foundation (NSF)); Johns Hopkins University(Johns Hopkins University); Div Of Chem, Bioeng, Env, & Transp Sys; Directorate For Engineering(National Science Foundation (NSF)NSF - Directorate for Engineering (ENG))	This research was supported by the National Science Foundation (award 1511915). We thank Kai Loon Chen (former PI) for his contributions to acquiring funding and Hanhvy Bui from Johns Hopkins University (JHU) Homewood Flow Cytometry Resource for her support on flow cytometer measurements.		73	0	0	3	21	AMER SOC MICROBIOLOGY	WASHINGTON	1752 N ST NW, WASHINGTON, DC 20036-2904 USA	2165-0497			MICROBIOL SPECTR	Microbiol. Spectr.	OCT	2021	9	2
J	Piscitelli, L; Rivier, PA; Mondelli, D; Miano, T; Joner, EJ				Piscitelli, Lea; Rivier, Pierre-Adrien; Mondelli, Donato; Miano, Teodoro; Joner, Erik J.			Assessment of addition of biochar to filtering mixtures for potential water pollutant removal	ENVIRONMENTAL SCIENCE AND POLLUTION RESEARCH			English	Article						Green roof substrates; Filtering mixtures; Biochar; Heavy metals; Phenanthrene; Column experiment	HEAVY-METALS; AQUEOUS-SOLUTIONS; ADSORPTION; SORPTION; CARBON; SOIL; BIOAVAILABILITY; REMEDIATION; STORMWATER; MECHANISMS	Green roofs are used increasingly to alleviate peaks of water discharge into the sewage systems in urban areas. Surface runoff from roofs contain pollutants from dry and wet deposition, and green roofs offer a possibility to reduce the amounts of pollutants in the water discharged from roofs by degradation and filtering. These pollutants would otherwise enter wastewater treatments plants and ulti…	[Piscitelli, Lea] Mediterranean Agron Inst Bari CIHEAM, Via Ceglie 9, I-70010 Bari, Italy; [Piscitelli, Lea; Rivier, Pierre-Adrien; Joner, Erik J.] Norwegian Inst Bioecon Res, Div Environm & Nat Resources, Hoyskoleveien 7, N-1431 As, Norway; [Mondelli, Donato; Miano, Teodoro] Univ Bari Aldo Moro, Dept Food Plants & Soil Sci, Via G Amendola 165-A, I-70126 Bari, Italy	CIHEAM; CIHEAM BARI; Norwegian Institute of Bioeconomy Research; Universita degli Studi di Bari Aldo Moro	Joner, EJ (corresponding author), Norwegian Inst Bioecon Res, Div Environm & Nat Resources, Hoyskoleveien 7, N-1431 As, Norway.	erik.joner@nibio.no	Miano, Teodoro/C-4578-2008; Piscitelli, Lea/AAF-9480-2021; Joner, Erik Jautris/AAQ-2736-2020	MONDELLI, Donato/0000-0001-8970-2436; Rivier, Pierre-Adrien/0000-0003-4679-2018	International Humic Substances Society (IHSS)	International Humic Substances Society (IHSS)	The authors thank the International Humic Substances Society (IHSS) for providing financial support to young scientist through IHSS-Training Awards, which allowed them to pursue this research work. Moreover, they thank Hans Ragnar Norli (NIBIO) for the help with extractions and performing GC-MS analyses, and Jan-Erik Jacobsen (NIBIO) for ICP analyses.		40	16	18	6	64	SPRINGER HEIDELBERG	HEIDELBERG	TIERGARTENSTRASSE 17, D-69121 HEIDELBERG, GERMANY	0944-1344	1614-7499		ENVIRON SCI POLLUT R	Environ. Sci. Pollut. Res.	JAN	2018	25	3
J	Gupta, S; Kua, HW; Low, CY				Gupta, Souradeep; Kua, Ham Wei; Low, Chin Yang			Use of biochar as carbon sequestering additive in cement mortar	CEMENT & CONCRETE COMPOSITES			English	Article						Biochar; Adsorption; Permeability; Carbon sequestration; Sustainability; Waste management	LIFE-CYCLE ASSESSMENT; CO2 SEQUESTRATION; BLACK CARBON; CONCRETE; PYROLYSIS; CHARCOAL; WATER; TEMPERATURE; IMPROVEMENT; EMISSIONS	Biochar is widely considered as effective way of sequestering carbon dioxide. The possibility of using it to enhance the mechanical strength and reduce permeability of cement mortar is explored in this study. The effect of fresh biochar and biochar saturated with carbon dioxide a priori on the setting time, mechanical strength and permeability of cement mortar was evaluated. The biochar was prepa…	[Gupta, Souradeep; Kua, Ham Wei; Low, Chin Yang] Natl Univ Singapore, Sch Design & Environm, Dept Bldg, 4 Architectural Dr, Singapore 117566, Singapore	National University of Singapore	Gupta, S (corresponding author), Natl Univ Singapore, Sch Design & Environm, Dept Bldg, 4 Architectural Dr, Singapore 117566, Singapore.	gupta.souradeep@u.nus.edu	Kua, Harn Wei/AAD-2084-2021	Gupta, Souradeep/0000-0003-1130-5400	Ministry of Education, Singapore [R-296-000-163-112]	Ministry of Education, Singapore(Ministry of Education, Singapore)	The authors would like to thank the Ministry of Education, Singapore, for providing the Academic Research Fund (tier-1) (R-296-000-163-112) to support this work.		86	168	170	16	122	ELSEVIER SCI LTD	OXFORD	THE BOULEVARD, LANGFORD LANE, KIDLINGTON, OXFORD OX5 1GB, OXON, ENGLAND	0958-9465	1873-393X		CEMENT CONCRETE COMP	Cem. Concr. Compos.	MAR	2018	87
J	Chen, X; Matar, MG; Beatty, DN; Srubar, WV				Chen, Xu; Matar, Mohammad G.; Beatty, Danielle N.; Srubar, Wil V., III			Retardation of Portland Cement Hydration with Photosynthetic Algal Biomass	ACS SUSTAINABLE CHEMISTRY & ENGINEERING			English	Article						algae; Chlorella; cement; admixture; retardation	HEAVY-METALS; CHLORELLA-VULGARIS; CO2 SEQUESTRATION; PYROLYSIS; BIOCHAR; INHIBITION; ABSORPTION; ADMIXTURES; SUCROSE; BATCH	In this work, the effects of raw algal biomass on the hydration kinetics of portland cement are reported. Specifically, direct addition of 0.3%, 0.5%, 1.0%, and 3.0% photosynthetic Chlorella algal biomass to cement paste substantially delayed cement hydration, as indicated by 16.5%, 29.4%, 82.4%, and 812% delays in the main peak of heat evolution measured by isothermal calorimetry. Retardation wa…	[Chen, Xu; Matar, Mohammad G.; Srubar, Wil V., III] Univ Colorado, Dept Civil Environm & Architectural Engn, Boulder, CO 80309 USA; [Chen, Xu] Huazhong Univ Sci & Technol, Sch Civil & Hydraul Engn, Wuhan 430074, Hubei, Peoples R China; [Beatty, Danielle N.; Srubar, Wil V., III] Univ Colorado, Mat Sci & Engn Program, Boulder, CO 80303 USA	University of Colorado System; University of Colorado Boulder; Huazhong University of Science & Technology; University of Colorado System; University of Colorado Boulder	Srubar, WV (corresponding author), Univ Colorado, Dept Civil Environm & Architectural Engn, Boulder, CO 80309 USA.;Srubar, WV (corresponding author), Univ Colorado, Mat Sci & Engn Program, Boulder, CO 80303 USA.	wsrubar@colorado.edu		Srubar III, Wil/0000-0001-8226-2458; Chen, Xu/0000-0002-6813-2849	National Science Foundation [CMMI-1943554]; Advanced Research Projects Agency-Energy [DE-AR0001145]	National Science Foundation(National Science Foundation (NSF)); Advanced Research Projects Agency-Energy	The work depicted was sponsored by the National Science Foundation (award number: CMMI-1943554) and the Advanced Research Projects Agency-Energy (Award Number: DE-AR0001145). Discussion on H2O2 treatment of algae and biopolymers with Dr. Kyle Foster at University of Colorado (CU) is greatly appreciated. The SEM tests were conducted at the COSINC-Characterization Facility, and the XRD tests were c…		61	4	4	8	67	AMER CHEMICAL SOC	WASHINGTON	1155 16TH ST, NW, WASHINGTON, DC 20036 USA	2168-0485			ACS SUSTAIN CHEM ENG	ACS Sustain. Chem. Eng.	OCT 18	2021	9	41
J	Zhang, Y; Xu, HC; Fang, SW; Li, DP; Xue, WZ; Chen, B; Zhao, L				Zhang, Ying; Xu, Huacheng; Fang, Shuwei; Li, Deping; Xue, Weizhen; Chen, Bing; Zhao, Ling			Biochar as additive for improved building performances and heavy metals solidification of sediment-based lightweight concrete	ENVIRONMENTAL SCIENCE AND POLLUTION RESEARCH			English	Article						Dredged river sediment; Lightweight concrete; Biochar; Mechanical properties; Heavy metal leaching; Economic analysis	RAW-MATERIAL; WASTE; BLOCKS; MORTAR; CR(VI); STRAW; WATER; RIVER; BRICK; RISK	The sustainable disposal of large volumes of contaminated dredged river sediment has become a challenge for municipal management. In this study, a cutting-edge biochar application method was innovated, which converted the polluted dredged sediment into a low-carbon and environmentally friendly building material through an autoclave-free method. As the amount of biochar addition increased from 0 t…	[Zhang, Ying; Fang, Shuwei; Zhao, Ling] Shanghai Jiao Tong Univ, China UK Low Carbon Coll, Shanghai 201306, Peoples R China; [Xu, Huacheng] Chinese Acad Sci, Nanjing Inst Geog & Limnol, State Key Lab Lake Sci & Environm, Nanjing 210008, Peoples R China; [Li, Deping; Xue, Weizhen; Zhao, Ling] Shanghai Jiao Tong Univ, Sch Environm Sci & Engn, Shanghai 200240, Peoples R China; [Chen, Bing] Shanghai …	Shanghai Jiao Tong University; Chinese Academy of Sciences; Nanjing Institute of Geography & Limnology, CAS; Shanghai Jiao Tong University; Shanghai Jiao Tong University	Zhao, L (corresponding author), Shanghai Jiao Tong Univ, China UK Low Carbon Coll, Shanghai 201306, Peoples R China.;Zhao, L (corresponding author), Shanghai Jiao Tong Univ, Sch Environm Sci & Engn, Shanghai 200240, Peoples R China.	wszhaoling@sjtu.edu.cn			National Natural Science Foundation of China [41877110]; National Observation and Research Station of Erhai Lake Ecosystem in Yunnan	National Natural Science Foundation of China(National Natural Science Foundation of China (NSFC)); National Observation and Research Station of Erhai Lake Ecosystem in Yunnan	This work is supported by National Natural Science Foundation of China (No. 41877110) and National Observation and Research Station of Erhai Lake Ecosystem in Yunnan.		59	1	1	5	20	SPRINGER HEIDELBERG	HEIDELBERG	TIERGARTENSTRASSE 17, D-69121 HEIDELBERG, GERMANY	0944-1344	1614-7499		ENVIRON SCI POLLUT R	Environ. Sci. Pollut. Res.	JAN	2023	30	2
C	Suarez-Riera, D; Restuccia, L; Ferro, GA		Kourkoulis, S; Iacoviello, F; Triantis, D; Berto, F; Karelakas, D; Ferro, G		Suarez-Riera, D.; Restuccia, L.; Ferro, G. A.			The use of Biochar to reduce the carbon footprint of cement-based materials	1ST MEDITERRANEAN CONFERENCE ON FRACTURE AND STRUCTURAL INTEGRITY (MEDFRACT1)	Procedia Structural Integrity		English	Proceedings Paper	1st Mediterranean Conference on Fracture and Structural Integrity (MedFract)	FEB, 2020	ELECTR NETWORK	Greek Soc Expt Mech Mat,Italian Grp Fracture		Biochar; Cement paste; Mortar; Mechanical properties; Carbon footprint	PYROLYSIS TEMPERATURE; SOLID-WASTE; COMPOSITES; CONCRETE; MORTAR; HUSKS	The organic waste management is a most current topic, because its processing and degradation it is responsible for emissions of methane and other greenhouse gases, leading to serious environmental problems. Limited oxygen thermochemical processes, such as pyrolysis or gasification, have demonstrated the energy recovery potential of the treated biomass and its environmental benefits. However, the …	[Suarez-Riera, D.; Restuccia, L.; Ferro, G. A.] Politecn Torino, Dept Struct Geotech & Bldg Engn DISEG, Turin, Italy	Polytechnic University of Turin	Suarez-Riera, D (corresponding author), Politecn Torino, Dept Struct Geotech & Bldg Engn DISEG, Turin, Italy.	daniel.suarez@polito.it	RESTUCCIA, LUCIANA/AAG-6761-2019; FERRO, GIUSEPPE ANDREA/F-8300-2018	RESTUCCIA, LUCIANA/0000-0002-6999-0466; FERRO, GIUSEPPE ANDREA/0000-0002-0622-4203					50	22	22	4	20	ELSEVIER SCIENCE BV	AMSTERDAM	SARA BURGERHARTSTRAAT 25, PO BOX 211, 1000 AE AMSTERDAM, NETHERLANDS	2452-3216			PROCEDIA STRUCT INTE			2020	26
J	Jiang, CB; Li, JK; Hu, YH; Yao, YT; Li, HE				Jiang, Chunbo; Li, Jiake; Hu, Yihong; Yao, Yutong; Li, Huaien			Construction of water-soil-plant system for rainfall vertical connection in the concept of sponge city: A review	JOURNAL OF HYDROLOGY			English	Review						Sponge city; Low impact development; Vertical connection; Long-term operation; Coupled simulation	BIORETENTION AMENDMENT; STORMWATER MANAGEMENT; PERFORMANCE; NUTRIENT; NITROGEN; REMOVAL; BIOCHAR; LITTER; BIOFILTERS; EFFICIENCY	The green infrastructure (GI)/low impact development (LID) facilities aim to control the runoff and its associated pollutants in the context of climate change and accelerated urbanization, so as to make the urban development areas as close as possible to the natural hydrological cycle. Compared with the fragmented facilities construction and research, the large-scale LID planning require deep-goi…	[Jiang, Chunbo; Li, Jiake; Li, Huaien] Xian Univ Technol, State Key Lab Ecohydraul Northwest Arid Reg China, Xian 710048, Peoples R China; [Jiang, Chunbo; Li, Jiake; Yao, Yutong; Li, Huaien] Xian Univ Technol, Dept Municipal & Environm Engn, Xian 710048, Shaanxi, Peoples R China; [Hu, Yihong] Shaanxi Xixian Sponge City Engn & Technol Co Ltd, Xian 712000, Peoples R China	Xi'an University of Technology; Xi'an University of Technology	Li, JK (corresponding author), Xian Univ Technol, State Key Lab Ecohydraul Northwest Arid Reg China, Xian 710048, Peoples R China.	xaut_ljk@163.com			National Natural Science Foundation of China [52000150]	National Natural Science Foundation of China(National Natural Science Foundation of China (NSFC))	This research was financially supported by the National Natural Science Foundation of China (52000150) .		82	13	13	39	139	ELSEVIER	AMSTERDAM	RADARWEG 29, 1043 NX AMSTERDAM, NETHERLANDS	0022-1694	1879-2707		J HYDROL	J. Hydrol.	FEB	2022	605
J	Wang, H; Garg, A; Zhang, XY; Xiao, YY; Mei, GX				Wang, Hao; Garg, Ankit; Zhang, Xiaoyong; Xiao, Yangyang; Mei, Guoxiong			Utilization of coconut shell residual in green roof: hydraulic and thermal properties of expansive soil amended with biochar and fibre including theoretical model	ACTA GEOPHYSICA			English	Article						Biochar; Green roof; Coconut shell; Expansive soil; Fibre; Sponge city	WATER-CONTENT; DRY DENSITY; MANAGEMENT; SUCTION; PERMEABILITY; ACCURACY; CARBON; SENSOR; RATIO	The study intends to explore hydraulic and thermal properties of expansive soils treated with fibre, biochar and biochar-fibre mix. Both fibre and biochar are derived from coconut shell, which is highly common in coastal regions around the world. Besides, benefits, limitations and engineering feasibility of these geomaterials in green roofs are explored. Theoretical framework for thermal-hydrauli…	[Wang, Hao; Garg, Ankit; Zhang, Xiaoyong; Xiao, Yangyang; Mei, Guoxiong] Guangxi Univ, Coll Civil Engn & Architecture, Nanning 530004, Peoples R China; [Wang, Hao; Garg, Ankit; Zhang, Xiaoyong; Xiao, Yangyang; Mei, Guoxiong] Guangxi Univ, Key Lab Disaster Prevent & Struct Safety, Minist Educ, Nanning 530004, Peoples R China; [Wang, Hao; Garg, Ankit; Zhang, Xiaoyong; Xiao, Yangyang; Mei, Guoxiong]…	Guangxi University; Guangxi University	Mei, GX (corresponding author), Guangxi Univ, Coll Civil Engn & Architecture, Nanning 530004, Peoples R China.;Mei, GX (corresponding author), Guangxi Univ, Key Lab Disaster Prevent & Struct Safety, Minist Educ, Nanning 530004, Peoples R China.;Mei, GX (corresponding author), Key Lab Disaster Prevent & Mitigat & Engn Safety, Nanning 530004, Peoples R China.	meiguox@163.com	garg, ankit/AAH-9210-2019; Zhang, Xiaoyong/D-9181-2017	garg, ankit/0000-0001-5377-8519; Zhang, Xiaoyong/0000-0002-0966-4343; Wang, Hao/0000-0003-2130-3994	National Natural Science Foundation of China [51878185]; Changjiang Scholars Program of the Ministry of Education of China [T2014273]; Innovative Research Team Program of Guangxi Natural Science Foundation [2016GXNSFGA380008]	National Natural Science Foundation of China(National Natural Science Foundation of China (NSFC)); Changjiang Scholars Program of the Ministry of Education of China; Innovative Research Team Program of Guangxi Natural Science Foundation	All authors would like to express their gratitude sincerely to the National Natural Science Foundation of China (Grant No. 51878185), the Changjiang Scholars Program of the Ministry of Education of China (Grant No. T2014273) and the Innovative Research Team Program of Guangxi Natural Science Foundation (Grant No. 2016GXNSFGA380008) for financial supports.		53	11	11	8	47	SPRINGER INTERNATIONAL PUBLISHING AG	CHAM	GEWERBESTRASSE 11, CHAM, CH-6330, SWITZERLAND	1895-6572	1895-7455		ACTA GEOPHYS	Acta Geophys.	DEC	2020	68	6
J	Wang, L; Chen, L; Tsang, DCW; Guo, BL; Yang, J; Shen, ZT; Hou, D; Ok, YS; Poon, CS				Wang, Lei; Chen, Liang; Tsang, Daniel C. W.; Guo, Binglin; Yang, Jian; Shen, Zhengtao; Hou, Deyi; Ok, Yong Sik; Poon, Chi Sun			Biochar as green additives in cement-based composites with carbon dioxide curing	JOURNAL OF CLEANER PRODUCTION			English	Article						Wood biochar; Accelerated carbonation; Biomass recycling; Cement and concrete composites; CO2 utilisation; Sustainable waste management	CONCRETE BLOCKS; CO2; WOOD; SEQUESTRATION; SOIL; COMBINATION; MORTARS; FIBERS; SLUDGE; PB	Biochar is a green material obtained from the thermochemical conversion of waste biomass under an oxygen-limited condition. This study demonstrated a novel and sustainable method for incorporating waste wood-derived biochar in cement-based composites with CO2 curing. The X-ray diffraction (XRD) and thermogravimetric analyses (TGA) illustrated that the incorporation of biochar promoted the generat…	[Wang, Lei; Chen, Liang; Tsang, Daniel C. W.; Poon, Chi Sun] Hong Kong Polytech Univ, Dept Civil & Environm Engn, Hung Hom, Kowloon, Hong Kong, Peoples R China; [Wang, Lei] Tech Univ Dresden, Inst Construct Mat, DE-01062 Dresden, Germany; [Guo, Binglin] Kyushu Univ, Dept Earth Resource Engn, Fukuoka 8190395, Japan; [Yang, Jian] Shanghai Jiao Tong Univ, Sch Naval Architecture Ocean & Civil Engn, S…	Hong Kong Polytechnic University; Technische Universitat Dresden; Kyushu University; Shanghai Jiao Tong University; Tsinghua University; University of Alberta; Korea University	Tsang, DCW (corresponding author), Hong Kong Polytech Univ, Dept Civil & Environm Engn, Hung Hom, Kowloon, Hong Kong, Peoples R China.	dan.tsang@polyu.edu.hk	Ok, Yong Sik/R-6739-2016; Guo, Binglin/AAL-2067-2020; WANG, Lei/C-8138-2018; Tsang, Dan/E-5442-2012; Akeed, Mahmoud H./HHN-6379-2022; Chen, Liang/AAU-4046-2021; Poon, Chi Sun/H-4152-2015	Ok, Yong Sik/0000-0003-3401-0912; WANG, Lei/0000-0002-0336-7241; Tsang, Dan/0000-0002-6850-733X; Akeed, Mahmoud H./0000-0002-2760-618X; Chen, Liang/0000-0003-3161-1923; Poon, Chi Sun/0000-0003-4912-3936; Yang, Jian/0000-0002-3390-5127	Hong Kong Research Grants Council [PolyU 15223517]; Alexander von Humboldt Foundation (AvH)	Hong Kong Research Grants Council(Hong Kong Research Grants Council); Alexander von Humboldt Foundation (AvH)(Alexander von Humboldt Foundation)	The authors appreciate the financial support of the Hong Kong Research Grants Council (PolyU 15223517) and the Alexander von Humboldt Foundation (AvH) for this study.		46	131	133	62	238	ELSEVIER SCI LTD	OXFORD	THE BOULEVARD, LANGFORD LANE, KIDLINGTON, OXFORD OX5 1GB, OXON, ENGLAND	0959-6526	1879-1786		J CLEAN PROD	J. Clean Prod.	JUN 10	2020	258
J	Rylko-Polak, I; Komala, W; Bialowiec, A				Rylko-Polak, Iwona; Komala, Wojciech; Bialowiec, Andrzej			The Reuse of Biomass and Industrial Waste in Biocomposite Construction Materials for Decreasing Natural Resource Use and Mitigating the Environmental Impact of the Construction Industry: A Review	MATERIALS			English	Review						mineral waste; bio-based waste; natural fiber; biomass; sulfur waste; copper flotation; fly ash; biochar; sustainable construction	FLY-ASH; LIGNIN; CONCRETE; OXIDATION; CEMENT; SEQUESTRATION; COMPOSITES; ADSORPTION; STRENGTH; BIOCHAR	The construction industry is the world's largest emitter of greenhouse gases. The CO2 emission levels in the atmosphere are already reaching a tipping point and could cause severe climate change. An important element is the introduction of a technology that allows for the capture and sequencing of carbon dioxide levels, reducing both emissions and the carbon footprint from the production of Portl…	[Rylko-Polak, Iwona; Bialowiec, Andrzej] Wroclaw Univ Environm & Life Sci, Dept Appl Bioecon, 37a Chelmonskiego Str, PL-51630 Wroclaw, Poland; [Rylko-Polak, Iwona; Komala, Wojciech] Selena Labs Sp Zoo, Pieszycka 1, PL-58200 Dzierzoniow, Poland	Wroclaw University of Environmental & Life Sciences	Bialowiec, A (corresponding author), Wroclaw Univ Environm & Life Sci, Dept Appl Bioecon, 37a Chelmonskiego Str, PL-51630 Wroclaw, Poland.	iwona.rylko-polak@upwr.edu.pl; wojciech.komala@selena.com; andrzej.bialowiec@upwr.edu.pl	郭, 青霞/GZH-2618-2022; Bialowiec, Andrzej/O-4646-2014	Bialowiec, Andrzej/0000-0002-5871-2129	Polish Ministry of Education and Science [DWD/5/0042/2021]; Wroclaw University of Environmental and Life Sciences	Polish Ministry of Education and Science(Ministry of Science and Higher Education, Poland); Wroclaw University of Environmental and Life Sciences	This work was supported by the Polish Ministry of Education and Science (grant number DWD/5/0042/2021), grant title The use of waste raw materials of the agri-food and mineral industry for the production of biocomposite prefabricates. The APC is financed by the Wroclaw University of Environmental and Life Sciences.		132	8	8	11	31	MDPI	BASEL	ST ALBAN-ANLAGE 66, CH-4052 BASEL, SWITZERLAND		1996-1944		MATERIALS	Materials	JUN	2022	15	12
J	Wang, YX; Li, XL; Liu, R				Wang, Yixiao; Li, Xiaolin; Liu, Rui			The Capture and Transformation of Carbon Dioxide in Concrete: A Review	SYMMETRY-BASEL			English	Review						carbon capture; carbonation; cement-based materials	CO2 CAPTURE; SURFACE-TREATMENT; SEQUESTRATION; BIOCHAR; ABSORPTION; STRAW; PRECIPITATION; PERMEABILITY; PERFORMANCE; TECHNOLOGY	Concrete is one of the most commonly used engineering materials in the world. Carbonation of cement-based materials balances the CO2 emissions from the cement industry, which means that carbon neutrality in the cement industry can be achieved by the carbon sequestration ability of cement-based materials. Carbon dioxide is a symmetrical molecule and is difficult to separate. This work introduces t…	[Wang, Yixiao; Liu, Rui] Harbin Inst Technol, Minist Educ, Key Lab Struct Dynam Behav & Control, Harbin 150090, Peoples R China; [Wang, Yixiao; Liu, Rui] Harbin Inst Technol, Mitigat Civil Engn Minist Ind & Informat Technol, Key Lab Disaster Smart Prevent, Harbin 150090, Peoples R China; [Wang, Yixiao; Liu, Rui] Harbin Inst Technol, Sch Civil Engn, Harbin 150090, Peoples R China; [Li, Xiaolin] Sh…	Harbin Institute of Technology; Harbin Institute of Technology; Harbin Institute of Technology; ShenZhen Polytechnic	Liu, R (corresponding author), Harbin Inst Technol, Minist Educ, Key Lab Struct Dynam Behav & Control, Harbin 150090, Peoples R China.;Liu, R (corresponding author), Harbin Inst Technol, Mitigat Civil Engn Minist Ind & Informat Technol, Key Lab Disaster Smart Prevent, Harbin 150090, Peoples R China.;Liu, R (corresponding author), Harbin Inst Technol, Sch Civil Engn, Harbin 150090, Peoples R China…	lixiaolin0427@szpt.edu.cn; liuruii@hit.edu.cn			Guangdong Basic and Applied Basic Research Foundation [2021A1515011808]; National Natural Science Foundation of China [52105307]; Shenzhen Science and Technology Program [RCBS20210609104444087]; Research Funding of Post-doctoral Who Came to Shenzhen [4103-6021271018K1]; Scientific Research Start-up Project of Shenzhen Polytechnic [4103-6022312030K]; Ningxia Key Research and Development Plan Forei…	Guangdong Basic and Applied Basic Research Foundation; National Natural Science Foundation of China(National Natural Science Foundation of China (NSFC)); Shenzhen Science and Technology Program; Research Funding of Post-doctoral Who Came to Shenzhen; Scientific Research Start-up Project of Shenzhen Polytechnic; Ningxia Key Research and Development Plan Foreign Science and Technology Cooperation P…	The work is supported by the Guangdong Basic and Applied Basic Research Foundation (2021A1515011808), National Natural Science Foundation of China (52105307), Shenzhen Science and Technology Program (RCBS20210609104444087), Research Funding of Post-doctoral Who Came to Shenzhen (4103-6021271018K1), Scientific Research Start-up Project of Shenzhen Polytechnic (4103-6022312030K), Ningxia Key Resear…		119	0	0	40	50	MDPI	BASEL	ST ALBAN-ANLAGE 66, CH-4052 BASEL, SWITZERLAND		2073-8994		SYMMETRY-BASEL	Symmetry-Basel	DEC	2022	14	12
J	Su, YL; Qian, CX; Rui, YF; Feng, JH				Su, Yilin; Qian, Chunxiang; Rui, Yafeng; Feng, Jianhang			Exploring the coupled mechanism of fibers and bacteria on self-healing concrete from bacterial extracellular polymeric substances (EPS)	CEMENT & CONCRETE COMPOSITES			English	Article						Bacteria; Fiber; EPS; Mechanism; Self-healing; Concrete	CEMENTITIOUS MATERIALS; QUANTIFICATION; PERFORMANCE; BIOCHAR; CRACKS; TEMPERATURE; DURABILITY; CAPABILITY; HYDRATION; MORTAR	With the development of the sustainable cement industry, the self-healing properties of concrete have received widespread attention. In many studies, both microorganisms and fibers play an important role in promoting the self-healing ability of concrete. In particular, some recent studies have tried to load microorganisms with fibers for improving the self-healing ability of concrete; and these s…	[Su, Yilin; Qian, Chunxiang; Rui, Yafeng] Southeast Univ, Sch Mat Sci & Engn, JiulonghuCampus, Nanjing 211189, Peoples R China; [Su, Yilin; Qian, Chunxiang; Rui, Yafeng] Southeast Univ, Jiangsu Key Lab Construct Mat, Nanjing 211189, Peoples R China; [Su, Yilin; Qian, Chunxiang; Rui, Yafeng] Southeast Univ, Res Inst Green Construct Mat, Nanjing 211189, Peoples R China; [Feng, Jianhang] Nanyang Tec…	Southeast University - China; Southeast University - China; Southeast University - China; Nanyang Technological University & National Institute of Education (NIE) Singapore; Nanyang Technological University	Qian, CX (corresponding author), Southeast Univ, Sch Mat Sci & Engn, JiulonghuCampus, Nanjing 211189, Peoples R China.	cxqian@seu.edu.cn	Feng, Jianhang/GYR-0450-2022	Qian, Chunxiang/0000-0002-7547-5890	National Natural Science Foundation of China [51738003]	National Natural Science Foundation of China(National Natural Science Foundation of China (NSFC))	The financial help of the National Natural Science Foundation of China (Grant No. 51738003) is gratefully acknowledged.		43	32	32	8	93	ELSEVIER SCI LTD	OXFORD	THE BOULEVARD, LANGFORD LANE, KIDLINGTON, OXFORD OX5 1GB, OXON, ENGLAND	0958-9465	1873-393X		CEMENT CONCRETE COMP	Cem. Concr. Compos.	FEB	2021	116
J	Tan, KH; Pang, XJ; Qin, YH; Wang, JS				Tan, Kanghao; Pang, Xijun; Qin, Yinghong; Wang, Junsong			Properties of cement mortar containing pulverized biochar pyrolyzed at different temperatures	CONSTRUCTION AND BUILDING MATERIALS			English	Article						Biochar; Pyrolysis temperature; Cement-based materials; Mortar properties	WASTE; CO2; BIOMASS; STORAGE; FILLER; CHARS; WOOD	Cement manufacturing is a significant source of global carbon dioxide emissions, which can be curtailed if a portion of cement is replaced by biochar (BC). Although there are positive outcomes of application in BC-cement composites, the effects of pulverized BC pyrolyzed at different temperatures on the properties of cement mortar is remain unknown. Here we studied the fluidity, setting time, wat…	[Tan, Kanghao; Pang, Xijun; Qin, Yinghong] Guangxi Univ, Coll Civil Engn & Architecture, 100 Univ Rd, Nanning 530004, Guangxi, Peoples R China; [Tan, Kanghao; Pang, Xijun; Qin, Yinghong] Minist Educ, Key Lab Disaster Prevent & Struct Safety, Nanning 530004, Guangxi, Peoples R China; [Tan, Kanghao; Wang, Junsong] South China Univ Technol, Sch Architecture, State Key Lab Subtrop Bldg Sci, Guangzhou…	Guangxi University; South China University of Technology	Wang, JS (corresponding author), South China Univ Technol, Sch Architecture, State Key Lab Subtrop Bldg Sci, Guangzhou 510641, Guangdong, Peoples R China.	arwjs@mail.scut.edu.cn	kanghao, Tan/GNM-9884-2022; Wang, Junsong/GNH-4461-2022	Wang, Junsong/0000-0002-2401-5771	high-level innovation team and outstanding scholar program in Guangxi colleges; National Natural Science Foundation of China [41561015, 51678164, 51878287]; Science Foundation of Guangxi [2018GXNSFAA294070, 2018GXNSFDA138009]	high-level innovation team and outstanding scholar program in Guangxi colleges; National Natural Science Foundation of China(National Natural Science Foundation of China (NSFC)); Science Foundation of Guangxi	This work is jointly supported by the high-level innovation team and outstanding scholar program in Guangxi colleges (granted to Dr. Yinghong Qin), the National Natural Science Foundation of China (Nos. 41561015, 51678164, 51878287), and the Science Foundation of Guangxi (No.2018GXNSFAA294070, 2018GXNSFDA138009).		36	31	32	6	26	ELSEVIER SCI LTD	OXFORD	THE BOULEVARD, LANGFORD LANE, KIDLINGTON, OXFORD OX5 1GB, OXON, ENGLAND	0950-0618	1879-0526		CONSTR BUILD MATER	Constr. Build. Mater.	DEC 10	2020	263
[truncated: 1,725 more rows]
[truncated: 22 more columns]

## Sheet: Year
Publication Years	Record Count	% of 1,897
2007	1	0.053
2009	1	0.053
[truncated: 14 more rows]

## Sheet: Journal name
Publication Titles	Record Count	% of 1,897
[truncated: 533 more rows]

[truncated: 8 more sheets: Document types, Web of Science categories, Affiliations, Country_region, Research areas, Language, SDGs, Authors]
